# Supplementary material
Source: publisher figshare collection journal article supplement (https://karger.figshare.com/articles/dataset/_/16616062)
Supplement: Supplementary file 1 [file 1]

## Top models for PCT\_CHG\_30 predicting DAYS\_DEATH\_90

| Model Variables                                                                      | Predictor        | Hazard Ratio | HR 95% CI<br>Lower Bound | HR 95% CI<br>Upper Bound | p-value | AIC     |
|--------------------------------------------------------------------------------------|------------------|--------------|--------------------------|--------------------------|---------|---------|
| PCT_CHG_30 AGE SOFA PLAT_COUNT<br>SEPSIS INR HAEMOGLOBIN ALBUMIN                     | PCT_CHG_30       | 1.374        | 1.139                    | 1.657                    | 0.0009  | 6583.10 |
|                                                                                      | AGE              | 1.019        | 1.012                    | 1.026                    | <.0001  |         |
|                                                                                      | SOFA             | 1.248        | 1.071                    | 1.454                    | 0.0045  |         |
|                                                                                      | PLAT_COUNT       | 0.998        | 0.997                    | 0.999                    | <.0001  |         |
|                                                                                      | SEPSIS           | 1.251        | 1.038                    | 1.509                    | 0.0188  |         |
|                                                                                      | INR              | 1.097        | 1.018                    | 1.183                    | 0.0155  |         |
|                                                                                      | HAEMOGLOBIN      | 0.993        | 0.987                    | 0.998                    | 0.0045  |         |
|                                                                                      | ALBUMIN          | 0.978        | 0.965                    | 0.991                    | 0.0013  |         |
| PCT_CHG_30 AGE SEX SOFA PLAT_COUNT<br>SEPSIS INR HAEMOGLOBIN ALBUMIN                 | PCT_CHG_30       | 1.378        | 1.142                    | 1.662                    | 0.0008  | 6584.77 |
|                                                                                      | AGE              | 1.019        | 1.012                    | 1.026                    | <.0001  |         |
|                                                                                      | Female vs. Male  | 0.946        | 0.782                    | 1.144                    | 0.5665  |         |
|                                                                                      | SOFA             | 1.248        | 1.071                    | 1.453                    | 0.0045  |         |
|                                                                                      | PLAT_COUNT       | 0.998        | 0.997                    | 0.999                    | <.0001  |         |
|                                                                                      | SEPSIS           | 1.254        | 1.040                    | 1.513                    | 0.0176  |         |
|                                                                                      | INR              | 1.099        | 1.019                    | 1.186                    | 0.0141  |         |
|                                                                                      | HAEMOGLOBIN      | 0.993        | 0.987                    | 0.998                    | 0.0043  |         |
|                                                                                      | ALBUMIN          | 0.978        | 0.965                    | 0.991                    | 0.0012  |         |
| PCT_CHG_30 AGE SOFA PLAT_COUNT<br>SEPSIS INR HAEMOGLOBIN<br>WHITE_CELL_COUNT ALBUMIN | PCT_CHG_30       | 1.369        | 1.135                    | 1.652                    | 0.0011  | 6584.78 |
|                                                                                      | AGE              | 1.019        | 1.012                    | 1.026                    | <.0001  |         |
|                                                                                      | SOFA             | 1.247        | 1.070                    | 1.453                    | 0.0047  |         |
|                                                                                      | PLAT_COUNT       | 0.998        | 0.997                    | 0.999                    | <.0001  |         |
|                                                                                      | SEPSIS           | 1.246        | 1.033                    | 1.503                    | 0.0214  |         |
|                                                                                      | INR              | 1.098        | 1.018                    | 1.184                    | 0.0149  |         |
|                                                                                      | HAEMOGLOBIN      | 0.993        | 0.987                    | 0.998                    | 0.0046  |         |
|                                                                                      | WHITE_CELL_COUNT | 1.001        | 0.998                    | 1.004                    | 0.5319  |         |
|                                                                                      | ALBUMIN          | 0.978        | 0.965                    | 0.991                    | 0.0012  |         |
| PCT_CHG_30 AGE SOFA PLAT_COUNT<br>SEPSIS INR HAEMOGLOBIN ALBUMIN TRT                 | PCT_CHG_30       | 1.376        | 1.141                    | 1.661                    | 0.0008  | 6584.89 |
|                                                                                      | AGE              | 1.019        | 1.012                    | 1.026                    | <.0001  |         |
|                                                                                      | SOFA             | 1.247        | 1.071                    | 1.452                    | 0.0046  |         |
|                                                                                      | PLAT_COUNT       | 0.998        | 0.997                    | 0.999                    | <.0001  |         |
|                                                                                      | SEPSIS           | 1.250        | 1.037                    | 1.508                    | 0.0192  |         |
|                                                                                      | INR              | 1.098        | 1.018                    | 1.183                    | 0.0152  |         |
|                                                                                      | HAEMOGLOBIN      | 0.993        | 0.987                    | 0.998                    | 0.0045  |         |

Top models for PCT\_CHG\_30 predicting DAYS\_DEATH\_90

| Model Variables                                                      | Predictor        | Hazard Ratio | HR 95% CI<br>Lower Bound | HR 95% CI<br>Upper Bound | p-value | AIC     |
|----------------------------------------------------------------------|------------------|--------------|--------------------------|--------------------------|---------|---------|
| PCT_CHG_30 AGE SOFA PLAT_COUNT<br>SEPSIS INR HAEMOGLOBIN ALBUMIN TRT | ALBUMIN          | 0.978        | 0.965                    | 0.991                    | 0.0013  | 6584.89 |
|                                                                      | Trt: High vs. Lo | 1.042        | 0.872                    | 1.246                    | 0.6472  |         |

## Top models for PCT\_CHG\_40 predicting DAYS\_DEATH\_90

| Model Variables                                                                      | Predictor        | Hazard Ratio | HR 95% CI<br>Lower Bound | HR 95% CI<br>Upper Bound | p-value | AIC     |
|--------------------------------------------------------------------------------------|------------------|--------------|--------------------------|--------------------------|---------|---------|
| PCT_CHG_40 AGE SOFA PLAT_COUNT<br>SEPSIS INR HAEMOGLOBIN ALBUMIN                     | PCT_CHG_40       | 1.442        | 1.195                    | 1.739                    | 0.0001  | 6579.82 |
|                                                                                      | AGE              | 1.019        | 1.012                    | 1.025                    | <.0001  |         |
|                                                                                      | SOFA             | 1.236        | 1.061                    | 1.441                    | 0.0067  |         |
|                                                                                      | PLAT_COUNT       | 0.998        | 0.997                    | 0.999                    | <.0001  |         |
|                                                                                      | SEPSIS           | 1.248        | 1.035                    | 1.504                    | 0.0205  |         |
|                                                                                      | INR              | 1.097        | 1.018                    | 1.182                    | 0.0151  |         |
|                                                                                      | HAEMOGLOBIN      | 0.993        | 0.987                    | 0.998                    | 0.0042  |         |
|                                                                                      | ALBUMIN          | 0.980        | 0.967                    | 0.993                    | 0.0025  |         |
| PCT_CHG_40 AGE SEX SOFA PLAT_COUNT<br>SEPSIS INR HAEMOGLOBIN ALBUMIN                 | PCT_CHG_40       | 1.450        | 1.201                    | 1.751                    | 0.0001  | 6581.28 |
|                                                                                      | AGE              | 1.018        | 1.012                    | 1.025                    | <.0001  |         |
|                                                                                      | Female vs. Male  | 0.931        | 0.770                    | 1.126                    | 0.4611  |         |
|                                                                                      | SOFA             | 1.236        | 1.060                    | 1.440                    | 0.0067  |         |
|                                                                                      | PLAT_COUNT       | 0.998        | 0.997                    | 0.999                    | <.0001  |         |
|                                                                                      | SEPSIS           | 1.251        | 1.038                    | 1.509                    | 0.0190  |         |
|                                                                                      | INR              | 1.099        | 1.020                    | 1.185                    | 0.0133  |         |
|                                                                                      | HAEMOGLOBIN      | 0.992        | 0.987                    | 0.998                    | 0.0039  |         |
|                                                                                      | ALBUMIN          | 0.979        | 0.966                    | 0.993                    | 0.0023  |         |
| PCT_CHG_40 AGE SOFA PLAT_COUNT<br>SEPSIS INR HAEMOGLOBIN<br>WHITE_CELL_COUNT ALBUMIN | PCT_CHG_40       | 1.437        | 1.191                    | 1.734                    | 0.0002  | 6581.52 |
|                                                                                      | AGE              | 1.019        | 1.012                    | 1.025                    | <.0001  |         |
|                                                                                      | SOFA             | 1.235        | 1.059                    | 1.439                    | 0.0070  |         |
|                                                                                      | PLAT_COUNT       | 0.998        | 0.997                    | 0.999                    | <.0001  |         |
|                                                                                      | SEPSIS           | 1.243        | 1.030                    | 1.499                    | 0.0230  |         |
|                                                                                      | INR              | 1.098        | 1.019                    | 1.183                    | 0.0146  |         |
|                                                                                      | HAEMOGLOBIN      | 0.993        | 0.987                    | 0.998                    | 0.0043  |         |
|                                                                                      | WHITE_CELL_COUNT | 1.001        | 0.998                    | 1.004                    | 0.5482  |         |
|                                                                                      | ALBUMIN          | 0.979        | 0.966                    | 0.993                    | 0.0024  |         |
| PCT_CHG_40 AGE SOFA PLAT_COUNT<br>SEPSIS INR HAEMOGLOBIN ALBUMIN TRT                 | PCT_CHG_40       | 1.445        | 1.197                    | 1.744                    | 0.0001  | 6581.57 |
|                                                                                      | AGE              | 1.019        | 1.012                    | 1.025                    | <.0001  |         |
|                                                                                      | SOFA             | 1.235        | 1.060                    | 1.439                    | 0.0068  |         |
|                                                                                      | PLAT_COUNT       | 0.998        | 0.997                    | 0.999                    | <.0001  |         |
|                                                                                      | SEPSIS           | 1.247        | 1.034                    | 1.503                    | 0.0208  |         |
|                                                                                      | INR              | 1.097        | 1.018                    | 1.182                    | 0.0148  |         |
|                                                                                      | HAEMOGLOBIN      | 0.993        | 0.987                    | 0.998                    | 0.0042  |         |

Top models for PCT\_CHG\_40 predicting DAYS\_DEATH\_90

| Model Variables                                                      | Predictor        | Hazard Ratio | HR 95% CI<br>Lower Bound | HR 95% CI<br>Upper Bound | p-value | AIC     |
|----------------------------------------------------------------------|------------------|--------------|--------------------------|--------------------------|---------|---------|
| PCT_CHG_40 AGE SOFA PLAT_COUNT<br>SEPSIS INR HAEMOGLOBIN ALBUMIN TRT | ALBUMIN          | 0.980        | 0.967                    | 0.993                    | 0.0026  | 6581.57 |
|                                                                      | Trt: High vs. Lo | 1.046        | 0.875                    | 1.251                    | 0.6188  |         |

## Top models for PCT\_CHG\_50 predicting DAYS\_DEATH\_90

| Model Variables                                                                      | Predictor        | Hazard Ratio | HR 95% CI<br>Lower Bound | HR 95% CI<br>Upper Bound | p-value | AIC     |
|--------------------------------------------------------------------------------------|------------------|--------------|--------------------------|--------------------------|---------|---------|
| PCT_CHG_50 AGE SOFA PLAT_COUNT<br>SEPSIS INR HAEMOGLOBIN ALBUMIN                     | PCT_CHG_50       | 1.528        | 1.257                    | 1.858                    | <.0001  | 6576.84 |
|                                                                                      | AGE              | 1.019        | 1.012                    | 1.026                    | <.0001  |         |
|                                                                                      | SOFA             | 1.234        | 1.061                    | 1.436                    | 0.0065  |         |
|                                                                                      | PLAT_COUNT       | 0.998        | 0.997                    | 0.999                    | <.0001  |         |
|                                                                                      | SEPSIS           | 1.242        | 1.030                    | 1.498                    | 0.0231  |         |
|                                                                                      | INR              | 1.092        | 1.013                    | 1.176                    | 0.0215  |         |
|                                                                                      | HAEMOGLOBIN      | 0.993        | 0.988                    | 0.998                    | 0.0042  |         |
|                                                                                      | ALBUMIN          | 0.980        | 0.967                    | 0.993                    | 0.0026  |         |
| PCT_CHG_50 AGE SEX SOFA PLAT_COUNT<br>SEPSIS INR HAEMOGLOBIN ALBUMIN                 | PCT_CHG_50       | 1.535        | 1.262                    | 1.868                    | <.0001  | 6578.35 |
|                                                                                      | AGE              | 1.019        | 1.012                    | 1.026                    | <.0001  |         |
|                                                                                      | Female vs. Male  | 0.935        | 0.773                    | 1.131                    | 0.4875  |         |
|                                                                                      | SOFA             | 1.233        | 1.060                    | 1.435                    | 0.0066  |         |
|                                                                                      | PLAT_COUNT       | 0.998        | 0.997                    | 0.999                    | <.0001  |         |
|                                                                                      | SEPSIS           | 1.246        | 1.033                    | 1.503                    | 0.0214  |         |
|                                                                                      | INR              | 1.094        | 1.015                    | 1.179                    | 0.0191  |         |
|                                                                                      | HAEMOGLOBIN      | 0.993        | 0.987                    | 0.998                    | 0.0039  |         |
|                                                                                      | ALBUMIN          | 0.979        | 0.966                    | 0.993                    | 0.0024  |         |
| PCT_CHG_50 AGE SOFA PLAT_COUNT<br>SEPSIS INR HAEMOGLOBIN<br>WHITE_CELL_COUNT ALBUMIN | PCT_CHG_50       | 1.523        | 1.251                    | 1.852                    | <.0001  | 6578.61 |
|                                                                                      | AGE              | 1.019        | 1.012                    | 1.026                    | <.0001  |         |
|                                                                                      | SOFA             | 1.233        | 1.059                    | 1.435                    | 0.0068  |         |
|                                                                                      | PLAT_COUNT       | 0.998        | 0.997                    | 0.999                    | <.0001  |         |
|                                                                                      | SEPSIS           | 1.238        | 1.027                    | 1.494                    | 0.0254  |         |
|                                                                                      | INR              | 1.092        | 1.014                    | 1.177                    | 0.0207  |         |
|                                                                                      | HAEMOGLOBIN      | 0.993        | 0.988                    | 0.998                    | 0.0043  |         |
|                                                                                      | WHITE_CELL_COUNT | 1.001        | 0.998                    | 1.004                    | 0.6009  |         |
|                                                                                      | ALBUMIN          | 0.979        | 0.966                    | 0.993                    | 0.0025  |         |
| PCT_CHG_50 AGE SOFA PLAT_COUNT<br>SEPSIS INR HAEMOGLOBIN ALBUMIN TRT                 | PCT_CHG_50       | 1.527        | 1.256                    | 1.857                    | <.0001  | 6578.76 |
|                                                                                      | AGE              | 1.019        | 1.012                    | 1.026                    | <.0001  |         |
|                                                                                      | SOFA             | 1.234        | 1.060                    | 1.435                    | 0.0065  |         |
|                                                                                      | PLAT_COUNT       | 0.998        | 0.997                    | 0.999                    | <.0001  |         |
|                                                                                      | SEPSIS           | 1.242        | 1.030                    | 1.498                    | 0.0231  |         |
|                                                                                      | INR              | 1.092        | 1.013                    | 1.177                    | 0.0211  |         |
|                                                                                      | HAEMOGLOBIN      | 0.993        | 0.987                    | 0.998                    | 0.0042  |         |

Top models for PCT\_CHG\_50 predicting DAYS\_DEATH\_90

| Model Variables                                                      | Predictor        | Hazard Ratio | HR 95% CI<br>Lower Bound | HR 95% CI<br>Upper Bound | p-value | AIC     |
|----------------------------------------------------------------------|------------------|--------------|--------------------------|--------------------------|---------|---------|
| PCT_CHG_50 AGE SOFA PLAT_COUNT<br>SEPSIS INR HAEMOGLOBIN ALBUMIN TRT | ALBUMIN          | 0.980        | 0.967                    | 0.993                    | 0.0027  | 6578.76 |
|                                                                      | Trt: High vs. Lo | 1.027        | 0.859                    | 1.227                    | 0.7724  |         |

## Top models for PCT\_CHG\_60 predicting DAYS\_DEATH\_90

| Model Variables                                                                      | Predictor        | Hazard Ratio | HR 95% CI<br>Lower Bound | HR 95% CI<br>Upper Bound | p-value | AIC     |
|--------------------------------------------------------------------------------------|------------------|--------------|--------------------------|--------------------------|---------|---------|
| PCT_CHG_60 AGE SOFA PLAT_COUNT<br>SEPSIS INR HAEMOGLOBIN ALBUMIN                     | PCT_CHG_60       | 1.464        | 1.175                    | 1.825                    | 0.0007  | 6583.38 |
|                                                                                      | AGE              | 1.019        | 1.012                    | 1.026                    | <.0001  |         |
|                                                                                      | SOFA             | 1.262        | 1.088                    | 1.465                    | 0.0022  |         |
|                                                                                      | PLAT_COUNT       | 0.998        | 0.997                    | 0.999                    | <.0001  |         |
|                                                                                      | SEPSIS           | 1.258        | 1.043                    | 1.516                    | 0.0163  |         |
|                                                                                      | INR              | 1.097        | 1.019                    | 1.180                    | 0.0136  |         |
|                                                                                      | HAEMOGLOBIN      | 0.993        | 0.988                    | 0.998                    | 0.0061  |         |
|                                                                                      | ALBUMIN          | 0.980        | 0.967                    | 0.993                    | 0.0030  |         |
| PCT_CHG_60 AGE SEX SOFA PLAT_COUNT<br>SEPSIS INR HAEMOGLOBIN ALBUMIN                 | PCT_CHG_60       | 1.471        | 1.180                    | 1.835                    | 0.0006  | 6584.99 |
|                                                                                      | AGE              | 1.019        | 1.012                    | 1.026                    | <.0001  |         |
|                                                                                      | Female vs. Male  | 0.941        | 0.778                    | 1.138                    | 0.5291  |         |
|                                                                                      | SOFA             | 1.261        | 1.087                    | 1.464                    | 0.0022  |         |
|                                                                                      | PLAT_COUNT       | 0.998        | 0.997                    | 0.999                    | <.0001  |         |
|                                                                                      | SEPSIS           | 1.261        | 1.046                    | 1.521                    | 0.0151  |         |
|                                                                                      | INR              | 1.098        | 1.021                    | 1.182                    | 0.0122  |         |
|                                                                                      | HAEMOGLOBIN      | 0.993        | 0.988                    | 0.998                    | 0.0058  |         |
|                                                                                      | ALBUMIN          | 0.980        | 0.967                    | 0.993                    | 0.0028  |         |
| PCT_CHG_60 AGE SOFA PLAT_COUNT<br>SEPSIS INR HAEMOGLOBIN<br>WHITE_CELL_COUNT ALBUMIN | PCT_CHG_60       | 1.457        | 1.168                    | 1.818                    | 0.0009  | 6585.10 |
|                                                                                      | AGE              | 1.019        | 1.012                    | 1.026                    | <.0001  |         |
|                                                                                      | SOFA             | 1.261        | 1.086                    | 1.464                    | 0.0023  |         |
|                                                                                      | PLAT_COUNT       | 0.998        | 0.997                    | 0.999                    | <.0001  |         |
|                                                                                      | SEPSIS           | 1.253        | 1.039                    | 1.512                    | 0.0183  |         |
|                                                                                      | INR              | 1.097        | 1.020                    | 1.180                    | 0.0131  |         |
|                                                                                      | HAEMOGLOBIN      | 0.993        | 0.988                    | 0.998                    | 0.0062  |         |
|                                                                                      | WHITE_CELL_COUNT | 1.001        | 0.998                    | 1.004                    | 0.5648  |         |
|                                                                                      | ALBUMIN          | 0.980        | 0.967                    | 0.993                    | 0.0028  |         |
| PCT_CHG_60 AGE SOFA PLAT_COUNT<br>SEPSIS INR HAEMOGLOBIN ALBUMIN TRT                 | PCT_CHG_60       | 1.464        | 1.174                    | 1.825                    | 0.0007  | 6585.28 |
|                                                                                      | AGE              | 1.019        | 1.012                    | 1.026                    | <.0001  |         |
|                                                                                      | SOFA             | 1.262        | 1.087                    | 1.464                    | 0.0022  |         |
|                                                                                      | PLAT_COUNT       | 0.998        | 0.997                    | 0.999                    | <.0001  |         |
|                                                                                      | SEPSIS           | 1.258        | 1.043                    | 1.516                    | 0.0163  |         |
|                                                                                      | INR              | 1.097        | 1.019                    | 1.180                    | 0.0133  |         |
|                                                                                      | HAEMOGLOBIN      | 0.993        | 0.988                    | 0.998                    | 0.0061  |         |

Top models for PCT\_CHG\_60 predicting DAYS\_DEATH\_90

| Model Variables                                                      | Predictor        | Hazard Ratio | HR 95% CI<br>Lower Bound | HR 95% CI<br>Upper Bound | p-value | AIC     |
|----------------------------------------------------------------------|------------------|--------------|--------------------------|--------------------------|---------|---------|
| PCT_CHG_60 AGE SOFA PLAT_COUNT<br>SEPSIS INR HAEMOGLOBIN ALBUMIN TRT | ALBUMIN          | 0.980        | 0.967                    | 0.993                    | 0.0031  | 6585.28 |
|                                                                      | Trt: High vs. Lo | 1.030        | 0.862                    | 1.231                    | 0.7431  |         |



## Top models for NADIR\_GE100 predicting DAYS\_DEATH\_90

| Model Variables                                                                 | Predictor        | Hazard Ratio | HR 95% CI Lower Bound | HR 95% CI Upper Bound | p-value | AIC     |
|---------------------------------------------------------------------------------|------------------|--------------|-----------------------|-----------------------|---------|---------|
| NADIR_GE100 AGE SOFA PLAT_COUNT SEPSIS INR HAEMOGLOBIN ALBUMIN                  | NADIR_GE100      | 0.653        | 0.515                 | 0.828                 | 0.0004  | 6581.69 |
|                                                                                 | AGE              | 1.020        | 1.013                 | 1.027                 | <.0001  |         |
|                                                                                 | SOFA             | 1.234        | 1.057                 | 1.441                 | 0.0076  |         |
|                                                                                 | PLAT_COUNT       | 0.999        | 0.998                 | 1.000                 | 0.1110  |         |
|                                                                                 | SEPSIS           | 1.254        | 1.041                 | 1.512                 | 0.0172  |         |
|                                                                                 | INR              | 1.097        | 1.020                 | 1.180                 | 0.0124  |         |
|                                                                                 | HAEMOGLOBIN      | 0.993        | 0.988                 | 0.998                 | 0.0088  |         |
|                                                                                 | ALBUMIN          | 0.979        | 0.966                 | 0.992                 | 0.0017  |         |
| NADIR_GE100 AGE SOFA PLAT_COUNT SEPSIS INR HAEMOGLOBIN WHITE_CELL_COUNT ALBUMIN | NADIR_GE100      | 0.654        | 0.516                 | 0.829                 | 0.0005  | 6583.18 |
|                                                                                 | AGE              | 1.020        | 1.013                 | 1.027                 | <.0001  |         |
|                                                                                 | SOFA             | 1.232        | 1.055                 | 1.438                 | 0.0082  |         |
|                                                                                 | PLAT_COUNT       | 0.999        | 0.998                 | 1.000                 | 0.1009  |         |
|                                                                                 | SEPSIS           | 1.248        | 1.036                 | 1.505                 | 0.0200  |         |
|                                                                                 | INR              | 1.098        | 1.021                 | 1.181                 | 0.0120  |         |
|                                                                                 | HAEMOGLOBIN      | 0.993        | 0.988                 | 0.998                 | 0.0088  |         |
|                                                                                 | WHITE_CELL_COUNT | 1.001        | 0.998                 | 1.004                 | 0.4282  |         |
|                                                                                 | ALBUMIN          | 0.979        | 0.966                 | 0.992                 | 0.0015  |         |
| NADIR_GE100 AGE SEX SOFA PLAT_COUNT SEPSIS INR HAEMOGLOBIN ALBUMIN              | NADIR_GE100      | 0.650        | 0.513                 | 0.825                 | 0.0004  | 6583.32 |
|                                                                                 | AGE              | 1.020        | 1.013                 | 1.027                 | <.0001  |         |
|                                                                                 | Female vs. Male  | 0.943        | 0.780                 | 1.141                 | 0.5479  |         |
|                                                                                 | SOFA             | 1.234        | 1.057                 | 1.440                 | 0.0077  |         |
|                                                                                 | PLAT_COUNT       | 0.999        | 0.998                 | 1.000                 | 0.1223  |         |
|                                                                                 | SEPSIS           | 1.258        | 1.044                 | 1.516                 | 0.0160  |         |
|                                                                                 | INR              | 1.099        | 1.022                 | 1.183                 | 0.0112  |         |
|                                                                                 | HAEMOGLOBIN      | 0.993        | 0.988                 | 0.998                 | 0.0083  |         |
|                                                                                 | ALBUMIN          | 0.979        | 0.966                 | 0.992                 | 0.0016  |         |
| NADIR_GE100 AGE SOFA PLAT_COUNT SEPSIS INR HAEMOGLOBIN ALBUMIN TRT              | NADIR_GE100      | 0.651        | 0.513                 | 0.826                 | 0.0004  | 6583.43 |
|                                                                                 | AGE              | 1.020        | 1.013                 | 1.027                 | <.0001  |         |
|                                                                                 | SOFA             | 1.233        | 1.056                 | 1.438                 | 0.0079  |         |
|                                                                                 | PLAT_COUNT       | 0.999        | 0.998                 | 1.000                 | 0.1102  |         |
|                                                                                 | SEPSIS           | 1.254        | 1.041                 | 1.511                 | 0.0173  |         |
|                                                                                 | INR              | 1.097        | 1.020                 | 1.180                 | 0.0123  |         |
|                                                                                 | HAEMOGLOBIN      | 0.993        | 0.988                 | 0.998                 | 0.0087  |         |

Top models for NADIR\_GE100 predicting DAYS\_DEATH\_90

| Model Variables                                                       | Predictor        | Hazard Ratio | HR 95% CI<br>Lower Bound | HR 95% CI<br>Upper Bound | p-value | AIC     |
|-----------------------------------------------------------------------|------------------|--------------|--------------------------|--------------------------|---------|---------|
| NADIR_GE100 AGE SOFA PLAT_COUNT<br>SEPSIS INR HAEMOGLOBIN ALBUMIN TRT | ALBUMIN          | 0.979        | 0.966                    | 0.992                    | 0.0017  | 6583.43 |
|                                                                       | Trt: High vs. Lo | 1.048        | 0.877                    | 1.252                    | 0.6094  |         |

| Model Variables                                              | Predictor        | Hazard Ratio | HR 95% CI Lower Bound | HR 95% CI Upper Bound | p-value | AIC     |
|--------------------------------------------------------------|------------------|--------------|-----------------------|-----------------------|---------|---------|
| PCT_CHG_30 AGE SOFA INR HAEMOGLOBIN ALBUMIN                  | PCT_CHG_30       | 0.859        | 0.755                 | 0.978                 | 0.0214  | 12376.3 |
|                                                              | AGE              | 1.007        | 1.003                 | 1.011                 | 0.0009  |         |
|                                                              | SOFA             | 0.853        | 0.773                 | 0.940                 | 0.0014  |         |
|                                                              | INR              | 0.998        | 0.931                 | 1.071                 | 0.9594  |         |
|                                                              | HAEMOGLOBIN      | 1.004        | 1.001                 | 1.008                 | 0.0095  |         |
|                                                              | ALBUMIN          | 1.006        | 0.997                 | 1.015                 | 0.2204  |         |
| PCT_CHG_30 AGE SOFA SEPSIS INR HAEMOGLOBIN ALBUMIN           | PCT_CHG_30       | 0.855        | 0.751                 | 0.973                 | 0.0176  | 12376.3 |
|                                                              | AGE              | 1.007        | 1.003                 | 1.011                 | 0.0011  |         |
|                                                              | SOFA             | 0.851        | 0.771                 | 0.938                 | 0.0012  |         |
|                                                              | SEPSIS           | 1.097        | 0.964                 | 1.249                 | 0.1613  |         |
|                                                              | INR              | 0.997        | 0.929                 | 1.070                 | 0.9318  |         |
|                                                              | HAEMOGLOBIN      | 1.004        | 1.001                 | 1.008                 | 0.0121  |         |
|                                                              | ALBUMIN          | 1.008        | 0.998                 | 1.017                 | 0.1176  |         |
| PCT_CHG_30 AGE SOFA INR HAEMOGLOBIN WHITE_CELL_COUNT ALBUMIN | PCT_CHG_30       | 0.854        | 0.750                 | 0.972                 | 0.0171  | 12376.7 |
|                                                              | AGE              | 1.007        | 1.003                 | 1.011                 | 0.0010  |         |
|                                                              | SOFA             | 0.852        | 0.773                 | 0.939                 | 0.0013  |         |
|                                                              | INR              | 0.998        | 0.930                 | 1.071                 | 0.9566  |         |
|                                                              | HAEMOGLOBIN      | 1.004        | 1.001                 | 1.008                 | 0.0102  |         |
|                                                              | WHITE_CELL_COUNT | 1.002        | 0.999                 | 1.005                 | 0.1296  |         |
|                                                              | ALBUMIN          | 1.006        | 0.996                 | 1.015                 | 0.2267  |         |
| PCT_CHG_30 AGE SEX SOFA INR HAEMOGLOBIN ALBUMIN              | PCT_CHG_30       | 0.857        | 0.753                 | 0.975                 | 0.0193  | 12376.7 |
|                                                              | AGE              | 1.007        | 1.003                 | 1.011                 | 0.0008  |         |
|                                                              | Female vs. Male  | 1.089        | 0.954                 | 1.242                 | 0.2071  |         |
|                                                              | SOFA             | 0.852        | 0.773                 | 0.939                 | 0.0013  |         |
|                                                              | INR              | 0.993        | 0.925                 | 1.066                 | 0.8484  |         |
|                                                              | HAEMOGLOBIN      | 1.004        | 1.001                 | 1.008                 | 0.0088  |         |
|                                                              | ALBUMIN          | 1.006        | 0.997                 | 1.015                 | 0.1995  |         |
| PCT_CHG_30 AGE SEX SOFA SEPSIS INR HAEMOGLOBIN ALBUMIN       | PCT_CHG_30       | 0.853        | 0.749                 | 0.971                 | 0.0160  | 12376.9 |
|                                                              | AGE              | 1.007        | 1.003                 | 1.011                 | 0.0009  |         |
|                                                              | Female vs. Male  | 1.084        | 0.950                 | 1.237                 | 0.2304  |         |
|                                                              | SOFA             | 0.850        | 0.771                 | 0.937                 | 0.0011  |         |
|                                                              | SEPSIS           | 1.093        | 0.960                 | 1.245                 | 0.1784  |         |
|                                                              | INR              | 0.992        | 0.924                 | 1.065                 | 0.8289  |         |
|                                                              | HAEMOGLOBIN      | 1.004        | 1.001                 | 1.008                 | 0.0110  |         |

| Model Variables                                                         | Predictor        | Hazard Ratio | HR 95% CI Lower Bound | HR 95% CI Upper Bound | p-value | AIC     |
|-------------------------------------------------------------------------|------------------|--------------|-----------------------|-----------------------|---------|---------|
| PCT_CHG_30 AGE SEX SOFA SEPSIS INR HAEMOGLOBIN ALBUMIN                  | ALBUMIN          | 1.008        | 0.998                 | 1.018                 | 0.1088  | 12376.9 |
| PCT_CHG_30 AGE SOFA SEPSIS INR HAEMOGLOBIN WHITE_CELL_COUNT ALBUMIN     | PCT_CHG_30       | 0.850        | 0.747                 | 0.968                 | 0.0144  | 12377.0 |
|                                                                         | AGE              | 1.007        | 1.003                 | 1.011                 | 0.0012  |         |
|                                                                         | SOFA             | 0.850        | 0.771                 | 0.938                 | 0.0012  |         |
|                                                                         | SEPSIS           | 1.091        | 0.958                 | 1.242                 | 0.1915  |         |
|                                                                         | INR              | 0.997        | 0.929                 | 1.070                 | 0.9320  |         |
|                                                                         | HAEMOGLOBIN      | 1.004        | 1.001                 | 1.008                 | 0.0127  |         |
|                                                                         | WHITE_CELL_COUNT | 1.002        | 0.999                 | 1.005                 | 0.1695  |         |
|                                                                         | ALBUMIN          | 1.007        | 0.998                 | 1.017                 | 0.1275  |         |
| PCT_CHG_30 AGE SEX SOFA INR HAEMOGLOBIN WHITE_CELL_COUNT ALBUMIN        | PCT_CHG_30       | 0.852        | 0.748                 | 0.970                 | 0.0153  | 12377.0 |
|                                                                         | AGE              | 1.007        | 1.003                 | 1.011                 | 0.0009  |         |
|                                                                         | Female vs. Male  | 1.090        | 0.956                 | 1.244                 | 0.1983  |         |
|                                                                         | SOFA             | 0.851        | 0.772                 | 0.939                 | 0.0012  |         |
|                                                                         | INR              | 0.993        | 0.925                 | 1.066                 | 0.8434  |         |
|                                                                         | HAEMOGLOBIN      | 1.004        | 1.001                 | 1.008                 | 0.0094  |         |
|                                                                         | WHITE_CELL_COUNT | 1.002        | 0.999                 | 1.005                 | 0.1214  |         |
|                                                                         | ALBUMIN          | 1.006        | 0.997                 | 1.015                 | 0.2050  |         |
| PCT_CHG_30 AGE SEX SOFA SEPSIS INR HAEMOGLOBIN WHITE_CELL_COUNT ALBUMIN | PCT_CHG_30       | 0.848        | 0.745                 | 0.966                 | 0.0129  | 12377.5 |
|                                                                         | AGE              | 1.007        | 1.003                 | 1.011                 | 0.0010  |         |
|                                                                         | Female vs. Male  | 1.086        | 0.952                 | 1.239                 | 0.2200  |         |
|                                                                         | SOFA             | 0.850        | 0.770                 | 0.937                 | 0.0011  |         |
|                                                                         | SEPSIS           | 1.087        | 0.954                 | 1.238                 | 0.2120  |         |
|                                                                         | INR              | 0.992        | 0.924                 | 1.065                 | 0.8266  |         |
|                                                                         | HAEMOGLOBIN      | 1.004        | 1.001                 | 1.008                 | 0.0116  |         |
|                                                                         | WHITE_CELL_COUNT | 1.002        | 0.999                 | 1.005                 | 0.1584  |         |
|                                                                         | ALBUMIN          | 1.008        | 0.998                 | 1.017                 | 0.1181  |         |
| PCT_CHG_30 AGE SOFA INR HAEMOGLOBIN ALBUMIN TRT                         | PCT_CHG_30       | 0.856        | 0.751                 | 0.974                 | 0.0184  | 12377.7 |
|                                                                         | AGE              | 1.007        | 1.003                 | 1.011                 | 0.0010  |         |
|                                                                         | SOFA             | 0.852        | 0.773                 | 0.940                 | 0.0013  |         |
|                                                                         | INR              | 0.996        | 0.929                 | 1.069                 | 0.9199  |         |
|                                                                         | HAEMOGLOBIN      | 1.005        | 1.001                 | 1.008                 | 0.0084  |         |
|                                                                         | ALBUMIN          | 1.006        | 0.997                 | 1.015                 | 0.2178  |         |
|                                                                         | Trt: High vs. Lo | 0.951        | 0.839                 | 1.078                 | 0.4316  |         |

| Model Variables                                                     | Predictor        | Hazard Ratio | HR 95% CI Lower Bound | HR 95% CI Upper Bound | p-value | AIC     |
|---------------------------------------------------------------------|------------------|--------------|-----------------------|-----------------------|---------|---------|
| PCT_CHG_30 AGE SOFA SEPSIS INR<br>HAEMOGLOBIN ALBUMIN TRT           | PCT_CHG_30       | 0.852        | 0.748                 | 0.970                 | 0.0152  | 12377.7 |
|                                                                     | AGE              | 1.007        | 1.003                 | 1.011                 | 0.0012  |         |
|                                                                     | SOFA             | 0.850        | 0.771                 | 0.938                 | 0.0012  |         |
|                                                                     | SEPSIS           | 1.097        | 0.963                 | 1.249                 | 0.1633  |         |
|                                                                     | INR              | 0.995        | 0.927                 | 1.068                 | 0.8921  |         |
|                                                                     | HAEMOGLOBIN      | 1.004        | 1.001                 | 1.008                 | 0.0108  |         |
|                                                                     | ALBUMIN          | 1.008        | 0.998                 | 1.017                 | 0.1164  |         |
|                                                                     | Trt: High vs. Lo | 0.952        | 0.840                 | 1.079                 | 0.4387  |         |
| PCT_CHG_30 AGE SEX SOFA INR<br>HAEMOGLOBIN ALBUMIN TRT              | PCT_CHG_30       | 0.853        | 0.749                 | 0.971                 | 0.0164  | 12378.1 |
|                                                                     | AGE              | 1.007        | 1.003                 | 1.011                 | 0.0009  |         |
|                                                                     | Female vs. Male  | 1.090        | 0.955                 | 1.244                 | 0.2008  |         |
|                                                                     | SOFA             | 0.851        | 0.772                 | 0.939                 | 0.0012  |         |
|                                                                     | INR              | 0.991        | 0.924                 | 1.064                 | 0.8078  |         |
|                                                                     | HAEMOGLOBIN      | 1.005        | 1.001                 | 1.008                 | 0.0077  |         |
|                                                                     | ALBUMIN          | 1.006        | 0.997                 | 1.015                 | 0.1962  |         |
|                                                                     | Trt: High vs. Lo | 0.949        | 0.838                 | 1.076                 | 0.4157  |         |
| PCT_CHG_30 AGE SOFA INR HAEMOGLOBIN<br>WHITE_CELL_COUNT ALBUMIN TRT | PCT_CHG_30       | 0.851        | 0.747                 | 0.969                 | 0.0147  | 12378.1 |
|                                                                     | AGE              | 1.007        | 1.003                 | 1.011                 | 0.0011  |         |
|                                                                     | SOFA             | 0.851        | 0.772                 | 0.939                 | 0.0013  |         |
|                                                                     | INR              | 0.996        | 0.929                 | 1.069                 | 0.9172  |         |
|                                                                     | HAEMOGLOBIN      | 1.004        | 1.001                 | 1.008                 | 0.0091  |         |
|                                                                     | WHITE_CELL_COUNT | 1.002        | 0.999                 | 1.005                 | 0.1317  |         |
|                                                                     | ALBUMIN          | 1.006        | 0.996                 | 1.015                 | 0.2241  |         |
|                                                                     | Trt: High vs. Lo | 0.952        | 0.840                 | 1.078                 | 0.4378  |         |
| PCT_CHG_30 AGE SEX SOFA SEPSIS INR<br>HAEMOGLOBIN ALBUMIN TRT       | PCT_CHG_30       | 0.849        | 0.746                 | 0.967                 | 0.0137  | 12378.3 |
|                                                                     | AGE              | 1.007        | 1.003                 | 1.011                 | 0.0010  |         |
|                                                                     | Female vs. Male  | 1.086        | 0.951                 | 1.239                 | 0.2229  |         |
|                                                                     | SOFA             | 0.849        | 0.770                 | 0.937                 | 0.0011  |         |
|                                                                     | SEPSIS           | 1.093        | 0.960                 | 1.244                 | 0.1804  |         |
|                                                                     | INR              | 0.990        | 0.922                 | 1.063                 | 0.7879  |         |
|                                                                     | HAEMOGLOBIN      | 1.004        | 1.001                 | 1.008                 | 0.0098  |         |
|                                                                     | ALBUMIN          | 1.008        | 0.998                 | 1.018                 | 0.1071  |         |
|                                                                     | Trt: High vs. Lo | 0.950        | 0.838                 | 1.076                 | 0.4215  |         |

| Model Variables                                           | Predictor   | Hazard Ratio | HR 95% CI<br>Lower Bound | HR 95% CI<br>Upper Bound | p-value | AIC     |
|-----------------------------------------------------------|-------------|--------------|--------------------------|--------------------------|---------|---------|
| PCT_CHG_30 AGE SOFA PLAT_COUNT INR<br>HAEMOGLOBIN ALBUMIN | PCT_CHG_30  | 0.858        | 0.752                    | 0.980                    | 0.0236  | 12378.3 |
|                                                           | AGE         | 1.007        | 1.003                    | 1.011                    | 0.0010  |         |
|                                                           | SOFA        | 0.854        | 0.767                    | 0.951                    | 0.0041  |         |
|                                                           | PLAT_COUNT  | 1.000        | 0.999                    | 1.001                    | 0.9354  |         |
|                                                           | INR         | 0.998        | 0.931                    | 1.071                    | 0.9622  |         |
|                                                           | HAEMOGLOBIN | 1.004        | 1.001                    | 1.008                    | 0.0095  |         |
|                                                           | ALBUMIN     | 1.006        | 0.997                    | 1.015                    | 0.2197  |         |

| Model Variables                                                  | Predictor       | Hazard Ratio | HR 95% CI Lower Bound | HR 95% CI Upper Bound | p-value | AIC     |
|------------------------------------------------------------------|-----------------|--------------|-----------------------|-----------------------|---------|---------|
| PCT_CHG_40 AGE SOFA INR HAEMOGLOBIN ALBUMIN                      | PCT_CHG_40      | 0.877        | 0.766                 | 1.004                 | 0.0580  | 12378.0 |
|                                                                  | AGE             | 1.007        | 1.003                 | 1.012                 | 0.0006  |         |
|                                                                  | SOFA            | 0.857        | 0.777                 | 0.945                 | 0.0020  |         |
|                                                                  | INR             | 0.994        | 0.927                 | 1.066                 | 0.8738  |         |
|                                                                  | HAEMOGLOBIN     | 1.004        | 1.001                 | 1.008                 | 0.0106  |         |
|                                                                  | ALBUMIN         | 1.005        | 0.996                 | 1.015                 | 0.2602  |         |
| PCT_CHG_40 AGE SEX SOFA INR HAEMOGLOBIN ALBUMIN                  | PCT_CHG_40      | 0.868        | 0.758                 | 0.995                 | 0.0420  | 12378.0 |
|                                                                  | AGE             | 1.008        | 1.003                 | 1.012                 | 0.0005  |         |
|                                                                  | Female vs. Male | 1.099        | 0.963                 | 1.255                 | 0.1614  |         |
|                                                                  | SOFA            | 0.856        | 0.777                 | 0.945                 | 0.0019  |         |
|                                                                  | INR             | 0.989        | 0.922                 | 1.061                 | 0.7640  |         |
|                                                                  | HAEMOGLOBIN     | 1.004        | 1.001                 | 1.008                 | 0.0092  |         |
|                                                                  | ALBUMIN         | 1.006        | 0.996                 | 1.015                 | 0.2381  |         |
| PCT_CHG_40 AGE SOFA SEPSIS INR HAEMOGLOBIN ALBUMIN               | PCT_CHG_40      | 0.873        | 0.762                 | 0.999                 | 0.0487  | 12378.1 |
|                                                                  | AGE             | 1.007        | 1.003                 | 1.012                 | 0.0007  |         |
|                                                                  | SOFA            | 0.855        | 0.775                 | 0.943                 | 0.0018  |         |
|                                                                  | SEPSIS          | 1.096        | 0.963                 | 1.248                 | 0.1663  |         |
|                                                                  | INR             | 0.993        | 0.926                 | 1.065                 | 0.8457  |         |
|                                                                  | HAEMOGLOBIN     | 1.004        | 1.001                 | 1.008                 | 0.0134  |         |
|                                                                  | ALBUMIN         | 1.007        | 0.998                 | 1.017                 | 0.1439  |         |
| PCT_CHG_40 AGE SEX SOFA SEPSIS INR HAEMOGLOBIN ALBUMIN           | PCT_CHG_40      | 0.864        | 0.754                 | 0.990                 | 0.0357  | 12378.3 |
|                                                                  | AGE             | 1.007        | 1.003                 | 1.012                 | 0.0005  |         |
|                                                                  | Female vs. Male | 1.095        | 0.959                 | 1.251                 | 0.1796  |         |
|                                                                  | SOFA            | 0.855        | 0.775                 | 0.943                 | 0.0017  |         |
|                                                                  | SEPSIS          | 1.092        | 0.959                 | 1.243                 | 0.1848  |         |
|                                                                  | INR             | 0.988        | 0.921                 | 1.061                 | 0.7431  |         |
|                                                                  | HAEMOGLOBIN     | 1.004        | 1.001                 | 1.008                 | 0.0115  |         |
|                                                                  | ALBUMIN         | 1.007        | 0.998                 | 1.017                 | 0.1346  |         |
| PCT_CHG_40 AGE SEX SOFA INR HAEMOGLOBIN WHITE_CELL_COUNT ALBUMIN | PCT_CHG_40      | 0.863        | 0.753                 | 0.989                 | 0.0342  | 12378.4 |
|                                                                  | AGE             | 1.008        | 1.003                 | 1.012                 | 0.0005  |         |
|                                                                  | Female vs. Male | 1.102        | 0.965                 | 1.258                 | 0.1528  |         |
|                                                                  | SOFA            | 0.856        | 0.776                 | 0.944                 | 0.0019  |         |
|                                                                  | INR             | 0.989        | 0.922                 | 1.061                 | 0.7574  |         |
|                                                                  | HAEMOGLOBIN     | 1.004        | 1.001                 | 1.008                 | 0.0099  |         |

| Model Variables                                                               | Predictor        | Hazard Ratio | HR 95% CI Lower Bound | HR 95% CI Upper Bound | p-value | AIC     |
|-------------------------------------------------------------------------------|------------------|--------------|-----------------------|-----------------------|---------|---------|
| PCT_CHG_40 AGE SEX SOFA INR<br>HAEMOGLOBIN WHITE_CELL_COUNT<br>ALBUMIN        | WHITE_CELL_COUNT | 1.002        | 0.999                 | 1.005                 | 0.1293  | 12378.4 |
|                                                                               | ALBUMIN          | 1.006        | 0.996                 | 1.015                 | 0.2464  |         |
| PCT_CHG_40 AGE SOFA INR HAEMOGLOBIN<br>WHITE_CELL_COUNT ALBUMIN               | PCT_CHG_40       | 0.872        | 0.761                 | 0.999                 | 0.0481  | 12378.4 |
|                                                                               | AGE              | 1.007        | 1.003                 | 1.012                 | 0.0006  |         |
|                                                                               | SOFA             | 0.856        | 0.776                 | 0.945                 | 0.0019  |         |
|                                                                               | INR              | 0.994        | 0.927                 | 1.066                 | 0.8696  |         |
|                                                                               | HAEMOGLOBIN      | 1.004        | 1.001                 | 1.008                 | 0.0114  |         |
|                                                                               | WHITE_CELL_COUNT | 1.002        | 0.999                 | 1.005                 | 0.1409  |         |
|                                                                               | ALBUMIN          | 1.005        | 0.996                 | 1.015                 | 0.2695  |         |
| PCT_CHG_40 AGE SOFA SEPSIS INR<br>HAEMOGLOBIN WHITE_CELL_COUNT<br>ALBUMIN     | PCT_CHG_40       | 0.868        | 0.758                 | 0.994                 | 0.0412  | 12378.8 |
|                                                                               | AGE              | 1.007        | 1.003                 | 1.012                 | 0.0007  |         |
|                                                                               | SOFA             | 0.855        | 0.775                 | 0.943                 | 0.0018  |         |
|                                                                               | SEPSIS           | 1.090        | 0.957                 | 1.241                 | 0.1966  |         |
|                                                                               | INR              | 0.993        | 0.926                 | 1.065                 | 0.8445  |         |
|                                                                               | HAEMOGLOBIN      | 1.004        | 1.001                 | 1.008                 | 0.0140  |         |
|                                                                               | WHITE_CELL_COUNT | 1.002        | 0.999                 | 1.005                 | 0.1828  |         |
|                                                                               | ALBUMIN          | 1.007        | 0.997                 | 1.017                 | 0.1566  |         |
| PCT_CHG_40 AGE SEX SOFA SEPSIS INR<br>HAEMOGLOBIN WHITE_CELL_COUNT<br>ALBUMIN | PCT_CHG_40       | 0.859        | 0.750                 | 0.985                 | 0.0297  | 12378.9 |
|                                                                               | AGE              | 1.007        | 1.003                 | 1.012                 | 0.0006  |         |
|                                                                               | Female vs. Male  | 1.097        | 0.961                 | 1.253                 | 0.1698  |         |
|                                                                               | SOFA             | 0.854        | 0.775                 | 0.943                 | 0.0017  |         |
|                                                                               | SEPSIS           | 1.085        | 0.953                 | 1.236                 | 0.2191  |         |
|                                                                               | INR              | 0.988        | 0.921                 | 1.060                 | 0.7394  |         |
|                                                                               | HAEMOGLOBIN      | 1.004        | 1.001                 | 1.008                 | 0.0120  |         |
|                                                                               | WHITE_CELL_COUNT | 1.002        | 0.999                 | 1.005                 | 0.1677  |         |
|                                                                               | ALBUMIN          | 1.007        | 0.997                 | 1.017                 | 0.1467  |         |
| PCT_CHG_40 AGE SEX SOFA INR<br>HAEMOGLOBIN ALBUMIN TRT                        | PCT_CHG_40       | 0.865        | 0.755                 | 0.992                 | 0.0375  | 12379.5 |
|                                                                               | AGE              | 1.008        | 1.003                 | 1.012                 | 0.0005  |         |
|                                                                               | Female vs. Male  | 1.101        | 0.964                 | 1.257                 | 0.1551  |         |
|                                                                               | SOFA             | 0.856        | 0.776                 | 0.944                 | 0.0018  |         |
|                                                                               | INR              | 0.987        | 0.920                 | 1.060                 | 0.7258  |         |
|                                                                               | HAEMOGLOBIN      | 1.005        | 1.001                 | 1.008                 | 0.0082  |         |
|                                                                               | ALBUMIN          | 1.006        | 0.996                 | 1.015                 | 0.2353  |         |



| Model Variables                                                            | Predictor        | Hazard Ratio | HR 95% CI Lower Bound | HR 95% CI Upper Bound | p-value | AIC     |
|----------------------------------------------------------------------------|------------------|--------------|-----------------------|-----------------------|---------|---------|
| PCT_CHG_40 AGE SEX SOFA INR<br>HAEMOGLOBIN ALBUMIN TRT                     | Trt: High vs. Lo | 0.953        | 0.841                 | 1.079                 | 0.4477  | 12379.5 |
| PCT_CHG_40 AGE SOFA INR HAEMOGLOBIN<br>ALBUMIN TRT                         | PCT_CHG_40       | 0.875        | 0.764                 | 1.002                 | 0.0527  | 12379.5 |
|                                                                            | AGE              | 1.007        | 1.003                 | 1.012                 | 0.0006  |         |
|                                                                            | SOFA             | 0.856        | 0.776                 | 0.944                 | 0.0019  |         |
|                                                                            | INR              | 0.993        | 0.925                 | 1.065                 | 0.8370  |         |
|                                                                            | HAEMOGLOBIN      | 1.004        | 1.001                 | 1.008                 | 0.0096  |         |
|                                                                            | ALBUMIN          | 1.005        | 0.996                 | 1.015                 | 0.2583  |         |
|                                                                            | Trt: High vs. Lo | 0.955        | 0.843                 | 1.082                 | 0.4724  |         |
| PCT_CHG_40 AGE SOFA SEPSIS INR<br>HAEMOGLOBIN ALBUMIN TRT                  | PCT_CHG_40       | 0.870        | 0.760                 | 0.996                 | 0.0443  | 12379.6 |
|                                                                            | AGE              | 1.007        | 1.003                 | 1.012                 | 0.0007  |         |
|                                                                            | SOFA             | 0.854        | 0.774                 | 0.943                 | 0.0017  |         |
|                                                                            | SEPSIS           | 1.096        | 0.962                 | 1.248                 | 0.1677  |         |
|                                                                            | INR              | 0.991        | 0.924                 | 1.064                 | 0.8088  |         |
|                                                                            | HAEMOGLOBIN      | 1.004        | 1.001                 | 1.008                 | 0.0121  |         |
|                                                                            | ALBUMIN          | 1.007        | 0.998                 | 1.017                 | 0.1429  |         |
|                                                                            | Trt: High vs. Lo | 0.956        | 0.844                 | 1.083                 | 0.4778  |         |
| PCT_CHG_40 AGE SEX SOFA SEPSIS INR<br>HAEMOGLOBIN ALBUMIN TRT              | PCT_CHG_40       | 0.861        | 0.751                 | 0.987                 | 0.0319  | 12379.7 |
|                                                                            | AGE              | 1.007        | 1.003                 | 1.012                 | 0.0006  |         |
|                                                                            | Female vs. Male  | 1.097        | 0.961                 | 1.253                 | 0.1722  |         |
|                                                                            | SOFA             | 0.854        | 0.774                 | 0.942                 | 0.0017  |         |
|                                                                            | SEPSIS           | 1.092        | 0.959                 | 1.243                 | 0.1861  |         |
|                                                                            | INR              | 0.986        | 0.919                 | 1.059                 | 0.7048  |         |
|                                                                            | HAEMOGLOBIN      | 1.004        | 1.001                 | 1.008                 | 0.0103  |         |
|                                                                            | ALBUMIN          | 1.007        | 0.998                 | 1.017                 | 0.1330  |         |
|                                                                            | Trt: High vs. Lo | 0.953        | 0.841                 | 1.080                 | 0.4519  |         |
| PCT_CHG_40 AGE SEX SOFA INR<br>HAEMOGLOBIN WHITE_CELL_COUNT<br>ALBUMIN TRT | PCT_CHG_40       | 0.860        | 0.750                 | 0.986                 | 0.0305  | 12379.8 |
|                                                                            | AGE              | 1.007        | 1.003                 | 1.012                 | 0.0005  |         |
|                                                                            | Female vs. Male  | 1.103        | 0.966                 | 1.260                 | 0.1466  |         |
|                                                                            | SOFA             | 0.855        | 0.775                 | 0.944                 | 0.0018  |         |
|                                                                            | INR              | 0.987        | 0.920                 | 1.059                 | 0.7195  |         |
|                                                                            | HAEMOGLOBIN      | 1.005        | 1.001                 | 1.008                 | 0.0088  |         |
|                                                                            | WHITE_CELL_COUNT | 1.002        | 0.999                 | 1.005                 | 0.1311  |         |
|                                                                            | ALBUMIN          | 1.006        | 0.996                 | 1.015                 | 0.2435  |         |
|                                                                            | Trt: High vs. Lo | 0.953        | 0.841                 | 1.080                 | 0.4532  |         |

| Model Variables                                                     | Predictor        | Hazard Ratio | HR 95% CI<br>Lower Bound | HR 95% CI<br>Upper Bound | p-value | AIC     |
|---------------------------------------------------------------------|------------------|--------------|--------------------------|--------------------------|---------|---------|
| PCT_CHG_40 AGE SOFA INR HAEMOGLOBIN<br>WHITE_CELL_COUNT ALBUMIN TRT | PCT_CHG_40       | 0.869        | 0.759                    | 0.996                    | 0.0437  | 12379.9 |
|                                                                     | AGE              | 1.007        | 1.003                    | 1.012                    | 0.0007  |         |
|                                                                     | SOFA             | 0.856        | 0.776                    | 0.944                    | 0.0019  |         |
|                                                                     | INR              | 0.992        | 0.925                    | 1.065                    | 0.8330  |         |
|                                                                     | HAEMOGLOBIN      | 1.004        | 1.001                    | 1.008                    | 0.0103  |         |
|                                                                     | WHITE_CELL_COUNT | 1.002        | 0.999                    | 1.005                    | 0.1431  |         |
|                                                                     | ALBUMIN          | 1.005        | 0.996                    | 1.015                    | 0.2675  |         |
|                                                                     | Trt: High vs. Lo | 0.956        | 0.844                    | 1.083                    | 0.4793  |         |
| PCT_CHG_40 AGE SOFA PLAT_COUNT INR<br>HAEMOGLOBIN ALBUMIN           | PCT_CHG_40       | 0.878        | 0.766                    | 1.007                    | 0.0637  | 12380.0 |
|                                                                     | AGE              | 1.007        | 1.003                    | 1.012                    | 0.0006  |         |
|                                                                     | SOFA             | 0.855        | 0.767                    | 0.952                    | 0.0045  |         |
|                                                                     | PLAT_COUNT       | 1.000        | 0.999                    | 1.001                    | 0.9176  |         |
|                                                                     | INR              | 0.994        | 0.927                    | 1.066                    | 0.8713  |         |
|                                                                     | HAEMOGLOBIN      | 1.004        | 1.001                    | 1.008                    | 0.0106  |         |
|                                                                     | ALBUMIN          | 1.005        | 0.996                    | 1.015                    | 0.2611  |         |

| Model Variables                                              | Predictor        | Hazard Ratio | HR 95% CI Lower Bound | HR 95% CI Upper Bound | p-value | AIC     |
|--------------------------------------------------------------|------------------|--------------|-----------------------|-----------------------|---------|---------|
| PCT_CHG_50 AGE SOFA SEPSIS INR HAEMOGLOBIN ALBUMIN           | PCT_CHG_50       | 0.837        | 0.722                 | 0.970                 | 0.0181  | 12376.3 |
|                                                              | AGE              | 1.007        | 1.003                 | 1.011                 | 0.0008  |         |
|                                                              | SOFA             | 0.855        | 0.774                 | 0.943                 | 0.0017  |         |
|                                                              | SEPSIS           | 1.105        | 0.970                 | 1.258                 | 0.1340  |         |
|                                                              | INR              | 0.997        | 0.929                 | 1.070                 | 0.9302  |         |
|                                                              | HAEMOGLOBIN      | 1.004        | 1.001                 | 1.008                 | 0.0125  |         |
|                                                              | ALBUMIN          | 1.007        | 0.998                 | 1.017                 | 0.1439  |         |
| PCT_CHG_50 AGE SOFA INR HAEMOGLOBIN ALBUMIN                  | PCT_CHG_50       | 0.846        | 0.730                 | 0.980                 | 0.0256  | 12376.5 |
|                                                              | AGE              | 1.007        | 1.003                 | 1.012                 | 0.0007  |         |
|                                                              | SOFA             | 0.856        | 0.776                 | 0.945                 | 0.0020  |         |
|                                                              | INR              | 0.998        | 0.930                 | 1.070                 | 0.9529  |         |
|                                                              | HAEMOGLOBIN      | 1.004        | 1.001                 | 1.008                 | 0.0100  |         |
|                                                              | ALBUMIN          | 1.005        | 0.996                 | 1.015                 | 0.2717  |         |
| PCT_CHG_50 AGE SEX SOFA SEPSIS INR HAEMOGLOBIN ALBUMIN       | PCT_CHG_50       | 0.830        | 0.716                 | 0.963                 | 0.0140  | 12376.6 |
|                                                              | AGE              | 1.007        | 1.003                 | 1.012                 | 0.0007  |         |
|                                                              | Female vs. Male  | 1.093        | 0.957                 | 1.247                 | 0.1882  |         |
|                                                              | SOFA             | 0.854        | 0.774                 | 0.942                 | 0.0017  |         |
|                                                              | SEPSIS           | 1.101        | 0.966                 | 1.254                 | 0.1483  |         |
|                                                              | INR              | 0.992        | 0.924                 | 1.065                 | 0.8264  |         |
|                                                              | HAEMOGLOBIN      | 1.004        | 1.001                 | 1.008                 | 0.0111  |         |
|                                                              | ALBUMIN          | 1.007        | 0.998                 | 1.017                 | 0.1347  |         |
| PCT_CHG_50 AGE SEX SOFA INR HAEMOGLOBIN ALBUMIN              | PCT_CHG_50       | 0.839        | 0.723                 | 0.972                 | 0.0196  | 12376.6 |
|                                                              | AGE              | 1.007        | 1.003                 | 1.012                 | 0.0006  |         |
|                                                              | Female vs. Male  | 1.097        | 0.961                 | 1.252                 | 0.1692  |         |
|                                                              | SOFA             | 0.856        | 0.776                 | 0.944                 | 0.0018  |         |
|                                                              | INR              | 0.993        | 0.925                 | 1.065                 | 0.8423  |         |
|                                                              | HAEMOGLOBIN      | 1.004        | 1.001                 | 1.008                 | 0.0089  |         |
|                                                              | ALBUMIN          | 1.005        | 0.996                 | 1.015                 | 0.2497  |         |
| PCT_CHG_50 AGE SOFA INR HAEMOGLOBIN WHITE_CELL_COUNT ALBUMIN | PCT_CHG_50       | 0.839        | 0.723                 | 0.972                 | 0.0197  | 12376.8 |
|                                                              | AGE              | 1.007        | 1.003                 | 1.011                 | 0.0008  |         |
|                                                              | SOFA             | 0.856        | 0.776                 | 0.944                 | 0.0019  |         |
|                                                              | INR              | 0.998        | 0.930                 | 1.070                 | 0.9519  |         |
|                                                              | HAEMOGLOBIN      | 1.004        | 1.001                 | 1.008                 | 0.0106  |         |
|                                                              | WHITE_CELL_COUNT | 1.002        | 0.999                 | 1.005                 | 0.1192  |         |

| Model Variables                                                         | Predictor        | Hazard Ratio | HR 95% CI Lower Bound | HR 95% CI Upper Bound | p-value | AIC     |
|-------------------------------------------------------------------------|------------------|--------------|-----------------------|-----------------------|---------|---------|
| PCT_CHG_50 AGE SOFA INR HAEMOGLOBIN WHITE_CELL_COUNT ALBUMIN            | ALBUMIN          | 1.005        | 0.996                 | 1.015                 | 0.2824  | 12376.8 |
| PCT_CHG_50 AGE SOFA SEPSIS INR HAEMOGLOBIN WHITE_CELL_COUNT ALBUMIN     | PCT_CHG_50       | 0.831        | 0.716                 | 0.964                 | 0.0143  | 12376.8 |
|                                                                         | AGE              | 1.007        | 1.003                 | 1.011                 | 0.0009  |         |
|                                                                         | SOFA             | 0.854        | 0.774                 | 0.943                 | 0.0017  |         |
|                                                                         | SEPSIS           | 1.098        | 0.964                 | 1.251                 | 0.1598  |         |
|                                                                         | INR              | 0.997        | 0.929                 | 1.070                 | 0.9315  |         |
|                                                                         | HAEMOGLOBIN      | 1.004        | 1.001                 | 1.008                 | 0.0131  |         |
|                                                                         | WHITE_CELL_COUNT | 1.002        | 0.999                 | 1.005                 | 0.1581  |         |
|                                                                         | ALBUMIN          | 1.007        | 0.997                 | 1.017                 | 0.1572  |         |
| PCT_CHG_50 AGE SEX SOFA INR HAEMOGLOBIN WHITE_CELL_COUNT ALBUMIN        | PCT_CHG_50       | 0.832        | 0.717                 | 0.965                 | 0.0148  | 12376.8 |
|                                                                         | AGE              | 1.007        | 1.003                 | 1.012                 | 0.0007  |         |
|                                                                         | Female vs. Male  | 1.099        | 0.963                 | 1.255                 | 0.1604  |         |
|                                                                         | SOFA             | 0.855        | 0.775                 | 0.943                 | 0.0018  |         |
|                                                                         | INR              | 0.993        | 0.925                 | 1.065                 | 0.8388  |         |
|                                                                         | HAEMOGLOBIN      | 1.004        | 1.001                 | 1.008                 | 0.0096  |         |
|                                                                         | WHITE_CELL_COUNT | 1.002        | 1.000                 | 1.005                 | 0.1097  |         |
|                                                                         | ALBUMIN          | 1.005        | 0.996                 | 1.015                 | 0.2594  |         |
| PCT_CHG_50 AGE SEX SOFA SEPSIS INR HAEMOGLOBIN WHITE_CELL_COUNT ALBUMIN | PCT_CHG_50       | 0.824        | 0.710                 | 0.957                 | 0.0109  | 12377.0 |
|                                                                         | AGE              | 1.007        | 1.003                 | 1.012                 | 0.0008  |         |
|                                                                         | Female vs. Male  | 1.095        | 0.959                 | 1.250                 | 0.1783  |         |
|                                                                         | SOFA             | 0.854        | 0.774                 | 0.942                 | 0.0016  |         |
|                                                                         | SEPSIS           | 1.094        | 0.960                 | 1.247                 | 0.1774  |         |
|                                                                         | INR              | 0.992        | 0.924                 | 1.065                 | 0.8251  |         |
|                                                                         | HAEMOGLOBIN      | 1.004        | 1.001                 | 1.008                 | 0.0116  |         |
|                                                                         | WHITE_CELL_COUNT | 1.002        | 0.999                 | 1.005                 | 0.1456  |         |
|                                                                         | ALBUMIN          | 1.007        | 0.997                 | 1.017                 | 0.1474  |         |
| PCT_CHG_50 AGE SOFA SEPSIS INR HAEMOGLOBIN ALBUMIN TRT                  | PCT_CHG_50       | 0.837        | 0.722                 | 0.970                 | 0.0180  | 12377.9 |
|                                                                         | AGE              | 1.007        | 1.003                 | 1.011                 | 0.0009  |         |
|                                                                         | SOFA             | 0.854        | 0.774                 | 0.942                 | 0.0017  |         |
|                                                                         | SEPSIS           | 1.104        | 0.970                 | 1.258                 | 0.1352  |         |
|                                                                         | INR              | 0.995        | 0.927                 | 1.068                 | 0.8944  |         |
|                                                                         | HAEMOGLOBIN      | 1.004        | 1.001                 | 1.008                 | 0.0117  |         |
|                                                                         | ALBUMIN          | 1.007        | 0.998                 | 1.017                 | 0.1427  |         |

| Model Variables                                               | Predictor        | Hazard Ratio | HR 95% CI Lower Bound | HR 95% CI Upper Bound | p-value | AIC     |
|---------------------------------------------------------------|------------------|--------------|-----------------------|-----------------------|---------|---------|
| PCT_CHG_50 AGE SOFA SEPSIS INR HAEMOGLOBIN ALBUMIN TRT        | Trt: High vs. Lo | 0.963        | 0.850                 | 1.091                 | 0.5527  | 12377.9 |
| PCT_CHG_50 AGE SOFA INR HAEMOGLOBIN ALBUMIN TRT               | PCT_CHG_50       | 0.845        | 0.730                 | 0.980                 | 0.0255  | 12378.2 |
|                                                               | AGE              | 1.007        | 1.003                 | 1.012                 | 0.0007  |         |
|                                                               | SOFA             | 0.856        | 0.776                 | 0.944                 | 0.0019  |         |
|                                                               | INR              | 0.996        | 0.929                 | 1.069                 | 0.9169  |         |
|                                                               | HAEMOGLOBIN      | 1.004        | 1.001                 | 1.008                 | 0.0093  |         |
|                                                               | ALBUMIN          | 1.005        | 0.996                 | 1.015                 | 0.2693  |         |
|                                                               | Trt: High vs. Lo | 0.962        | 0.850                 | 1.090                 | 0.5449  |         |
| PCT_CHG_50 AGE SEX SOFA SEPSIS INR HAEMOGLOBIN ALBUMIN TRT    | PCT_CHG_50       | 0.830        | 0.716                 | 0.963                 | 0.0139  | 12378.2 |
|                                                               | AGE              | 1.007        | 1.003                 | 1.012                 | 0.0007  |         |
|                                                               | Female vs. Male  | 1.094        | 0.958                 | 1.249                 | 0.1832  |         |
|                                                               | SOFA             | 0.853        | 0.773                 | 0.942                 | 0.0016  |         |
|                                                               | SEPSIS           | 1.100        | 0.966                 | 1.254                 | 0.1494  |         |
|                                                               | INR              | 0.990        | 0.922                 | 1.063                 | 0.7895  |         |
|                                                               | HAEMOGLOBIN      | 1.004        | 1.001                 | 1.008                 | 0.0103  |         |
|                                                               | ALBUMIN          | 1.007        | 0.998                 | 1.017                 | 0.1330  |         |
|                                                               | Trt: High vs. Lo | 0.961        | 0.848                 | 1.088                 | 0.5312  |         |
| PCT_CHG_50 AGE SOFA PLAT_COUNT SEPSIS INR HAEMOGLOBIN ALBUMIN | PCT_CHG_50       | 0.838        | 0.722                 | 0.973                 | 0.0204  | 12378.2 |
|                                                               | AGE              | 1.007        | 1.003                 | 1.012                 | 0.0008  |         |
|                                                               | SOFA             | 0.850        | 0.762                 | 0.948                 | 0.0036  |         |
|                                                               | PLAT_COUNT       | 1.000        | 0.999                 | 1.000                 | 0.8393  |         |
|                                                               | SEPSIS           | 1.106        | 0.970                 | 1.260                 | 0.1313  |         |
|                                                               | INR              | 0.997        | 0.929                 | 1.069                 | 0.9253  |         |
|                                                               | HAEMOGLOBIN      | 1.004        | 1.001                 | 1.008                 | 0.0124  |         |
|                                                               | ALBUMIN          | 1.007        | 0.998                 | 1.017                 | 0.1441  |         |
| PCT_CHG_50 AGE SEX SOFA INR HAEMOGLOBIN ALBUMIN TRT           | PCT_CHG_50       | 0.838        | 0.723                 | 0.972                 | 0.0194  | 12378.2 |
|                                                               | AGE              | 1.007        | 1.003                 | 1.012                 | 0.0006  |         |
|                                                               | Female vs. Male  | 1.098        | 0.962                 | 1.253                 | 0.1651  |         |
|                                                               | SOFA             | 0.855        | 0.775                 | 0.943                 | 0.0018  |         |
|                                                               | INR              | 0.991        | 0.923                 | 1.064                 | 0.8054  |         |
|                                                               | HAEMOGLOBIN      | 1.005        | 1.001                 | 1.008                 | 0.0083  |         |
|                                                               | ALBUMIN          | 1.006        | 0.996                 | 1.015                 | 0.2465  |         |
|                                                               | Trt: High vs. Lo | 0.960        | 0.848                 | 1.088                 | 0.5252  |         |

| Model Variables                                                           | Predictor        | Hazard Ratio | HR 95% CI Lower Bound | HR 95% CI Upper Bound | p-value | AIC     |
|---------------------------------------------------------------------------|------------------|--------------|-----------------------|-----------------------|---------|---------|
| PCT_CHG_60 AGE SOFA SEPSIS INR<br>HAEMOGLOBIN ALBUMIN                     | PCT_CHG_60       | 0.777        | 0.652                 | 0.927                 | 0.0050  | 12373.7 |
|                                                                           | AGE              | 1.007        | 1.003                 | 1.011                 | 0.0008  |         |
|                                                                           | SOFA             | 0.853        | 0.773                 | 0.941                 | 0.0015  |         |
|                                                                           | SEPSIS           | 1.111        | 0.976                 | 1.266                 | 0.1120  |         |
|                                                                           | INR              | 0.993        | 0.926                 | 1.064                 | 0.8337  |         |
|                                                                           | HAEMOGLOBIN      | 1.004        | 1.001                 | 1.008                 | 0.0107  |         |
|                                                                           | ALBUMIN          | 1.006        | 0.997                 | 1.016                 | 0.1963  |         |
| PCT_CHG_60 AGE SEX SOFA SEPSIS INR<br>HAEMOGLOBIN ALBUMIN                 | PCT_CHG_60       | 0.772        | 0.647                 | 0.920                 | 0.0039  | 12374.0 |
|                                                                           | AGE              | 1.007        | 1.003                 | 1.012                 | 0.0007  |         |
|                                                                           | Female vs. Male  | 1.093        | 0.958                 | 1.247                 | 0.1877  |         |
|                                                                           | SOFA             | 0.852        | 0.772                 | 0.940                 | 0.0013  |         |
|                                                                           | SEPSIS           | 1.108        | 0.972                 | 1.262                 | 0.1243  |         |
|                                                                           | INR              | 0.987        | 0.920                 | 1.059                 | 0.7212  |         |
|                                                                           | HAEMOGLOBIN      | 1.004        | 1.001                 | 1.008                 | 0.0095  |         |
|                                                                           | ALBUMIN          | 1.007        | 0.997                 | 1.016                 | 0.1873  |         |
| PCT_CHG_60 AGE SOFA SEPSIS INR<br>HAEMOGLOBIN WHITE_CELL_COUNT<br>ALBUMIN | PCT_CHG_60       | 0.771        | 0.646                 | 0.920                 | 0.0039  | 12374.2 |
|                                                                           | AGE              | 1.007        | 1.003                 | 1.011                 | 0.0009  |         |
|                                                                           | SOFA             | 0.852        | 0.773                 | 0.940                 | 0.0014  |         |
|                                                                           | SEPSIS           | 1.105        | 0.969                 | 1.259                 | 0.1351  |         |
|                                                                           | INR              | 0.992        | 0.925                 | 1.064                 | 0.8274  |         |
|                                                                           | HAEMOGLOBIN      | 1.004        | 1.001                 | 1.008                 | 0.0113  |         |
|                                                                           | WHITE_CELL_COUNT | 1.002        | 0.999                 | 1.005                 | 0.1521  |         |
|                                                                           | ALBUMIN          | 1.006        | 0.996                 | 1.016                 | 0.2145  |         |
| PCT_CHG_60 AGE SOFA INR HAEMOGLOBIN<br>ALBUMIN                            | PCT_CHG_60       | 0.789        | 0.663                 | 0.940                 | 0.0080  | 12374.2 |
|                                                                           | AGE              | 1.007        | 1.003                 | 1.012                 | 0.0007  |         |
|                                                                           | SOFA             | 0.855        | 0.775                 | 0.943                 | 0.0017  |         |
|                                                                           | INR              | 0.994        | 0.927                 | 1.066                 | 0.8624  |         |
|                                                                           | HAEMOGLOBIN      | 1.004        | 1.001                 | 1.008                 | 0.0085  |         |
|                                                                           | ALBUMIN          | 1.004        | 0.995                 | 1.014                 | 0.3627  |         |
|                                                                           |                  |              |                       |                       |         |         |
| PCT_CHG_60 AGE SEX SOFA INR<br>HAEMOGLOBIN ALBUMIN                        | PCT_CHG_60       | 0.783        | 0.657                 | 0.933                 | 0.0062  | 12374.3 |
|                                                                           | AGE              | 1.007        | 1.003                 | 1.012                 | 0.0006  |         |
|                                                                           | Female vs. Male  | 1.097        | 0.962                 | 1.252                 | 0.1680  |         |
|                                                                           | SOFA             | 0.854        | 0.774                 | 0.941                 | 0.0015  |         |
|                                                                           | INR              | 0.988        | 0.921                 | 1.060                 | 0.7417  |         |
|                                                                           |                  |              |                       |                       |         |         |

| Model Variables                                                               | Predictor        | Hazard Ratio | HR 95% CI<br>Lower Bound | HR 95% CI<br>Upper Bound | p-value | AIC     |
|-------------------------------------------------------------------------------|------------------|--------------|--------------------------|--------------------------|---------|---------|
| PCT_CHG_60 AGE SEX SOFA INR<br>HAEMOGLOBIN ALBUMIN                            | HAEMOGLOBIN      | 1.005        | 1.001                    | 1.008                    | 0.0077  | 12374.3 |
|                                                                               | ALBUMIN          | 1.005        | 0.995                    | 1.014                    | 0.3404  |         |
| PCT_CHG_60 AGE SEX SOFA SEPSIS INR<br>HAEMOGLOBIN WHITE_CELL_COUNT<br>ALBUMIN | PCT_CHG_60       | 0.765        | 0.641                    | 0.913                    | 0.0030  | 12374.4 |
|                                                                               | AGE              | 1.007        | 1.003                    | 1.012                    | 0.0008  |         |
|                                                                               | Female vs. Male  | 1.095        | 0.959                    | 1.250                    | 0.1780  |         |
|                                                                               | SOFA             | 0.852        | 0.772                    | 0.939                    | 0.0013  |         |
|                                                                               | SEPSIS           | 1.101        | 0.966                    | 1.254                    | 0.1503  |         |
|                                                                               | INR              | 0.987        | 0.920                    | 1.059                    | 0.7123  |         |
|                                                                               | HAEMOGLOBIN      | 1.004        | 1.001                    | 1.008                    | 0.0101  |         |
|                                                                               | WHITE_CELL_COUNT | 1.002        | 0.999                    | 1.005                    | 0.1404  |         |
|                                                                               | ALBUMIN          | 1.006        | 0.997                    | 1.016                    | 0.2052  |         |
| PCT_CHG_60 AGE SOFA INR HAEMOGLOBIN<br>WHITE_CELL_COUNT ALBUMIN               | PCT_CHG_60       | 0.782        | 0.656                    | 0.932                    | 0.0060  | 12374.4 |
|                                                                               | AGE              | 1.007        | 1.003                    | 1.011                    | 0.0008  |         |
|                                                                               | SOFA             | 0.854        | 0.774                    | 0.942                    | 0.0016  |         |
|                                                                               | INR              | 0.993        | 0.927                    | 1.065                    | 0.8527  |         |
|                                                                               | HAEMOGLOBIN      | 1.004        | 1.001                    | 1.008                    | 0.0092  |         |
|                                                                               | WHITE_CELL_COUNT | 1.002        | 1.000                    | 1.005                    | 0.1120  |         |
|                                                                               | ALBUMIN          | 1.004        | 0.995                    | 1.014                    | 0.3783  |         |
| PCT_CHG_60 AGE SEX SOFA INR<br>HAEMOGLOBIN WHITE_CELL_COUNT<br>ALBUMIN        | PCT_CHG_60       | 0.775        | 0.650                    | 0.924                    | 0.0046  | 12374.5 |
|                                                                               | AGE              | 1.007        | 1.003                    | 1.012                    | 0.0006  |         |
|                                                                               | Female vs. Male  | 1.100        | 0.963                    | 1.255                    | 0.1594  |         |
|                                                                               | SOFA             | 0.853        | 0.774                    | 0.941                    | 0.0015  |         |
|                                                                               | INR              | 0.988        | 0.921                    | 1.060                    | 0.7296  |         |
|                                                                               | HAEMOGLOBIN      | 1.004        | 1.001                    | 1.008                    | 0.0083  |         |
|                                                                               | WHITE_CELL_COUNT | 1.002        | 1.000                    | 1.005                    | 0.1033  |         |
|                                                                               | ALBUMIN          | 1.004        | 0.995                    | 1.014                    | 0.3552  |         |
| PCT_CHG_60 AGE SOFA SEPSIS INR<br>HAEMOGLOBIN ALBUMIN TRT                     | PCT_CHG_60       | 0.777        | 0.651                    | 0.926                    | 0.0048  | 12375.3 |
|                                                                               | AGE              | 1.007        | 1.003                    | 1.011                    | 0.0009  |         |
|                                                                               | SOFA             | 0.852        | 0.772                    | 0.940                    | 0.0014  |         |
|                                                                               | SEPSIS           | 1.111        | 0.976                    | 1.266                    | 0.1125  |         |
|                                                                               | INR              | 0.991        | 0.924                    | 1.063                    | 0.7952  |         |
|                                                                               | HAEMOGLOBIN      | 1.004        | 1.001                    | 1.008                    | 0.0099  |         |
|                                                                               | ALBUMIN          | 1.006        | 0.997                    | 1.016                    | 0.1955  |         |

| Model Variables                                                  | Predictor        | Hazard Ratio | HR 95% CI<br>Lower Bound | HR 95% CI<br>Upper Bound | p-value | AIC     |
|------------------------------------------------------------------|------------------|--------------|--------------------------|--------------------------|---------|---------|
| PCT_CHG_60 AGE SOFA SEPSIS INR<br>HAEMOGLOBIN ALBUMIN TRT        | Trt: High vs. Lo | 0.960        | 0.848                    | 1.088                    | 0.5243  | 12375.3 |
| PCT_CHG_60 AGE SEX SOFA SEPSIS INR<br>HAEMOGLOBIN ALBUMIN TRT    | PCT_CHG_60       | 0.771        | 0.646                    | 0.919                    | 0.0038  | 12375.5 |
|                                                                  | AGE              | 1.007        | 1.003                    | 1.012                    | 0.0007  |         |
|                                                                  | Female vs. Male  | 1.094        | 0.959                    | 1.249                    | 0.1821  |         |
|                                                                  | SOFA             | 0.851        | 0.772                    | 0.939                    | 0.0013  |         |
|                                                                  | SEPSIS           | 1.108        | 0.972                    | 1.262                    | 0.1246  |         |
|                                                                  | INR              | 0.985        | 0.918                    | 1.057                    | 0.6821  |         |
|                                                                  | HAEMOGLOBIN      | 1.004        | 1.001                    | 1.008                    | 0.0088  |         |
|                                                                  | ALBUMIN          | 1.007        | 0.997                    | 1.016                    | 0.1859  |         |
|                                                                  | Trt: High vs. Lo | 0.958        | 0.846                    | 1.085                    | 0.5023  |         |
| PCT_CHG_60 AGE SOFA PLAT_COUNT<br>SEPSIS INR HAEMOGLOBIN ALBUMIN | PCT_CHG_60       | 0.779        | 0.653                    | 0.929                    | 0.0054  | 12375.6 |
|                                                                  | AGE              | 1.007        | 1.003                    | 1.012                    | 0.0008  |         |
|                                                                  | SOFA             | 0.847        | 0.759                    | 0.944                    | 0.0027  |         |
|                                                                  | PLAT_COUNT       | 1.000        | 0.999                    | 1.000                    | 0.7642  |         |
|                                                                  | SEPSIS           | 1.113        | 0.977                    | 1.268                    | 0.1081  |         |
|                                                                  | INR              | 0.992        | 0.925                    | 1.064                    | 0.8301  |         |
|                                                                  | HAEMOGLOBIN      | 1.004        | 1.001                    | 1.008                    | 0.0105  |         |
|                                                                  | ALBUMIN          | 1.006        | 0.997                    | 1.016                    | 0.1960  |         |



| Model Variables                                                                 | Predictor        | Hazard Ratio | HR 95% CI Lower Bound | HR 95% CI Upper Bound | p-value | AIC     |
|---------------------------------------------------------------------------------|------------------|--------------|-----------------------|-----------------------|---------|---------|
| NADIR_GE100 AGE SOFA PLAT_COUNT SEPSIS INR HAEMOGLOBIN ALBUMIN                  | NADIR_GE100      | 1.293        | 1.098                 | 1.522                 | 0.0021  | 12374.2 |
|                                                                                 | AGE              | 1.007        | 1.002                 | 1.011                 | 0.0021  |         |
|                                                                                 | SOFA             | 0.868        | 0.778                 | 0.969                 | 0.0116  |         |
|                                                                                 | PLAT_COUNT       | 0.999        | 0.999                 | 1.000                 | 0.0428  |         |
|                                                                                 | SEPSIS           | 1.111        | 0.975                 | 1.265                 | 0.1147  |         |
|                                                                                 | INR              | 0.991        | 0.925                 | 1.062                 | 0.7988  |         |
|                                                                                 | HAEMOGLOBIN      | 1.004        | 1.001                 | 1.007                 | 0.0196  |         |
|                                                                                 | ALBUMIN          | 1.008        | 0.998                 | 1.017                 | 0.1183  |         |
| NADIR_GE100 AGE SEX SOFA PLAT_COUNT SEPSIS INR HAEMOGLOBIN ALBUMIN              | NADIR_GE100      | 1.298        | 1.102                 | 1.528                 | 0.0017  | 12374.6 |
|                                                                                 | AGE              | 1.007        | 1.003                 | 1.011                 | 0.0019  |         |
|                                                                                 | Female vs. Male  | 1.088        | 0.954                 | 1.242                 | 0.2084  |         |
|                                                                                 | SOFA             | 0.867        | 0.777                 | 0.968                 | 0.0112  |         |
|                                                                                 | PLAT_COUNT       | 0.999        | 0.999                 | 1.000                 | 0.0404  |         |
|                                                                                 | SEPSIS           | 1.107        | 0.972                 | 1.261                 | 0.1271  |         |
|                                                                                 | INR              | 0.986        | 0.920                 | 1.057                 | 0.6912  |         |
|                                                                                 | HAEMOGLOBIN      | 1.004        | 1.001                 | 1.007                 | 0.0184  |         |
|                                                                                 | ALBUMIN          | 1.008        | 0.998                 | 1.018                 | 0.1091  |         |
| NADIR_GE100 AGE SOFA PLAT_COUNT INR HAEMOGLOBIN ALBUMIN                         | NADIR_GE100      | 1.277        | 1.086                 | 1.502                 | 0.0031  | 12374.7 |
|                                                                                 | AGE              | 1.007        | 1.003                 | 1.011                 | 0.0018  |         |
|                                                                                 | SOFA             | 0.872        | 0.782                 | 0.972                 | 0.0135  |         |
|                                                                                 | PLAT_COUNT       | 0.999        | 0.999                 | 1.000                 | 0.0622  |         |
|                                                                                 | INR              | 0.993        | 0.926                 | 1.063                 | 0.8311  |         |
|                                                                                 | HAEMOGLOBIN      | 1.004        | 1.001                 | 1.007                 | 0.0153  |         |
|                                                                                 | ALBUMIN          | 1.006        | 0.996                 | 1.015                 | 0.2375  |         |
| NADIR_GE100 AGE SOFA PLAT_COUNT SEPSIS INR HAEMOGLOBIN WHITE_CELL_COUNT ALBUMIN | NADIR_GE100      | 1.295        | 1.100                 | 1.525                 | 0.0019  | 12374.9 |
|                                                                                 | AGE              | 1.007        | 1.002                 | 1.011                 | 0.0022  |         |
|                                                                                 | SOFA             | 0.865        | 0.775                 | 0.966                 | 0.0102  |         |
|                                                                                 | PLAT_COUNT       | 0.999        | 0.999                 | 1.000                 | 0.0333  |         |
|                                                                                 | SEPSIS           | 1.104        | 0.969                 | 1.259                 | 0.1362  |         |
|                                                                                 | INR              | 0.991        | 0.924                 | 1.062                 | 0.7885  |         |
|                                                                                 | HAEMOGLOBIN      | 1.004        | 1.001                 | 1.007                 | 0.0207  |         |
|                                                                                 | WHITE_CELL_COUNT | 1.002        | 0.999                 | 1.004                 | 0.1818  |         |
|                                                                                 | ALBUMIN          | 1.008        | 0.998                 | 1.017                 | 0.1282  |         |

| Model Variables                                                                     | Predictor        | Hazard Ratio | HR 95% CI Lower Bound | HR 95% CI Upper Bound | p-value | AIC     |
|-------------------------------------------------------------------------------------|------------------|--------------|-----------------------|-----------------------|---------|---------|
| NADIR_GE100 AGE SEX SOFA PLAT_COUNT INR HAEMOGLOBIN ALBUMIN                         | NADIR_GE100      | 1.283        | 1.091                 | 1.509                 | 0.0026  | 12375.0 |
|                                                                                     | AGE              | 1.007        | 1.003                 | 1.011                 | 0.0016  |         |
|                                                                                     | Female vs. Male  | 1.093        | 0.958                 | 1.247                 | 0.1865  |         |
|                                                                                     | SOFA             | 0.871        | 0.781                 | 0.971                 | 0.0128  |         |
|                                                                                     | PLAT_COUNT       | 0.999        | 0.999                 | 1.000                 | 0.0578  |         |
|                                                                                     | INR              | 0.987        | 0.921                 | 1.058                 | 0.7142  |         |
|                                                                                     | HAEMOGLOBIN      | 1.004        | 1.001                 | 1.007                 | 0.0147  |         |
|                                                                                     | ALBUMIN          | 1.006        | 0.997                 | 1.015                 | 0.2151  |         |
| NADIR_GE100 AGE SOFA PLAT_COUNT INR HAEMOGLOBIN WHITE_CELL_COUNT ALBUMIN            | NADIR_GE100      | 1.281        | 1.089                 | 1.507                 | 0.0028  | 12375.1 |
|                                                                                     | AGE              | 1.007        | 1.002                 | 1.011                 | 0.0019  |         |
|                                                                                     | SOFA             | 0.869        | 0.779                 | 0.969                 | 0.0116  |         |
|                                                                                     | PLAT_COUNT       | 0.999        | 0.999                 | 1.000                 | 0.0470  |         |
|                                                                                     | INR              | 0.992        | 0.926                 | 1.063                 | 0.8170  |         |
|                                                                                     | HAEMOGLOBIN      | 1.004        | 1.001                 | 1.007                 | 0.0165  |         |
|                                                                                     | WHITE_CELL_COUNT | 1.002        | 0.999                 | 1.005                 | 0.1403  |         |
|                                                                                     | ALBUMIN          | 1.006        | 0.996                 | 1.015                 | 0.2454  |         |
| NADIR_GE100 AGE SEX SOFA PLAT_COUNT SEPSIS INR HAEMOGLOBIN WHITE_CELL_COUNT ALBUMIN | NADIR_GE100      | 1.300        | 1.105                 | 1.531                 | 0.0016  | 12375.3 |
|                                                                                     | AGE              | 1.007        | 1.002                 | 1.011                 | 0.0020  |         |
|                                                                                     | Female vs. Male  | 1.090        | 0.955                 | 1.244                 | 0.2016  |         |
|                                                                                     | SOFA             | 0.865        | 0.775                 | 0.966                 | 0.0098  |         |
|                                                                                     | PLAT_COUNT       | 0.999        | 0.999                 | 1.000                 | 0.0313  |         |
|                                                                                     | SEPSIS           | 1.101        | 0.966                 | 1.254                 | 0.1512  |         |
|                                                                                     | INR              | 0.985        | 0.919                 | 1.057                 | 0.6795  |         |
|                                                                                     | HAEMOGLOBIN      | 1.004        | 1.001                 | 1.007                 | 0.0195  |         |
|                                                                                     | WHITE_CELL_COUNT | 1.002        | 0.999                 | 1.004                 | 0.1727  |         |
|                                                                                     | ALBUMIN          | 1.008        | 0.998                 | 1.017                 | 0.1185  |         |
| NADIR_GE100 AGE SEX SOFA PLAT_COUNT INR HAEMOGLOBIN WHITE_CELL_COUNT ALBUMIN        | NADIR_GE100      | 1.287        | 1.094                 | 1.513                 | 0.0023  | 12375.3 |
|                                                                                     | AGE              | 1.007        | 1.003                 | 1.011                 | 0.0017  |         |
|                                                                                     | Female vs. Male  | 1.094        | 0.959                 | 1.249                 | 0.1805  |         |
|                                                                                     | SOFA             | 0.868        | 0.778                 | 0.968                 | 0.0110  |         |
|                                                                                     | PLAT_COUNT       | 0.999        | 0.999                 | 1.000                 | 0.0435  |         |
|                                                                                     | INR              | 0.986        | 0.920                 | 1.057                 | 0.6991  |         |
|                                                                                     | HAEMOGLOBIN      | 1.004        | 1.001                 | 1.007                 | 0.0159  |         |

| Model Variables                                                                    | Predictor        | Hazard Ratio | HR 95% CI Lower Bound | HR 95% CI Upper Bound | p-value | AIC     |
|------------------------------------------------------------------------------------|------------------|--------------|-----------------------|-----------------------|---------|---------|
| NADIR_GE100 AGE SEX SOFA PLAT_COUNT<br>INR HAEMOGLOBIN WHITE_CELL_COUNT<br>ALBUMIN | WHITE_CELL_COUNT | 1.002        | 0.999                 | 1.005                 | 0.1336  | 12375.3 |
|                                                                                    | ALBUMIN          | 1.006        | 0.997                 | 1.015                 | 0.2222  |         |
| NADIR_GE100 AGE SOFA PLAT_COUNT<br>SEPSIS INR HAEMOGLOBIN ALBUMIN TRT              | NADIR_GE100      | 1.301        | 1.105                 | 1.533                 | 0.0016  | 12375.4 |
|                                                                                    | AGE              | 1.007        | 1.002                 | 1.011                 | 0.0023  |         |
|                                                                                    | SOFA             | 0.867        | 0.777                 | 0.968                 | 0.0114  |         |
|                                                                                    | PLAT_COUNT       | 0.999        | 0.999                 | 1.000                 | 0.0382  |         |
|                                                                                    | SEPSIS           | 1.110        | 0.975                 | 1.265                 | 0.1152  |         |
|                                                                                    | INR              | 0.989        | 0.923                 | 1.060                 | 0.7502  |         |
|                                                                                    | HAEMOGLOBIN      | 1.004        | 1.001                 | 1.007                 | 0.0175  |         |
|                                                                                    | ALBUMIN          | 1.008        | 0.998                 | 1.017                 | 0.1177  |         |
|                                                                                    | Trt: High vs. Lo | 0.946        | 0.834                 | 1.072                 | 0.3807  |         |
| NADIR_GE100 AGE SEX SOFA PLAT_COUNT<br>SEPSIS INR HAEMOGLOBIN ALBUMIN TRT          | NADIR_GE100      | 1.307        | 1.109                 | 1.539                 | 0.0014  | 12375.8 |
|                                                                                    | AGE              | 1.007        | 1.002                 | 1.011                 | 0.0021  |         |
|                                                                                    | Female vs. Male  | 1.090        | 0.955                 | 1.244                 | 0.2003  |         |
|                                                                                    | SOFA             | 0.867        | 0.776                 | 0.968                 | 0.0109  |         |
|                                                                                    | PLAT_COUNT       | 0.999        | 0.999                 | 1.000                 | 0.0356  |         |
|                                                                                    | SEPSIS           | 1.107        | 0.971                 | 1.261                 | 0.1273  |         |
|                                                                                    | INR              | 0.984        | 0.917                 | 1.055                 | 0.6425  |         |
|                                                                                    | HAEMOGLOBIN      | 1.004        | 1.001                 | 1.007                 | 0.0164  |         |
|                                                                                    | ALBUMIN          | 1.008        | 0.998                 | 1.018                 | 0.1079  |         |
|                                                                                    | Trt: High vs. Lo | 0.944        | 0.833                 | 1.069                 | 0.3636  |         |
| NADIR_GE100 AGE SOFA PLAT_COUNT INR<br>HAEMOGLOBIN ALBUMIN TRT                     | NADIR_GE100      | 1.286        | 1.093                 | 1.514                 | 0.0025  | 12375.9 |
|                                                                                    | AGE              | 1.007        | 1.002                 | 1.011                 | 0.0020  |         |
|                                                                                    | SOFA             | 0.871        | 0.781                 | 0.972                 | 0.0133  |         |
|                                                                                    | PLAT_COUNT       | 0.999        | 0.999                 | 1.000                 | 0.0556  |         |
|                                                                                    | INR              | 0.990        | 0.924                 | 1.061                 | 0.7826  |         |
|                                                                                    | HAEMOGLOBIN      | 1.004        | 1.001                 | 1.007                 | 0.0136  |         |
|                                                                                    | ALBUMIN          | 1.006        | 0.996                 | 1.015                 | 0.2363  |         |
|                                                                                    | Trt: High vs. Lo | 0.945        | 0.834                 | 1.071                 | 0.3790  |         |
| NADIR_GE100 AGE SEX SOFA PLAT_COUNT<br>INR HAEMOGLOBIN ALBUMIN TRT                 | NADIR_GE100      | 1.292        | 1.098                 | 1.521                 | 0.0021  | 12376.1 |
|                                                                                    | AGE              | 1.007        | 1.003                 | 1.011                 | 0.0018  |         |
|                                                                                    | Female vs. Male  | 1.095        | 0.959                 | 1.249                 | 0.1798  |         |
|                                                                                    | SOFA             | 0.870        | 0.780                 | 0.971                 | 0.0126  |         |
|                                                                                    | PLAT_COUNT       | 0.999        | 0.999                 | 1.000                 | 0.0511  |         |

| Model Variables                                                                           | Predictor        | Hazard Ratio | HR 95% CI<br>Lower Bound | HR 95% CI<br>Upper Bound | p-value | AIC     |
|-------------------------------------------------------------------------------------------|------------------|--------------|--------------------------|--------------------------|---------|---------|
| NADIR_GE100 AGE SEX SOFA PLAT_COUNT<br>INR HAEMOGLOBIN ALBUMIN TRT                        | INR              | 0.985        | 0.919                    | 1.056                    | 0.6659  | 12376.1 |
|                                                                                           | HAEMOGLOBIN      | 1.004        | 1.001                    | 1.008                    | 0.0130  |         |
|                                                                                           | ALBUMIN          | 1.006        | 0.997                    | 1.015                    | 0.2131  |         |
|                                                                                           | Trt: High vs. Lo | 0.944        | 0.833                    | 1.069                    | 0.3631  |         |
| NADIR_GE100 AGE SOFA PLAT_COUNT<br>SEPSIS INR HAEMOGLOBIN<br>WHITE_CELL_COUNT ALBUMIN TRT | NADIR_GE100      | 1.304        | 1.107                    | 1.536                    | 0.0015  | 12376.1 |
|                                                                                           | AGE              | 1.007        | 1.002                    | 1.011                    | 0.0025  |         |
|                                                                                           | SOFA             | 0.865        | 0.775                    | 0.966                    | 0.0100  |         |
|                                                                                           | PLAT_COUNT       | 0.999        | 0.999                    | 1.000                    | 0.0297  |         |
|                                                                                           | SEPSIS           | 1.104        | 0.969                    | 1.259                    | 0.1364  |         |
|                                                                                           | INR              | 0.988        | 0.922                    | 1.059                    | 0.7405  |         |
|                                                                                           | HAEMOGLOBIN      | 1.004        | 1.001                    | 1.007                    | 0.0185  |         |
|                                                                                           | WHITE_CELL_COUNT | 1.002        | 0.999                    | 1.004                    | 0.1849  |         |
|                                                                                           | ALBUMIN          | 1.008        | 0.998                    | 1.017                    | 0.1276  |         |
|                                                                                           | Trt: High vs. Lo | 0.946        | 0.835                    | 1.072                    | 0.3861  |         |
