# Supplementary material
Source: publisher figshare collection journal article supplement (https://karger.figshare.com/articles/dataset/_/16616062)
Supplement: Supplementary file 2 [file 1]

| Model Variables                                                                | Predictor        | Odds Ratio | OR 95% CI Lower Bound | OR 95% CI Upper Bound | p-value | AIC     |
|--------------------------------------------------------------------------------|------------------|------------|-----------------------|-----------------------|---------|---------|
| PCT_CHG_30 AGE SOFA PLAT_COUNT SEPSIS INR HAEMOGLOBIN ALBUMIN                  | PCT_CHG_30       | 1.493      | 1.148                 | 1.941                 | 0.0028  | 1440.95 |
|                                                                                | AGE              | 1.024      | 1.015                 | 1.034                 | <.0001  |         |
|                                                                                | SOFA             | 1.428      | 1.133                 | 1.801                 | 0.0026  |         |
|                                                                                | PLAT_COUNT       | 0.998      | 0.997                 | 0.999                 | 0.0003  |         |
|                                                                                | SEPSIS           | 1.402      | 1.079                 | 1.823                 | 0.0116  |         |
|                                                                                | INR              | 1.141      | 1.005                 | 1.297                 | 0.0425  |         |
|                                                                                | HAEMOGLOBIN      | 0.993      | 0.987                 | 1.000                 | 0.0589  |         |
|                                                                                | ALBUMIN          | 0.969      | 0.951                 | 0.988                 | 0.0015  |         |
| PCT_CHG_30 AGE SOFA PLAT_COUNT SEPSIS INR HAEMOGLOBIN ALBUMIN TRT              | PCT_CHG_30       | 1.503      | 1.155                 | 1.955                 | 0.0025  | 1441.51 |
|                                                                                | AGE              | 1.024      | 1.015                 | 1.034                 | <.0001  |         |
|                                                                                | SOFA             | 1.430      | 1.134                 | 1.803                 | 0.0026  |         |
|                                                                                | PLAT_COUNT       | 0.998      | 0.996                 | 0.999                 | 0.0002  |         |
|                                                                                | SEPSIS           | 1.395      | 1.073                 | 1.814                 | 0.0130  |         |
|                                                                                | INR              | 1.143      | 1.006                 | 1.299                 | 0.0411  |         |
|                                                                                | HAEMOGLOBIN      | 0.993      | 0.987                 | 1.000                 | 0.0601  |         |
|                                                                                | ALBUMIN          | 0.969      | 0.951                 | 0.988                 | 0.0014  |         |
|                                                                                | Trt: High vs. Lo | 1.167      | 0.907                 | 1.501                 | 0.2307  |         |
| PCT_CHG_30 AGE SOFA PLAT_COUNT SEPSIS INR HAEMOGLOBIN WHITE_CELL_COUNT ALBUMIN | PCT_CHG_30       | 1.479      | 1.137                 | 1.925                 | 0.0036  | 1442.18 |
|                                                                                | AGE              | 1.024      | 1.015                 | 1.034                 | <.0001  |         |
|                                                                                | SOFA             | 1.426      | 1.131                 | 1.798                 | 0.0027  |         |
|                                                                                | PLAT_COUNT       | 0.998      | 0.996                 | 0.999                 | 0.0002  |         |
|                                                                                | SEPSIS           | 1.389      | 1.068                 | 1.807                 | 0.0145  |         |
|                                                                                | INR              | 1.143      | 1.006                 | 1.299                 | 0.0404  |         |
|                                                                                | HAEMOGLOBIN      | 0.993      | 0.987                 | 1.000                 | 0.0609  |         |
|                                                                                | WHITE_CELL_COUNT | 1.002      | 0.997                 | 1.008                 | 0.4230  |         |
|                                                                                | ALBUMIN          | 0.969      | 0.951                 | 0.988                 | 0.0013  |         |
| PCT_CHG_30 AGE SOFA PLAT_COUNT SEPSIS INR ALBUMIN                              | PCT_CHG_30       | 1.450      | 1.117                 | 1.881                 | 0.0054  | 1442.60 |
|                                                                                | AGE              | 1.024      | 1.015                 | 1.034                 | <.0001  |         |
|                                                                                | SOFA             | 1.421      | 1.129                 | 1.790                 | 0.0029  |         |
|                                                                                | PLAT_COUNT       | 0.998      | 0.996                 | 0.999                 | 0.0002  |         |
|                                                                                | SEPSIS           | 1.378      | 1.062                 | 1.789                 | 0.0162  |         |
|                                                                                | INR              | 1.132      | 0.998                 | 1.285                 | 0.0546  |         |
|                                                                                | ALBUMIN          | 0.967      | 0.949                 | 0.985                 | 0.0005  |         |

| Model Variables                                                                          | Predictor        | Odds Ratio | OR 95% CI<br>Lower Bound | OR 95% CI<br>Upper Bound | p-value | AIC     |
|------------------------------------------------------------------------------------------|------------------|------------|--------------------------|--------------------------|---------|---------|
| PCT_CHG_30 AGE SEX SOFA PLAT_COUNT<br>SEPSIS INR HAEMOGLOBIN ALBUMIN                     | PCT_CHG_30       | 1.498      | 1.152                    | 1.949                    | 0.0026  | 1442.67 |
|                                                                                          | AGE              | 1.024      | 1.015                    | 1.034                    | <.0001  |         |
|                                                                                          | Female vs. Male  | 0.930      | 0.713                    | 1.215                    | 0.5962  |         |
|                                                                                          | SOFA             | 1.430      | 1.134                    | 1.803                    | 0.0025  |         |
|                                                                                          | PLAT_COUNT       | 0.998      | 0.997                    | 0.999                    | 0.0003  |         |
|                                                                                          | SEPSIS           | 1.403      | 1.080                    | 1.824                    | 0.0114  |         |
|                                                                                          | INR              | 1.143      | 1.006                    | 1.299                    | 0.0401  |         |
|                                                                                          | HAEMOGLOBIN      | 0.993      | 0.986                    | 1.000                    | 0.0577  |         |
|                                                                                          | ALBUMIN          | 0.969      | 0.951                    | 0.988                    | 0.0014  |         |
| PCT_CHG_30 AGE SOFA PLAT_COUNT<br>SEPSIS INR HAEMOGLOBIN<br>WHITE_CELL_COUNT ALBUMIN TRT | PCT_CHG_30       | 1.489      | 1.143                    | 1.938                    | 0.0032  | 1442.71 |
|                                                                                          | AGE              | 1.024      | 1.015                    | 1.034                    | <.0001  |         |
|                                                                                          | SOFA             | 1.427      | 1.132                    | 1.800                    | 0.0027  |         |
|                                                                                          | PLAT_COUNT       | 0.998      | 0.996                    | 0.999                    | 0.0002  |         |
|                                                                                          | SEPSIS           | 1.382      | 1.062                    | 1.798                    | 0.0163  |         |
|                                                                                          | INR              | 1.145      | 1.007                    | 1.302                    | 0.0391  |         |
|                                                                                          | HAEMOGLOBIN      | 0.993      | 0.987                    | 1.000                    | 0.0621  |         |
|                                                                                          | WHITE_CELL_COUNT | 1.002      | 0.997                    | 1.008                    | 0.4135  |         |
|                                                                                          | ALBUMIN          | 0.969      | 0.951                    | 0.988                    | 0.0013  |         |
|                                                                                          | Trt: High vs. Lo | 1.169      | 0.908                    | 1.504                    | 0.2259  |         |

| Model Variables                                                                      | Predictor        | Odds Ratio | OR 95% CI<br>Lower Bound | OR 95% CI<br>Upper Bound | p-value | AIC     |
|--------------------------------------------------------------------------------------|------------------|------------|--------------------------|--------------------------|---------|---------|
| PCT_CHG_40 AGE SOFA PLAT_COUNT<br>SEPSIS INR HAEMOGLOBIN ALBUMIN                     | PCT_CHG_40       | 1.748      | 1.340                    | 2.280                    | <.0001  | 1432.99 |
|                                                                                      | AGE              | 1.024      | 1.015                    | 1.034                    | <.0001  |         |
|                                                                                      | SOFA             | 1.399      | 1.108                    | 1.766                    | 0.0048  |         |
|                                                                                      | PLAT_COUNT       | 0.998      | 0.996                    | 0.999                    | 0.0002  |         |
|                                                                                      | SEPSIS           | 1.380      | 1.060                    | 1.795                    | 0.0167  |         |
|                                                                                      | INR              | 1.137      | 1.001                    | 1.292                    | 0.0492  |         |
|                                                                                      | HAEMOGLOBIN      | 0.993      | 0.986                    | 1.000                    | 0.0436  |         |
|                                                                                      | ALBUMIN          | 0.971      | 0.953                    | 0.990                    | 0.0027  |         |
| PCT_CHG_40 AGE SOFA PLAT_COUNT<br>SEPSIS INR HAEMOGLOBIN ALBUMIN TRT                 | PCT_CHG_40       | 1.756      | 1.345                    | 2.291                    | <.0001  | 1433.56 |
|                                                                                      | AGE              | 1.024      | 1.015                    | 1.034                    | <.0001  |         |
|                                                                                      | SOFA             | 1.400      | 1.109                    | 1.768                    | 0.0048  |         |
|                                                                                      | PLAT_COUNT       | 0.998      | 0.996                    | 0.999                    | 0.0001  |         |
|                                                                                      | SEPSIS           | 1.373      | 1.055                    | 1.787                    | 0.0186  |         |
|                                                                                      | INR              | 1.139      | 1.002                    | 1.296                    | 0.0471  |         |
|                                                                                      | HAEMOGLOBIN      | 0.993      | 0.986                    | 1.000                    | 0.0446  |         |
|                                                                                      | ALBUMIN          | 0.971      | 0.953                    | 0.990                    | 0.0026  |         |
|                                                                                      | Trt: High vs. Lo | 1.166      | 0.906                    | 1.501                    | 0.2338  |         |
| PCT_CHG_40 AGE SOFA PLAT_COUNT<br>SEPSIS INR HAEMOGLOBIN<br>WHITE_CELL_COUNT ALBUMIN | PCT_CHG_40       | 1.733      | 1.327                    | 2.262                    | <.0001  | 1434.38 |
|                                                                                      | AGE              | 1.024      | 1.015                    | 1.034                    | <.0001  |         |
|                                                                                      | SOFA             | 1.397      | 1.107                    | 1.764                    | 0.0050  |         |
|                                                                                      | PLAT_COUNT       | 0.998      | 0.996                    | 0.999                    | 0.0001  |         |
|                                                                                      | SEPSIS           | 1.368      | 1.050                    | 1.782                    | 0.0202  |         |
|                                                                                      | INR              | 1.138      | 1.002                    | 1.294                    | 0.0473  |         |
|                                                                                      | HAEMOGLOBIN      | 0.993      | 0.986                    | 1.000                    | 0.0450  |         |
|                                                                                      | WHITE_CELL_COUNT | 1.002      | 0.997                    | 1.007                    | 0.4724  |         |
|                                                                                      | ALBUMIN          | 0.971      | 0.953                    | 0.990                    | 0.0025  |         |
| PCT_CHG_40 AGE SEX SOFA PLAT_COUNT<br>SEPSIS INR HAEMOGLOBIN ALBUMIN                 | PCT_CHG_40       | 1.762      | 1.349                    | 2.301                    | <.0001  | 1434.47 |
|                                                                                      | AGE              | 1.024      | 1.015                    | 1.033                    | <.0001  |         |
|                                                                                      | Female vs. Male  | 0.906      | 0.693                    | 1.185                    | 0.4726  |         |
|                                                                                      | SOFA             | 1.400      | 1.109                    | 1.768                    | 0.0047  |         |
|                                                                                      | PLAT_COUNT       | 0.998      | 0.996                    | 0.999                    | 0.0002  |         |
|                                                                                      | SEPSIS           | 1.380      | 1.061                    | 1.797                    | 0.0166  |         |
|                                                                                      | INR              | 1.140      | 1.003                    | 1.295                    | 0.0457  |         |
|                                                                                      | HAEMOGLOBIN      | 0.993      | 0.986                    | 1.000                    | 0.0417  |         |

| Model Variables                                                                          | Predictor        | Odds Ratio | OR 95% CI<br>Lower Bound | OR 95% CI<br>Upper Bound | p-value | AIC     |
|------------------------------------------------------------------------------------------|------------------|------------|--------------------------|--------------------------|---------|---------|
| PCT_CHG_40 AGE SEX SOFA PLAT_COUNT<br>SEPSIS INR HAEMOGLOBIN ALBUMIN                     | ALBUMIN          | 0.971      | 0.953                    | 0.990                    | 0.0025  | 1434.47 |
| PCT_CHG_40 AGE SOFA PLAT_COUNT<br>SEPSIS HAEMOGLOBIN ALBUMIN                             | PCT_CHG_40       | 1.805      | 1.386                    | 2.349                    | <.0001  | 1434.85 |
|                                                                                          | AGE              | 1.024      | 1.014                    | 1.033                    | <.0001  |         |
|                                                                                          | SOFA             | 1.412      | 1.119                    | 1.782                    | 0.0037  |         |
|                                                                                          | PLAT_COUNT       | 0.998      | 0.996                    | 0.999                    | 0.0002  |         |
|                                                                                          | SEPSIS           | 1.381      | 1.061                    | 1.796                    | 0.0163  |         |
|                                                                                          | HAEMOGLOBIN      | 0.993      | 0.986                    | 1.000                    | 0.0556  |         |
|                                                                                          | ALBUMIN          | 0.972      | 0.954                    | 0.991                    | 0.0036  |         |
| PCT_CHG_40 AGE SOFA PLAT_COUNT<br>SEPSIS INR HAEMOGLOBIN<br>WHITE_CELL_COUNT ALBUMIN TRT | PCT_CHG_40       | 1.741      | 1.333                    | 2.273                    | <.0001  | 1434.93 |
|                                                                                          | AGE              | 1.024      | 1.015                    | 1.034                    | <.0001  |         |
|                                                                                          | SOFA             | 1.398      | 1.107                    | 1.766                    | 0.0050  |         |
|                                                                                          | PLAT_COUNT       | 0.998      | 0.996                    | 0.999                    | 0.0001  |         |
|                                                                                          | SEPSIS           | 1.361      | 1.045                    | 1.774                    | 0.0226  |         |
|                                                                                          | INR              | 1.141      | 1.003                    | 1.297                    | 0.0452  |         |
|                                                                                          | HAEMOGLOBIN      | 0.993      | 0.986                    | 1.000                    | 0.0461  |         |
|                                                                                          | WHITE_CELL_COUNT | 1.002      | 0.997                    | 1.007                    | 0.4619  |         |
|                                                                                          | ALBUMIN          | 0.971      | 0.952                    | 0.989                    | 0.0024  |         |
|                                                                                          | Trt: High vs. Lo | 1.168      | 0.907                    | 1.504                    | 0.2292  |         |

| Model Variables                                                      | Predictor        | Odds Ratio | OR 95% CI<br>Lower Bound | OR 95% CI<br>Upper Bound | p-value | AIC     |
|----------------------------------------------------------------------|------------------|------------|--------------------------|--------------------------|---------|---------|
| PCT_CHG_50 AGE SOFA PLAT_COUNT<br>SEPSIS INR HAEMOGLOBIN ALBUMIN     | PCT_CHG_50       | 1.994      | 1.505                    | 2.643                    | <.0001  | 1426.91 |
|                                                                      | AGE              | 1.025      | 1.015                    | 1.034                    | <.0001  |         |
|                                                                      | SOFA             | 1.399      | 1.108                    | 1.766                    | 0.0048  |         |
|                                                                      | PLAT_COUNT       | 0.998      | 0.996                    | 0.999                    | 0.0002  |         |
|                                                                      | SEPSIS           | 1.357      | 1.042                    | 1.768                    | 0.0238  |         |
|                                                                      | INR              | 1.128      | 0.992                    | 1.283                    | 0.0670  |         |
|                                                                      | HAEMOGLOBIN      | 0.993      | 0.986                    | 1.000                    | 0.0403  |         |
|                                                                      | ALBUMIN          | 0.971      | 0.952                    | 0.990                    | 0.0024  |         |
| PCT_CHG_50 AGE SOFA PLAT_COUNT<br>SEPSIS INR HAEMOGLOBIN ALBUMIN TRT | PCT_CHG_50       | 1.986      | 1.499                    | 2.633                    | <.0001  | 1428.03 |
|                                                                      | AGE              | 1.025      | 1.015                    | 1.034                    | <.0001  |         |
|                                                                      | SOFA             | 1.401      | 1.110                    | 1.769                    | 0.0047  |         |
|                                                                      | PLAT_COUNT       | 0.998      | 0.996                    | 0.999                    | 0.0002  |         |
|                                                                      | SEPSIS           | 1.353      | 1.038                    | 1.763                    | 0.0255  |         |
|                                                                      | INR              | 1.130      | 0.993                    | 1.286                    | 0.0640  |         |
|                                                                      | HAEMOGLOBIN      | 0.993      | 0.986                    | 1.000                    | 0.0417  |         |
|                                                                      | ALBUMIN          | 0.971      | 0.952                    | 0.989                    | 0.0023  |         |
|                                                                      | Trt: High vs. Lo | 1.129      | 0.876                    | 1.454                    | 0.3494  |         |
| PCT_CHG_50 AGE SOFA PLAT_COUNT<br>SEPSIS HAEMOGLOBIN ALBUMIN         | PCT_CHG_50       | 2.065      | 1.562                    | 2.729                    | <.0001  | 1428.27 |
|                                                                      | AGE              | 1.024      | 1.015                    | 1.034                    | <.0001  |         |
|                                                                      | SOFA             | 1.411      | 1.118                    | 1.781                    | 0.0038  |         |
|                                                                      | PLAT_COUNT       | 0.998      | 0.996                    | 0.999                    | 0.0002  |         |
|                                                                      | SEPSIS           | 1.358      | 1.042                    | 1.768                    | 0.0236  |         |
|                                                                      | HAEMOGLOBIN      | 0.993      | 0.986                    | 1.000                    | 0.0505  |         |
|                                                                      | ALBUMIN          | 0.972      | 0.953                    | 0.990                    | 0.0032  |         |
| PCT_CHG_50 AGE SEX SOFA PLAT_COUNT<br>SEPSIS INR HAEMOGLOBIN ALBUMIN | PCT_CHG_50       | 2.007      | 1.513                    | 2.662                    | <.0001  | 1428.45 |
|                                                                      | AGE              | 1.025      | 1.015                    | 1.034                    | <.0001  |         |
|                                                                      | Female vs. Male  | 0.911      | 0.696                    | 1.192                    | 0.4963  |         |
|                                                                      | SOFA             | 1.401      | 1.109                    | 1.769                    | 0.0047  |         |
|                                                                      | PLAT_COUNT       | 0.998      | 0.996                    | 0.999                    | 0.0002  |         |
|                                                                      | SEPSIS           | 1.358      | 1.042                    | 1.770                    | 0.0235  |         |
|                                                                      | INR              | 1.131      | 0.994                    | 1.286                    | 0.0627  |         |
|                                                                      | HAEMOGLOBIN      | 0.993      | 0.986                    | 1.000                    | 0.0388  |         |
|                                                                      | ALBUMIN          | 0.971      | 0.952                    | 0.989                    | 0.0023  |         |

| Model Variables                                                                      | Predictor        | Odds Ratio | OR 95% CI<br>Lower Bound | OR 95% CI<br>Upper Bound | p-value | AIC     |
|--------------------------------------------------------------------------------------|------------------|------------|--------------------------|--------------------------|---------|---------|
| PCT_CHG_50 AGE SOFA PLAT_COUNT<br>SEPSIS INR HAEMOGLOBIN<br>WHITE_CELL_COUNT ALBUMIN | PCT_CHG_50       | 1.977      | 1.490                    | 2.623                    | <.0001  | 1428.45 |
|                                                                                      | AGE              | 1.025      | 1.015                    | 1.034                    | <.0001  |         |
|                                                                                      | SOFA             | 1.398      | 1.107                    | 1.765                    | 0.0050  |         |
|                                                                                      | PLAT_COUNT       | 0.998      | 0.996                    | 0.999                    | 0.0002  |         |
|                                                                                      | SEPSIS           | 1.348      | 1.033                    | 1.757                    | 0.0278  |         |
|                                                                                      | INR              | 1.129      | 0.993                    | 1.285                    | 0.0647  |         |
|                                                                                      | HAEMOGLOBIN      | 0.993      | 0.986                    | 1.000                    | 0.0415  |         |
|                                                                                      | WHITE_CELL_COUNT | 1.002      | 0.996                    | 1.007                    | 0.5280  |         |
|                                                                                      | ALBUMIN          | 0.971      | 0.952                    | 0.989                    | 0.0023  |         |

| Model Variables                                                                      | Predictor        | Odds Ratio | OR 95% CI<br>Lower Bound | OR 95% CI<br>Upper Bound | p-value | AIC     |
|--------------------------------------------------------------------------------------|------------------|------------|--------------------------|--------------------------|---------|---------|
| PCT_CHG_60 AGE SOFA PLAT_COUNT<br>SEPSIS INR HAEMOGLOBIN ALBUMIN                     | PCT_CHG_60       | 1.838      | 1.333                    | 2.535                    | 0.0002  | 1436.31 |
|                                                                                      | AGE              | 1.025      | 1.015                    | 1.034                    | <.0001  |         |
|                                                                                      | SOFA             | 1.446      | 1.146                    | 1.824                    | 0.0019  |         |
|                                                                                      | PLAT_COUNT       | 0.998      | 0.997                    | 0.999                    | 0.0005  |         |
|                                                                                      | SEPSIS           | 1.387      | 1.066                    | 1.804                    | 0.0150  |         |
|                                                                                      | INR              | 1.141      | 1.003                    | 1.299                    | 0.0460  |         |
|                                                                                      | HAEMOGLOBIN      | 0.993      | 0.986                    | 1.000                    | 0.0519  |         |
|                                                                                      | ALBUMIN          | 0.972      | 0.954                    | 0.991                    | 0.0037  |         |
| PCT_CHG_60 AGE SOFA PLAT_COUNT<br>SEPSIS INR HAEMOGLOBIN ALBUMIN TRT                 | PCT_CHG_60       | 1.832      | 1.328                    | 2.526                    | 0.0002  | 1437.30 |
|                                                                                      | AGE              | 1.025      | 1.015                    | 1.034                    | <.0001  |         |
|                                                                                      | SOFA             | 1.448      | 1.148                    | 1.827                    | 0.0018  |         |
|                                                                                      | PLAT_COUNT       | 0.998      | 0.997                    | 0.999                    | 0.0004  |         |
|                                                                                      | SEPSIS           | 1.382      | 1.062                    | 1.799                    | 0.0161  |         |
|                                                                                      | INR              | 1.143      | 1.004                    | 1.302                    | 0.0437  |         |
|                                                                                      | HAEMOGLOBIN      | 0.993      | 0.986                    | 1.000                    | 0.0535  |         |
|                                                                                      | ALBUMIN          | 0.972      | 0.954                    | 0.991                    | 0.0035  |         |
|                                                                                      | Trt: High vs. Lo | 1.138      | 0.884                    | 1.465                    | 0.3147  |         |
| PCT_CHG_60 AGE SOFA PLAT_COUNT<br>SEPSIS INR HAEMOGLOBIN<br>WHITE_CELL_COUNT ALBUMIN | PCT_CHG_60       | 1.816      | 1.315                    | 2.509                    | 0.0003  | 1437.74 |
|                                                                                      | AGE              | 1.025      | 1.015                    | 1.034                    | <.0001  |         |
|                                                                                      | SOFA             | 1.444      | 1.144                    | 1.821                    | 0.0020  |         |
|                                                                                      | PLAT_COUNT       | 0.998      | 0.997                    | 0.999                    | 0.0004  |         |
|                                                                                      | SEPSIS           | 1.376      | 1.057                    | 1.791                    | 0.0180  |         |
|                                                                                      | INR              | 1.142      | 1.004                    | 1.300                    | 0.0440  |         |
|                                                                                      | HAEMOGLOBIN      | 0.993      | 0.986                    | 1.000                    | 0.0534  |         |
|                                                                                      | WHITE_CELL_COUNT | 1.002      | 0.996                    | 1.008                    | 0.4885  |         |
|                                                                                      | ALBUMIN          | 0.972      | 0.953                    | 0.991                    | 0.0034  |         |
| PCT_CHG_60 AGE SEX SOFA PLAT_COUNT<br>SEPSIS INR HAEMOGLOBIN ALBUMIN                 | PCT_CHG_60       | 1.849      | 1.340                    | 2.552                    | 0.0002  | 1437.97 |
|                                                                                      | AGE              | 1.025      | 1.015                    | 1.034                    | <.0001  |         |
|                                                                                      | Female vs. Male  | 0.923      | 0.706                    | 1.206                    | 0.5571  |         |
|                                                                                      | SOFA             | 1.448      | 1.148                    | 1.827                    | 0.0018  |         |
|                                                                                      | PLAT_COUNT       | 0.998      | 0.997                    | 0.999                    | 0.0005  |         |
|                                                                                      | SEPSIS           | 1.387      | 1.066                    | 1.805                    | 0.0149  |         |
|                                                                                      | INR              | 1.143      | 1.004                    | 1.302                    | 0.0432  |         |
|                                                                                      | HAEMOGLOBIN      | 0.993      | 0.986                    | 1.000                    | 0.0504  |         |

| Model Variables                                                      | Predictor  | Odds Ratio | OR 95% CI<br>Lower Bound | OR 95% CI<br>Upper Bound | p-value | AIC     |
|----------------------------------------------------------------------|------------|------------|--------------------------|--------------------------|---------|---------|
| PCT_CHG_60 AGE SEX SOFA PLAT_COUNT<br>SEPSIS INR HAEMOGLOBIN ALBUMIN | ALBUMIN    | 0.972      | 0.953                    | 0.991                    | 0.0035  | 1437.97 |
| PCT_CHG_60 AGE SOFA PLAT_COUNT<br>SEPSIS INR ALBUMIN                 | PCT_CHG_60 | 1.771      | 1.288                    | 2.433                    | 0.0004  | 1438.18 |
|                                                                      | AGE        | 1.025      | 1.015                    | 1.034                    | <.0001  |         |
|                                                                      | SOFA       | 1.438      | 1.141                    | 1.812                    | 0.0021  |         |
|                                                                      | PLAT_COUNT | 0.998      | 0.997                    | 0.999                    | 0.0003  |         |
|                                                                      | SEPSIS     | 1.362      | 1.048                    | 1.770                    | 0.0209  |         |
|                                                                      | INR        | 1.131      | 0.995                    | 1.285                    | 0.0592  |         |
|                                                                      | ALBUMIN    | 0.969      | 0.951                    | 0.988                    | 0.0013  |         |



| Model Variables                                                      | Predictor        | Odds Ratio | OR 95% CI Lower Bound | OR 95% CI Upper Bound | p-value | AIC     |
|----------------------------------------------------------------------|------------------|------------|-----------------------|-----------------------|---------|---------|
| NADIR_GE100 AGE SOFA SEPSIS INR HAEMOGLOBIN ALBUMIN                  | NADIR_GE100      | 0.501      | 0.380                 | 0.661                 | <.0001  | 1434.92 |
|                                                                      | AGE              | 1.026      | 1.016                 | 1.035                 | <.0001  |         |
|                                                                      | SOFA             | 1.423      | 1.135                 | 1.783                 | 0.0023  |         |
|                                                                      | SEPSIS           | 1.373      | 1.057                 | 1.782                 | 0.0177  |         |
|                                                                      | INR              | 1.146      | 1.007                 | 1.304                 | 0.0391  |         |
|                                                                      | HAEMOGLOBIN      | 0.993      | 0.987                 | 1.000                 | 0.0613  |         |
|                                                                      | ALBUMIN          | 0.971      | 0.952                 | 0.989                 | 0.0022  |         |
| NADIR_GE100 AGE SOFA SEPSIS INR HAEMOGLOBIN ALBUMIN TRT              | NADIR_GE100      | 0.497      | 0.377                 | 0.656                 | <.0001  | 1435.39 |
|                                                                      | AGE              | 1.026      | 1.016                 | 1.035                 | <.0001  |         |
|                                                                      | SOFA             | 1.422      | 1.134                 | 1.783                 | 0.0024  |         |
|                                                                      | SEPSIS           | 1.366      | 1.051                 | 1.774                 | 0.0197  |         |
|                                                                      | INR              | 1.149      | 1.008                 | 1.308                 | 0.0371  |         |
|                                                                      | HAEMOGLOBIN      | 0.994      | 0.987                 | 1.000                 | 0.0633  |         |
|                                                                      | ALBUMIN          | 0.970      | 0.952                 | 0.989                 | 0.0021  |         |
|                                                                      | Trt: High vs. Lo | 1.172      | 0.911                 | 1.509                 | 0.2169  |         |
| NADIR_GE100 AGE SOFA SEPSIS INR HAEMOGLOBIN WHITE_CELL_COUNT ALBUMIN | NADIR_GE100      | 0.500      | 0.379                 | 0.660                 | <.0001  | 1436.01 |
|                                                                      | AGE              | 1.026      | 1.016                 | 1.035                 | <.0001  |         |
|                                                                      | SOFA             | 1.422      | 1.134                 | 1.783                 | 0.0023  |         |
|                                                                      | SEPSIS           | 1.357      | 1.044                 | 1.764                 | 0.0228  |         |
|                                                                      | INR              | 1.147      | 1.008                 | 1.305                 | 0.0381  |         |
|                                                                      | HAEMOGLOBIN      | 0.993      | 0.987                 | 1.000                 | 0.0618  |         |
|                                                                      | WHITE_CELL_COUNT | 1.002      | 0.997                 | 1.008                 | 0.3858  |         |
|                                                                      | ALBUMIN          | 0.970      | 0.952                 | 0.989                 | 0.0021  |         |
| NADIR_GE100 AGE SOFA PLAT_COUNT SEPSIS INR HAEMOGLOBIN ALBUMIN       | NADIR_GE100      | 0.540      | 0.389                 | 0.749                 | 0.0002  | 1436.24 |
|                                                                      | AGE              | 1.026      | 1.016                 | 1.035                 | <.0001  |         |
|                                                                      | SOFA             | 1.390      | 1.102                 | 1.754                 | 0.0056  |         |
|                                                                      | PLAT_COUNT       | 0.999      | 0.998                 | 1.001                 | 0.4142  |         |
|                                                                      | SEPSIS           | 1.389      | 1.068                 | 1.806                 | 0.0145  |         |
|                                                                      | INR              | 1.150      | 1.011                 | 1.309                 | 0.0341  |         |
|                                                                      | HAEMOGLOBIN      | 0.994      | 0.987                 | 1.001                 | 0.0716  |         |
|                                                                      | ALBUMIN          | 0.970      | 0.952                 | 0.989                 | 0.0021  |         |

| Model Variables                                                                | Predictor        | Odds Ratio | OR 95% CI<br>Lower Bound | OR 95% CI<br>Upper Bound | p-value | AIC     |
|--------------------------------------------------------------------------------|------------------|------------|--------------------------|--------------------------|---------|---------|
| NADIR_GE100 AGE SOFA SEPSIS INR<br>HAEMOGLOBIN WHITE_CELL_COUNT<br>ALBUMIN TRT | NADIR_GE100      | 0.496      | 0.376                    | 0.655                    | <.0001  | 1436.45 |
|                                                                                | AGE              | 1.026      | 1.016                    | 1.035                    | <.0001  |         |
|                                                                                | SOFA             | 1.422      | 1.133                    | 1.783                    | 0.0024  |         |
|                                                                                | SEPSIS           | 1.350      | 1.038                    | 1.756                    | 0.0254  |         |
|                                                                                | INR              | 1.150      | 1.009                    | 1.309                    | 0.0361  |         |
|                                                                                | HAEMOGLOBIN      | 0.994      | 0.987                    | 1.000                    | 0.0639  |         |
|                                                                                | WHITE_CELL_COUNT | 1.002      | 0.997                    | 1.008                    | 0.3755  |         |
|                                                                                | ALBUMIN          | 0.970      | 0.952                    | 0.989                    | 0.0019  |         |
|                                                                                | Trt: High vs. Lo | 1.175      | 0.913                    | 1.512                    | 0.2116  |         |
| NADIR_GE100 AGE SEX SOFA SEPSIS INR<br>HAEMOGLOBIN ALBUMIN                     | NADIR_GE100      | 0.501      | 0.379                    | 0.660                    | <.0001  | 1436.48 |
|                                                                                | AGE              | 1.026      | 1.016                    | 1.035                    | <.0001  |         |
|                                                                                | Female vs. Male  | 0.914      | 0.701                    | 1.193                    | 0.5103  |         |
|                                                                                | SOFA             | 1.422      | 1.134                    | 1.783                    | 0.0024  |         |
|                                                                                | SEPSIS           | 1.374      | 1.058                    | 1.785                    | 0.0172  |         |
|                                                                                | INR              | 1.149      | 1.009                    | 1.308                    | 0.0362  |         |
|                                                                                | HAEMOGLOBIN      | 0.993      | 0.987                    | 1.000                    | 0.0601  |         |
|                                                                                | ALBUMIN          | 0.970      | 0.952                    | 0.989                    | 0.0021  |         |
| NADIR_GE100 AGE SOFA SEPSIS INR<br>ALBUMIN                                     | NADIR_GE100      | 0.505      | 0.383                    | 0.666                    | <.0001  | 1436.50 |
|                                                                                | AGE              | 1.026      | 1.016                    | 1.035                    | <.0001  |         |
|                                                                                | SOFA             | 1.422      | 1.136                    | 1.782                    | 0.0022  |         |
|                                                                                | SEPSIS           | 1.345      | 1.037                    | 1.745                    | 0.0255  |         |
|                                                                                | INR              | 1.135      | 0.999                    | 1.289                    | 0.0529  |         |
|                                                                                | ALBUMIN          | 0.968      | 0.950                    | 0.987                    | 0.0009  |         |
| NADIR_GE100 AGE SOFA PLAT_COUNT<br>SEPSIS INR HAEMOGLOBIN ALBUMIN TRT          | NADIR_GE100      | 0.535      | 0.385                    | 0.743                    | 0.0002  | 1436.71 |
|                                                                                | AGE              | 1.026      | 1.016                    | 1.035                    | <.0001  |         |
|                                                                                | SOFA             | 1.390      | 1.101                    | 1.754                    | 0.0057  |         |
|                                                                                | PLAT_COUNT       | 0.999      | 0.998                    | 1.001                    | 0.4140  |         |
|                                                                                | SEPSIS           | 1.382      | 1.062                    | 1.798                    | 0.0161  |         |
|                                                                                | INR              | 1.153      | 1.012                    | 1.313                    | 0.0324  |         |
|                                                                                | HAEMOGLOBIN      | 0.994      | 0.987                    | 1.001                    | 0.0735  |         |
|                                                                                | ALBUMIN          | 0.970      | 0.952                    | 0.989                    | 0.0020  |         |
|                                                                                | Trt: High vs. Lo | 1.173      | 0.911                    | 1.509                    | 0.2169  |         |

| Model Variables                                | Predictor        | Odds Ratio | OR 95% CI<br>Lower Bound | OR 95% CI<br>Upper Bound | p-value | AIC     |
|------------------------------------------------|------------------|------------|--------------------------|--------------------------|---------|---------|
| NADIR_GE100 AGE SOFA SEPSIS INR<br>ALBUMIN TRT | NADIR_GE100      | 0.501      | 0.380                    | 0.661                    | <.0001  | 1436.92 |
|                                                | AGE              | 1.026      | 1.016                    | 1.035                    | <.0001  |         |
|                                                | SOFA             | 1.423      | 1.135                    | 1.783                    | 0.0022  |         |
|                                                | SEPSIS           | 1.339      | 1.032                    | 1.737                    | 0.0282  |         |
|                                                | INR              | 1.137      | 1.000                    | 1.294                    | 0.0501  |         |
|                                                | ALBUMIN          | 0.968      | 0.950                    | 0.987                    | 0.0008  |         |
|                                                | Trt: High vs. Lo | 1.175      | 0.914                    | 1.512                    | 0.2088  |         |

| Model Variables                                                                      | Predictor        | Odds Ratio | OR 95% CI<br>Lower Bound | OR 95% CI<br>Upper Bound | p-value | AIC     |
|--------------------------------------------------------------------------------------|------------------|------------|--------------------------|--------------------------|---------|---------|
| PCT_CHG_30 AGE SOFA PLAT_COUNT<br>SEPSIS INR HAEMOGLOBIN ALBUMIN                     | PCT_CHG_30       | 1.554      | 1.208                    | 1.999                    | 0.0006  | 1538.37 |
|                                                                                      | AGE              | 1.025      | 1.016                    | 1.034                    | <.0001  |         |
|                                                                                      | SOFA             | 1.341      | 1.074                    | 1.673                    | 0.0096  |         |
|                                                                                      | PLAT_COUNT       | 0.998      | 0.996                    | 0.999                    | <.0001  |         |
|                                                                                      | SEPSIS           | 1.331      | 1.036                    | 1.710                    | 0.0257  |         |
|                                                                                      | INR              | 1.145      | 1.008                    | 1.301                    | 0.0377  |         |
|                                                                                      | HAEMOGLOBIN      | 0.990      | 0.984                    | 0.997                    | 0.0042  |         |
|                                                                                      | ALBUMIN          | 0.970      | 0.953                    | 0.988                    | 0.0012  |         |
| PCT_CHG_30 AGE SEX SOFA PLAT_COUNT<br>SEPSIS INR HAEMOGLOBIN ALBUMIN                 | PCT_CHG_30       | 1.560      | 1.212                    | 2.007                    | 0.0006  | 1540.08 |
|                                                                                      | AGE              | 1.025      | 1.016                    | 1.034                    | <.0001  |         |
|                                                                                      | Female vs. Male  | 0.932      | 0.722                    | 1.203                    | 0.5874  |         |
|                                                                                      | SOFA             | 1.342      | 1.075                    | 1.675                    | 0.0094  |         |
|                                                                                      | PLAT_COUNT       | 0.998      | 0.996                    | 0.999                    | <.0001  |         |
|                                                                                      | SEPSIS           | 1.332      | 1.036                    | 1.712                    | 0.0253  |         |
|                                                                                      | INR              | 1.147      | 1.010                    | 1.303                    | 0.0355  |         |
|                                                                                      | HAEMOGLOBIN      | 0.990      | 0.984                    | 0.997                    | 0.0041  |         |
|                                                                                      | ALBUMIN          | 0.970      | 0.953                    | 0.988                    | 0.0011  |         |
| PCT_CHG_30 AGE SOFA PLAT_COUNT<br>SEPSIS INR HAEMOGLOBIN ALBUMIN TRT                 | PCT_CHG_30       | 1.557      | 1.210                    | 2.003                    | 0.0006  | 1540.21 |
|                                                                                      | AGE              | 1.025      | 1.016                    | 1.034                    | <.0001  |         |
|                                                                                      | SOFA             | 1.341      | 1.075                    | 1.674                    | 0.0095  |         |
|                                                                                      | PLAT_COUNT       | 0.998      | 0.996                    | 0.999                    | <.0001  |         |
|                                                                                      | SEPSIS           | 1.329      | 1.034                    | 1.707                    | 0.0267  |         |
|                                                                                      | INR              | 1.146      | 1.008                    | 1.302                    | 0.0372  |         |
|                                                                                      | HAEMOGLOBIN      | 0.990      | 0.984                    | 0.997                    | 0.0042  |         |
|                                                                                      | ALBUMIN          | 0.970      | 0.953                    | 0.988                    | 0.0012  |         |
|                                                                                      | Trt: High vs. Lo | 1.050      | 0.825                    | 1.337                    | 0.6900  |         |
| PCT_CHG_30 AGE SOFA PLAT_COUNT<br>SEPSIS INR HAEMOGLOBIN<br>WHITE_CELL_COUNT ALBUMIN | PCT_CHG_30       | 1.549      | 1.203                    | 1.994                    | 0.0007  | 1540.28 |
|                                                                                      | AGE              | 1.025      | 1.016                    | 1.034                    | <.0001  |         |
|                                                                                      | SOFA             | 1.340      | 1.074                    | 1.673                    | 0.0097  |         |
|                                                                                      | PLAT_COUNT       | 0.998      | 0.996                    | 0.999                    | <.0001  |         |
|                                                                                      | SEPSIS           | 1.327      | 1.032                    | 1.706                    | 0.0278  |         |
|                                                                                      | INR              | 1.145      | 1.008                    | 1.301                    | 0.0372  |         |
|                                                                                      | HAEMOGLOBIN      | 0.990      | 0.984                    | 0.997                    | 0.0043  |         |

| Model Variables                                                                      | Predictor        | Odds Ratio | OR 95% CI<br>Lower Bound | OR 95% CI<br>Upper Bound | p-value | AIC     |
|--------------------------------------------------------------------------------------|------------------|------------|--------------------------|--------------------------|---------|---------|
| PCT_CHG_30 AGE SOFA PLAT_COUNT<br>SEPSIS INR HAEMOGLOBIN<br>WHITE_CELL_COUNT ALBUMIN | WHITE_CELL_COUNT | 1.001      | 0.996                    | 1.006                    | 0.7724  | 1540.28 |
|                                                                                      | ALBUMIN          | 0.970      | 0.953                    | 0.988                    | 0.0012  |         |

| Model Variables                                                                      | Predictor        | Odds Ratio | OR 95% CI<br>Lower Bound | OR 95% CI<br>Upper Bound | p-value | AIC     |
|--------------------------------------------------------------------------------------|------------------|------------|--------------------------|--------------------------|---------|---------|
| PCT_CHG_40 AGE SOFA PLAT_COUNT<br>SEPSIS INR HAEMOGLOBIN ALBUMIN                     | PCT_CHG_40       | 1.620      | 1.253                    | 2.094                    | 0.0002  | 1536.60 |
|                                                                                      | AGE              | 1.025      | 1.016                    | 1.034                    | <.0001  |         |
|                                                                                      | SOFA             | 1.327      | 1.063                    | 1.657                    | 0.0127  |         |
|                                                                                      | PLAT_COUNT       | 0.998      | 0.996                    | 0.999                    | <.0001  |         |
|                                                                                      | SEPSIS           | 1.319      | 1.026                    | 1.696                    | 0.0310  |         |
|                                                                                      | INR              | 1.149      | 1.011                    | 1.306                    | 0.0333  |         |
|                                                                                      | HAEMOGLOBIN      | 0.990      | 0.984                    | 0.997                    | 0.0037  |         |
|                                                                                      | ALBUMIN          | 0.972      | 0.954                    | 0.990                    | 0.0021  |         |
| PCT_CHG_40 AGE SEX SOFA PLAT_COUNT<br>SEPSIS INR HAEMOGLOBIN ALBUMIN                 | PCT_CHG_40       | 1.632      | 1.261                    | 2.113                    | 0.0002  | 1538.15 |
|                                                                                      | AGE              | 1.025      | 1.016                    | 1.033                    | <.0001  |         |
|                                                                                      | Female vs. Male  | 0.916      | 0.709                    | 1.183                    | 0.4997  |         |
|                                                                                      | SOFA             | 1.328      | 1.063                    | 1.659                    | 0.0125  |         |
|                                                                                      | PLAT_COUNT       | 0.998      | 0.996                    | 0.999                    | <.0001  |         |
|                                                                                      | SEPSIS           | 1.320      | 1.026                    | 1.697                    | 0.0307  |         |
|                                                                                      | INR              | 1.152      | 1.013                    | 1.309                    | 0.0309  |         |
|                                                                                      | HAEMOGLOBIN      | 0.990      | 0.984                    | 0.997                    | 0.0035  |         |
|                                                                                      | ALBUMIN          | 0.972      | 0.954                    | 0.989                    | 0.0020  |         |
| PCT_CHG_40 AGE SOFA PLAT_COUNT<br>SEPSIS INR HAEMOGLOBIN ALBUMIN TRT                 | PCT_CHG_40       | 1.622      | 1.254                    | 2.097                    | 0.0002  | 1538.47 |
|                                                                                      | AGE              | 1.025      | 1.016                    | 1.034                    | <.0001  |         |
|                                                                                      | SOFA             | 1.327      | 1.063                    | 1.658                    | 0.0126  |         |
|                                                                                      | PLAT_COUNT       | 0.998      | 0.996                    | 0.999                    | <.0001  |         |
|                                                                                      | SEPSIS           | 1.317      | 1.024                    | 1.693                    | 0.0321  |         |
|                                                                                      | INR              | 1.150      | 1.012                    | 1.307                    | 0.0327  |         |
|                                                                                      | HAEMOGLOBIN      | 0.990      | 0.984                    | 0.997                    | 0.0037  |         |
|                                                                                      | ALBUMIN          | 0.972      | 0.954                    | 0.990                    | 0.0021  |         |
|                                                                                      | Trt: High vs. Lo | 1.046      | 0.822                    | 1.331                    | 0.7169  |         |
| PCT_CHG_40 AGE SOFA PLAT_COUNT<br>SEPSIS INR HAEMOGLOBIN<br>WHITE_CELL_COUNT ALBUMIN | PCT_CHG_40       | 1.615      | 1.248                    | 2.090                    | 0.0003  | 1538.53 |
|                                                                                      | AGE              | 1.025      | 1.016                    | 1.034                    | <.0001  |         |
|                                                                                      | SOFA             | 1.326      | 1.062                    | 1.657                    | 0.0128  |         |
|                                                                                      | PLAT_COUNT       | 0.998      | 0.996                    | 0.999                    | <.0001  |         |
|                                                                                      | SEPSIS           | 1.315      | 1.022                    | 1.692                    | 0.0333  |         |
|                                                                                      | INR              | 1.150      | 1.012                    | 1.306                    | 0.0329  |         |
|                                                                                      | HAEMOGLOBIN      | 0.990      | 0.984                    | 0.997                    | 0.0038  |         |

| Model Variables                                                                      | Predictor        | Odds Ratio | OR 95% CI<br>Lower Bound | OR 95% CI<br>Upper Bound | p-value | AIC     |
|--------------------------------------------------------------------------------------|------------------|------------|--------------------------|--------------------------|---------|---------|
| PCT_CHG_40 AGE SOFA PLAT_COUNT<br>SEPSIS INR HAEMOGLOBIN<br>WHITE_CELL_COUNT ALBUMIN | WHITE_CELL_COUNT | 1.001      | 0.996                    | 1.005                    | 0.7942  | 1538.53 |
|                                                                                      | ALBUMIN          | 0.972      | 0.954                    | 0.990                    | 0.0021  |         |

| Model Variables                                                                | Predictor        | Odds Ratio | OR 95% CI Lower Bound | OR 95% CI Upper Bound | p-value | AIC     |
|--------------------------------------------------------------------------------|------------------|------------|-----------------------|-----------------------|---------|---------|
| PCT_CHG_50 AGE SOFA PLAT_COUNT SEPSIS INR HAEMOGLOBIN ALBUMIN                  | PCT_CHG_50       | 1.740      | 1.322                 | 2.290                 | <.0001  | 1534.55 |
|                                                                                | AGE              | 1.025      | 1.016                 | 1.034                 | <.0001  |         |
|                                                                                | SOFA             | 1.333      | 1.068                 | 1.664                 | 0.0112  |         |
|                                                                                | PLAT_COUNT       | 0.998      | 0.997                 | 0.999                 | <.0001  |         |
|                                                                                | SEPSIS           | 1.306      | 1.015                 | 1.680                 | 0.0381  |         |
|                                                                                | INR              | 1.144      | 1.006                 | 1.301                 | 0.0397  |         |
|                                                                                | HAEMOGLOBIN      | 0.990      | 0.984                 | 0.997                 | 0.0038  |         |
|                                                                                | ALBUMIN          | 0.971      | 0.954                 | 0.989                 | 0.0019  |         |
| PCT_CHG_50 AGE SEX SOFA PLAT_COUNT SEPSIS INR HAEMOGLOBIN ALBUMIN              | PCT_CHG_50       | 1.750      | 1.328                 | 2.305                 | <.0001  | 1536.17 |
|                                                                                | AGE              | 1.025      | 1.016                 | 1.034                 | <.0001  |         |
|                                                                                | Female vs. Male  | 0.923      | 0.715                 | 1.192                 | 0.5402  |         |
|                                                                                | SOFA             | 1.335      | 1.069                 | 1.666                 | 0.0109  |         |
|                                                                                | PLAT_COUNT       | 0.998      | 0.997                 | 0.999                 | <.0001  |         |
|                                                                                | SEPSIS           | 1.307      | 1.016                 | 1.681                 | 0.0377  |         |
|                                                                                | INR              | 1.147      | 1.008                 | 1.304                 | 0.0372  |         |
|                                                                                | HAEMOGLOBIN      | 0.990      | 0.984                 | 0.997                 | 0.0036  |         |
|                                                                                | ALBUMIN          | 0.971      | 0.954                 | 0.989                 | 0.0018  |         |
| PCT_CHG_50 AGE SOFA PLAT_COUNT SEPSIS INR HAEMOGLOBIN WHITE_CELL_COUNT ALBUMIN | PCT_CHG_50       | 1.735      | 1.317                 | 2.287                 | <.0001  | 1536.50 |
|                                                                                | AGE              | 1.025      | 1.016                 | 1.034                 | <.0001  |         |
|                                                                                | SOFA             | 1.333      | 1.068                 | 1.664                 | 0.0113  |         |
|                                                                                | PLAT_COUNT       | 0.998      | 0.997                 | 0.999                 | <.0001  |         |
|                                                                                | SEPSIS           | 1.303      | 1.012                 | 1.678                 | 0.0402  |         |
|                                                                                | INR              | 1.145      | 1.007                 | 1.302                 | 0.0394  |         |
|                                                                                | HAEMOGLOBIN      | 0.990      | 0.984                 | 0.997                 | 0.0038  |         |
|                                                                                | WHITE_CELL_COUNT | 1.000      | 0.996                 | 1.005                 | 0.8413  |         |
|                                                                                | ALBUMIN          | 0.971      | 0.954                 | 0.989                 | 0.0018  |         |
| PCT_CHG_50 AGE SOFA PLAT_COUNT SEPSIS INR HAEMOGLOBIN ALBUMIN TRT              | PCT_CHG_50       | 1.739      | 1.321                 | 2.289                 | <.0001  | 1536.52 |
|                                                                                | AGE              | 1.025      | 1.016                 | 1.034                 | <.0001  |         |
|                                                                                | SOFA             | 1.334      | 1.068                 | 1.665                 | 0.0111  |         |
|                                                                                | PLAT_COUNT       | 0.998      | 0.997                 | 0.999                 | <.0001  |         |
|                                                                                | SEPSIS           | 1.305      | 1.014                 | 1.679                 | 0.0386  |         |
|                                                                                | INR              | 1.145      | 1.007                 | 1.302                 | 0.0395  |         |
|                                                                                | HAEMOGLOBIN      | 0.990      | 0.984                 | 0.997                 | 0.0038  |         |



| Model Variables                                                      | Predictor        | Odds Ratio | OR 95% CI<br>Lower Bound | OR 95% CI<br>Upper Bound | p-value | AIC     |
|----------------------------------------------------------------------|------------------|------------|--------------------------|--------------------------|---------|---------|
| PCT_CHG_50 AGE SOFA PLAT_COUNT<br>SEPSIS INR HAEMOGLOBIN ALBUMIN TRT | ALBUMIN          | 0.971      | 0.954                    | 0.989                    | 0.0019  | 1536.52 |
|                                                                      | Trt: High vs. Lo | 1.018      | 0.800                    | 1.296                    | 0.8840  |         |

| Model Variables                                                                      | Predictor        | Odds Ratio | OR 95% CI<br>Lower Bound | OR 95% CI<br>Upper Bound | p-value | AIC     |
|--------------------------------------------------------------------------------------|------------------|------------|--------------------------|--------------------------|---------|---------|
| PCT_CHG_60 AGE SOFA PLAT_COUNT<br>SEPSIS INR HAEMOGLOBIN ALBUMIN                     | PCT_CHG_60       | 1.670      | 1.217                    | 2.292                    | 0.0015  | 1540.10 |
|                                                                                      | AGE              | 1.025      | 1.016                    | 1.034                    | <.0001  |         |
|                                                                                      | SOFA             | 1.368      | 1.097                    | 1.707                    | 0.0056  |         |
|                                                                                      | PLAT_COUNT       | 0.998      | 0.997                    | 0.999                    | 0.0001  |         |
|                                                                                      | SEPSIS           | 1.326      | 1.031                    | 1.704                    | 0.0279  |         |
|                                                                                      | INR              | 1.155      | 1.015                    | 1.314                    | 0.0294  |         |
|                                                                                      | HAEMOGLOBIN      | 0.991      | 0.984                    | 0.997                    | 0.0050  |         |
|                                                                                      | ALBUMIN          | 0.973      | 0.955                    | 0.990                    | 0.0027  |         |
| PCT_CHG_60 AGE SEX SOFA PLAT_COUNT<br>SEPSIS INR HAEMOGLOBIN ALBUMIN                 | PCT_CHG_60       | 1.680      | 1.223                    | 2.306                    | 0.0014  | 1541.80 |
|                                                                                      | AGE              | 1.025      | 1.016                    | 1.034                    | <.0001  |         |
|                                                                                      | Female vs. Male  | 0.931      | 0.722                    | 1.202                    | 0.5843  |         |
|                                                                                      | SOFA             | 1.370      | 1.098                    | 1.710                    | 0.0054  |         |
|                                                                                      | PLAT_COUNT       | 0.998      | 0.997                    | 0.999                    | 0.0001  |         |
|                                                                                      | SEPSIS           | 1.326      | 1.032                    | 1.705                    | 0.0277  |         |
|                                                                                      | INR              | 1.157      | 1.016                    | 1.317                    | 0.0277  |         |
|                                                                                      | HAEMOGLOBIN      | 0.990      | 0.984                    | 0.997                    | 0.0048  |         |
|                                                                                      | ALBUMIN          | 0.972      | 0.955                    | 0.990                    | 0.0026  |         |
| PCT_CHG_60 AGE SOFA PLAT_COUNT<br>SEPSIS INR HAEMOGLOBIN<br>WHITE_CELL_COUNT ALBUMIN | PCT_CHG_60       | 1.664      | 1.211                    | 2.286                    | 0.0017  | 1542.03 |
|                                                                                      | AGE              | 1.025      | 1.016                    | 1.034                    | <.0001  |         |
|                                                                                      | SOFA             | 1.367      | 1.096                    | 1.706                    | 0.0057  |         |
|                                                                                      | PLAT_COUNT       | 0.998      | 0.997                    | 0.999                    | 0.0001  |         |
|                                                                                      | SEPSIS           | 1.322      | 1.028                    | 1.701                    | 0.0298  |         |
|                                                                                      | INR              | 1.155      | 1.015                    | 1.315                    | 0.0290  |         |
|                                                                                      | HAEMOGLOBIN      | 0.991      | 0.984                    | 0.997                    | 0.0051  |         |
|                                                                                      | WHITE_CELL_COUNT | 1.001      | 0.996                    | 1.006                    | 0.8026  |         |
|                                                                                      | ALBUMIN          | 0.972      | 0.955                    | 0.990                    | 0.0027  |         |
| PCT_CHG_60 AGE SOFA PLAT_COUNT<br>SEPSIS INR HAEMOGLOBIN ALBUMIN TRT                 | PCT_CHG_60       | 1.669      | 1.216                    | 2.290                    | 0.0016  | 1542.06 |
|                                                                                      | AGE              | 1.025      | 1.016                    | 1.034                    | <.0001  |         |
|                                                                                      | SOFA             | 1.369      | 1.097                    | 1.708                    | 0.0055  |         |
|                                                                                      | PLAT_COUNT       | 0.998      | 0.997                    | 0.999                    | 0.0001  |         |
|                                                                                      | SEPSIS           | 1.325      | 1.031                    | 1.703                    | 0.0284  |         |
|                                                                                      | INR              | 1.155      | 1.015                    | 1.315                    | 0.0291  |         |
|                                                                                      | HAEMOGLOBIN      | 0.991      | 0.984                    | 0.997                    | 0.0050  |         |

| Model Variables                                                      | Predictor        | Odds Ratio | OR 95% CI<br>Lower Bound | OR 95% CI<br>Upper Bound | p-value | AIC     |
|----------------------------------------------------------------------|------------------|------------|--------------------------|--------------------------|---------|---------|
| PCT_CHG_60 AGE SOFA PLAT_COUNT<br>SEPSIS INR HAEMOGLOBIN ALBUMIN TRT | ALBUMIN          | 0.972      | 0.955                    | 0.990                    | 0.0027  | 1542.06 |
|                                                                      | Trt: High vs. Lo | 1.024      | 0.805                    | 1.303                    | 0.8456  |         |

| Model Variables                                                       | Predictor       | Odds Ratio | OR 95% CI<br>Lower Bound | OR 95% CI<br>Upper Bound | p-value | AIC     |
|-----------------------------------------------------------------------|-----------------|------------|--------------------------|--------------------------|---------|---------|
| NADIR_GE100 AGE SOFA SEPSIS INR<br>HAEMOGLOBIN ALBUMIN                | NADIR_GE100     | 0.519      | 0.399                    | 0.676                    | <.0001  | 1538.40 |
|                                                                       | AGE             | 1.026      | 1.017                    | 1.035                    | <.0001  |         |
|                                                                       | SOFA            | 1.363      | 1.098                    | 1.692                    | 0.0051  |         |
|                                                                       | SEPSIS          | 1.299      | 1.012                    | 1.666                    | 0.0401  |         |
|                                                                       | INR             | 1.154      | 1.015                    | 1.313                    | 0.0295  |         |
|                                                                       | HAEMOGLOBIN     | 0.991      | 0.984                    | 0.997                    | 0.0049  |         |
|                                                                       | ALBUMIN         | 0.972      | 0.954                    | 0.989                    | 0.0019  |         |
| NADIR_GE100 AGE SOFA PLAT_COUNT<br>SEPSIS INR HAEMOGLOBIN ALBUMIN     | NADIR_GE100     | 0.583      | 0.427                    | 0.795                    | 0.0007  | 1538.52 |
|                                                                       | AGE             | 1.026      | 1.017                    | 1.035                    | <.0001  |         |
|                                                                       | SOFA            | 1.315      | 1.053                    | 1.642                    | 0.0160  |         |
|                                                                       | PLAT_COUNT      | 0.999      | 0.998                    | 1.000                    | 0.1754  |         |
|                                                                       | SEPSIS          | 1.325      | 1.031                    | 1.703                    | 0.0283  |         |
|                                                                       | INR             | 1.161      | 1.020                    | 1.320                    | 0.0237  |         |
|                                                                       | HAEMOGLOBIN     | 0.991      | 0.984                    | 0.998                    | 0.0069  |         |
|                                                                       | ALBUMIN         | 0.971      | 0.954                    | 0.989                    | 0.0017  |         |
| NADIR_GE100 AGE SEX SOFA SEPSIS INR<br>HAEMOGLOBIN ALBUMIN            | NADIR_GE100     | 0.519      | 0.398                    | 0.675                    | <.0001  | 1539.93 |
|                                                                       | AGE             | 1.026      | 1.017                    | 1.035                    | <.0001  |         |
|                                                                       | Female vs. Male | 0.915      | 0.710                    | 1.180                    | 0.4946  |         |
|                                                                       | SOFA            | 1.362      | 1.097                    | 1.691                    | 0.0053  |         |
|                                                                       | SEPSIS          | 1.300      | 1.013                    | 1.668                    | 0.0391  |         |
|                                                                       | INR             | 1.157      | 1.017                    | 1.317                    | 0.0271  |         |
|                                                                       | HAEMOGLOBIN     | 0.991      | 0.984                    | 0.997                    | 0.0048  |         |
|                                                                       | ALBUMIN         | 0.971      | 0.954                    | 0.989                    | 0.0018  |         |
| NADIR_GE100 AGE SEX SOFA PLAT_COUNT<br>SEPSIS INR HAEMOGLOBIN ALBUMIN | NADIR_GE100     | 0.579      | 0.424                    | 0.791                    | 0.0006  | 1540.20 |
|                                                                       | AGE             | 1.026      | 1.017                    | 1.035                    | <.0001  |         |
|                                                                       | Female vs. Male | 0.929      | 0.720                    | 1.199                    | 0.5725  |         |
|                                                                       | SOFA            | 1.316      | 1.053                    | 1.643                    | 0.0158  |         |
|                                                                       | PLAT_COUNT      | 0.999      | 0.998                    | 1.000                    | 0.1933  |         |
|                                                                       | SEPSIS          | 1.325      | 1.031                    | 1.704                    | 0.0281  |         |
|                                                                       | INR             | 1.163      | 1.022                    | 1.323                    | 0.0222  |         |
|                                                                       | HAEMOGLOBIN     | 0.991      | 0.984                    | 0.997                    | 0.0067  |         |
|                                                                       | ALBUMIN         | 0.971      | 0.954                    | 0.989                    | 0.0016  |         |

| Model Variables                                                                 | Predictor        | Odds Ratio | OR 95% CI Lower Bound | OR 95% CI Upper Bound | p-value | AIC     |
|---------------------------------------------------------------------------------|------------------|------------|-----------------------|-----------------------|---------|---------|
| NADIR_GE100 AGE SOFA SEPSIS INR HAEMOGLOBIN ALBUMIN TRT                         | NADIR_GE100      | 0.518      | 0.398                 | 0.675                 | <.0001  | 1540.23 |
|                                                                                 | AGE              | 1.026      | 1.017                 | 1.035                 | <.0001  |         |
|                                                                                 | SOFA             | 1.363      | 1.098                 | 1.693                 | 0.0051  |         |
|                                                                                 | SEPSIS           | 1.296      | 1.010                 | 1.663                 | 0.0416  |         |
|                                                                                 | INR              | 1.155      | 1.015                 | 1.315                 | 0.0289  |         |
|                                                                                 | HAEMOGLOBIN      | 0.991      | 0.984                 | 0.997                 | 0.0050  |         |
|                                                                                 | ALBUMIN          | 0.971      | 0.954                 | 0.989                 | 0.0018  |         |
|                                                                                 | Trt: High vs. Lo | 1.052      | 0.827                 | 1.338                 | 0.6807  |         |
| NADIR_GE100 AGE SOFA SEPSIS INR HAEMOGLOBIN WHITE_CELL_COUNT ALBUMIN            | NADIR_GE100      | 0.519      | 0.399                 | 0.676                 | <.0001  | 1540.26 |
|                                                                                 | AGE              | 1.026      | 1.017                 | 1.035                 | <.0001  |         |
|                                                                                 | SOFA             | 1.363      | 1.097                 | 1.692                 | 0.0052  |         |
|                                                                                 | SEPSIS           | 1.293      | 1.007                 | 1.660                 | 0.0444  |         |
|                                                                                 | INR              | 1.155      | 1.015                 | 1.314                 | 0.0292  |         |
|                                                                                 | HAEMOGLOBIN      | 0.991      | 0.984                 | 0.997                 | 0.0050  |         |
|                                                                                 | WHITE_CELL_COUNT | 1.001      | 0.996                 | 1.006                 | 0.7163  |         |
|                                                                                 | ALBUMIN          | 0.971      | 0.954                 | 0.989                 | 0.0018  |         |
| NADIR_GE100 AGE SOFA PLAT_COUNT SEPSIS INR HAEMOGLOBIN WHITE_CELL_COUNT ALBUMIN | NADIR_GE100      | 0.584      | 0.428                 | 0.797                 | 0.0007  | 1540.31 |
|                                                                                 | AGE              | 1.026      | 1.017                 | 1.035                 | <.0001  |         |
|                                                                                 | SOFA             | 1.313      | 1.051                 | 1.640                 | 0.0165  |         |
|                                                                                 | PLAT_COUNT       | 0.999      | 0.998                 | 1.000                 | 0.1672  |         |
|                                                                                 | SEPSIS           | 1.318      | 1.025                 | 1.696                 | 0.0318  |         |
|                                                                                 | INR              | 1.161      | 1.021                 | 1.321                 | 0.0233  |         |
|                                                                                 | HAEMOGLOBIN      | 0.991      | 0.984                 | 0.998                 | 0.0070  |         |
|                                                                                 | WHITE_CELL_COUNT | 1.001      | 0.996                 | 1.006                 | 0.6559  |         |
|                                                                                 | ALBUMIN          | 0.971      | 0.954                 | 0.989                 | 0.0016  |         |
| NADIR_GE100 AGE SOFA PLAT_COUNT SEPSIS INR HAEMOGLOBIN ALBUMIN TRT              | NADIR_GE100      | 0.581      | 0.426                 | 0.793                 | 0.0006  | 1540.36 |
|                                                                                 | AGE              | 1.026      | 1.017                 | 1.035                 | <.0001  |         |
|                                                                                 | SOFA             | 1.315      | 1.053                 | 1.642                 | 0.0160  |         |
|                                                                                 | PLAT_COUNT       | 0.999      | 0.998                 | 1.000                 | 0.1757  |         |
|                                                                                 | SEPSIS           | 1.322      | 1.029                 | 1.700                 | 0.0294  |         |
|                                                                                 | INR              | 1.162      | 1.021                 | 1.322                 | 0.0232  |         |
|                                                                                 | HAEMOGLOBIN      | 0.991      | 0.984                 | 0.998                 | 0.0070  |         |
|                                                                                 | ALBUMIN          | 0.971      | 0.954                 | 0.989                 | 0.0016  |         |
|                                                                                 | Trt: High vs. Lo | 1.052      | 0.826                 | 1.338                 | 0.6828  |         |

## Top models for PCT\_CHG\_30 predicting HOSP\_free\_days

| Model Variables                                                                              | Predictor        | Odds Ratio | OR 95% CI<br>Lower Bound | OR 95% CI<br>Upper Bound | p-value | AIC     |
|----------------------------------------------------------------------------------------------|------------------|------------|--------------------------|--------------------------|---------|---------|
| PCT_CHG_30 AGE SEX SOFA PLAT_COUNT<br>SEPSIS INR HAEMOGLOBIN ALBUMIN TRT                     | PCT_CHG_30       | 0.876      | 0.847                    | 0.905                    | <.0001  | 31019.2 |
|                                                                                              | AGE              | 0.995      | 0.994                    | 0.996                    | <.0001  |         |
|                                                                                              | Female vs. Male  | 1.102      | 1.066                    | 1.139                    | <.0001  |         |
|                                                                                              | SOFA             | 0.869      | 0.844                    | 0.895                    | <.0001  |         |
|                                                                                              | PLAT_COUNT       | 1.001      | 1.001                    | 1.001                    | <.0001  |         |
|                                                                                              | SEPSIS           | 0.846      | 0.819                    | 0.874                    | <.0001  |         |
|                                                                                              | INR              | 0.921      | 0.907                    | 0.936                    | <.0001  |         |
|                                                                                              | HAEMOGLOBIN      | 1.006      | 1.005                    | 1.007                    | <.0001  |         |
|                                                                                              | ALBUMIN          | 1.030      | 1.028                    | 1.033                    | <.0001  |         |
|                                                                                              | Trt: High vs. Lo | 0.938      | 0.909                    | 0.967                    | <.0001  |         |
| PCT_CHG_30 AGE SEX SOFA PLAT_COUNT<br>SEPSIS INR HAEMOGLOBIN<br>WHITE_CELL_COUNT ALBUMIN TRT | PCT_CHG_30       | 0.875      | 0.846                    | 0.905                    | <.0001  | 31020.6 |
|                                                                                              | AGE              | 0.995      | 0.994                    | 0.996                    | <.0001  |         |
|                                                                                              | Female vs. Male  | 1.102      | 1.066                    | 1.139                    | <.0001  |         |
|                                                                                              | SOFA             | 0.869      | 0.844                    | 0.894                    | <.0001  |         |
|                                                                                              | PLAT_COUNT       | 1.001      | 1.001                    | 1.001                    | <.0001  |         |
|                                                                                              | SEPSIS           | 0.845      | 0.818                    | 0.873                    | <.0001  |         |
|                                                                                              | INR              | 0.922      | 0.907                    | 0.937                    | <.0001  |         |
|                                                                                              | HAEMOGLOBIN      | 1.006      | 1.005                    | 1.007                    | <.0001  |         |
|                                                                                              | WHITE_CELL_COUNT | 1.000      | 0.999                    | 1.001                    | 0.4413  |         |
|                                                                                              | ALBUMIN          | 1.030      | 1.028                    | 1.033                    | <.0001  |         |
|                                                                                              | Trt: High vs. Lo | 0.938      | 0.909                    | 0.968                    | <.0001  |         |

## Top models for PCT\_CHG\_40 predicting HOSP\_free\_days

| Model Variables                                                                              | Predictor        | Odds Ratio | OR 95% CI<br>Lower Bound | OR 95% CI<br>Upper Bound | p-value | AIC     |
|----------------------------------------------------------------------------------------------|------------------|------------|--------------------------|--------------------------|---------|---------|
| PCT_CHG_40 AGE SEX SOFA PLAT_COUNT<br>SEPSIS INR HAEMOGLOBIN ALBUMIN TRT                     | PCT_CHG_40       | 0.832      | 0.803                    | 0.861                    | <.0001  | 30972.5 |
|                                                                                              | AGE              | 0.995      | 0.994                    | 0.996                    | <.0001  |         |
|                                                                                              | Female vs. Male  | 1.108      | 1.072                    | 1.146                    | <.0001  |         |
|                                                                                              | SOFA             | 0.876      | 0.851                    | 0.902                    | <.0001  |         |
|                                                                                              | PLAT_COUNT       | 1.001      | 1.001                    | 1.001                    | <.0001  |         |
|                                                                                              | SEPSIS           | 0.851      | 0.824                    | 0.880                    | <.0001  |         |
|                                                                                              | INR              | 0.922      | 0.907                    | 0.937                    | <.0001  |         |
|                                                                                              | HAEMOGLOBIN      | 1.007      | 1.006                    | 1.007                    | <.0001  |         |
|                                                                                              | ALBUMIN          | 1.030      | 1.027                    | 1.032                    | <.0001  |         |
|                                                                                              | Trt: High vs. Lo | 0.937      | 0.908                    | 0.967                    | <.0001  |         |
| PCT_CHG_40 AGE SEX SOFA PLAT_COUNT<br>SEPSIS INR HAEMOGLOBIN<br>WHITE_CELL_COUNT ALBUMIN TRT | PCT_CHG_40       | 0.831      | 0.802                    | 0.860                    | <.0001  | 30973.9 |
|                                                                                              | AGE              | 0.995      | 0.994                    | 0.996                    | <.0001  |         |
|                                                                                              | Female vs. Male  | 1.108      | 1.072                    | 1.145                    | <.0001  |         |
|                                                                                              | SOFA             | 0.876      | 0.851                    | 0.902                    | <.0001  |         |
|                                                                                              | PLAT_COUNT       | 1.001      | 1.001                    | 1.001                    | <.0001  |         |
|                                                                                              | SEPSIS           | 0.850      | 0.823                    | 0.879                    | <.0001  |         |
|                                                                                              | INR              | 0.922      | 0.907                    | 0.937                    | <.0001  |         |
|                                                                                              | HAEMOGLOBIN      | 1.007      | 1.006                    | 1.007                    | <.0001  |         |
|                                                                                              | WHITE_CELL_COUNT | 1.000      | 0.999                    | 1.001                    | 0.4385  |         |
|                                                                                              | ALBUMIN          | 1.030      | 1.027                    | 1.032                    | <.0001  |         |
|                                                                                              | Trt: High vs. Lo | 0.937      | 0.908                    | 0.967                    | <.0001  |         |

## Top models for PCT\_CHG\_50 predicting HOSP\_free\_days

| Model Variables                                                                              | Predictor        | Odds Ratio | OR 95% CI<br>Lower Bound | OR 95% CI<br>Upper Bound | p-value | AIC     |
|----------------------------------------------------------------------------------------------|------------------|------------|--------------------------|--------------------------|---------|---------|
| PCT_CHG_50 AGE SEX SOFA PLAT_COUNT<br>SEPSIS INR HAEMOGLOBIN ALBUMIN TRT                     | PCT_CHG_50       | 0.783      | 0.754                    | 0.814                    | <.0001  | 30921.0 |
|                                                                                              | AGE              | 0.995      | 0.994                    | 0.996                    | <.0001  |         |
|                                                                                              | Female vs. Male  | 1.105      | 1.069                    | 1.143                    | <.0001  |         |
|                                                                                              | SOFA             | 0.876      | 0.851                    | 0.902                    | <.0001  |         |
|                                                                                              | PLAT_COUNT       | 1.001      | 1.001                    | 1.001                    | <.0001  |         |
|                                                                                              | SEPSIS           | 0.852      | 0.825                    | 0.881                    | <.0001  |         |
|                                                                                              | INR              | 0.925      | 0.910                    | 0.940                    | <.0001  |         |
|                                                                                              | HAEMOGLOBIN      | 1.007      | 1.006                    | 1.007                    | <.0001  |         |
|                                                                                              | ALBUMIN          | 1.030      | 1.027                    | 1.032                    | <.0001  |         |
|                                                                                              | Trt: High vs. Lo | 0.946      | 0.917                    | 0.976                    | 0.0006  |         |
| PCT_CHG_50 AGE SEX SOFA PLAT_COUNT<br>SEPSIS INR HAEMOGLOBIN<br>WHITE_CELL_COUNT ALBUMIN TRT | PCT_CHG_50       | 0.782      | 0.753                    | 0.812                    | <.0001  | 30921.8 |
|                                                                                              | AGE              | 0.995      | 0.994                    | 0.996                    | <.0001  |         |
|                                                                                              | Female vs. Male  | 1.105      | 1.069                    | 1.142                    | <.0001  |         |
|                                                                                              | SOFA             | 0.875      | 0.850                    | 0.901                    | <.0001  |         |
|                                                                                              | PLAT_COUNT       | 1.001      | 1.001                    | 1.001                    | <.0001  |         |
|                                                                                              | SEPSIS           | 0.851      | 0.823                    | 0.879                    | <.0001  |         |
|                                                                                              | INR              | 0.925      | 0.910                    | 0.940                    | <.0001  |         |
|                                                                                              | HAEMOGLOBIN      | 1.007      | 1.006                    | 1.007                    | <.0001  |         |
|                                                                                              | WHITE_CELL_COUNT | 1.001      | 1.000                    | 1.002                    | 0.2854  |         |
|                                                                                              | ALBUMIN          | 1.030      | 1.027                    | 1.032                    | <.0001  |         |
|                                                                                              | Trt: High vs. Lo | 0.946      | 0.917                    | 0.977                    | 0.0006  |         |



## Top models for PCT\_CHG\_60 predicting HOSP\_free\_days

| Model Variables                                                                              | Predictor        | Odds Ratio | OR 95% CI<br>Lower Bound | OR 95% CI<br>Upper Bound | p-value | AIC     |
|----------------------------------------------------------------------------------------------|------------------|------------|--------------------------|--------------------------|---------|---------|
| PCT_CHG_60 AGE SEX SOFA PLAT_COUNT<br>SEPSIS INR HAEMOGLOBIN ALBUMIN TRT                     | PCT_CHG_60       | 0.855      | 0.818                    | 0.894                    | <.0001  | 31032.3 |
|                                                                                              | AGE              | 0.995      | 0.994                    | 0.996                    | <.0001  |         |
|                                                                                              | Female vs. Male  | 1.102      | 1.066                    | 1.139                    | <.0001  |         |
|                                                                                              | SOFA             | 0.861      | 0.837                    | 0.887                    | <.0001  |         |
|                                                                                              | PLAT_COUNT       | 1.001      | 1.000                    | 1.001                    | <.0001  |         |
|                                                                                              | SEPSIS           | 0.844      | 0.817                    | 0.872                    | <.0001  |         |
|                                                                                              | INR              | 0.920      | 0.905                    | 0.935                    | <.0001  |         |
|                                                                                              | HAEMOGLOBIN      | 1.006      | 1.005                    | 1.007                    | <.0001  |         |
|                                                                                              | ALBUMIN          | 1.029      | 1.027                    | 1.032                    | <.0001  |         |
|                                                                                              | Trt: High vs. Lo | 0.943      | 0.914                    | 0.973                    | 0.0002  |         |
|                                                                                              |                  |            |                          |                          |         |         |
| PCT_CHG_60 AGE SEX SOFA PLAT_COUNT<br>SEPSIS INR HAEMOGLOBIN<br>WHITE_CELL_COUNT ALBUMIN TRT | PCT_CHG_60       | 0.855      | 0.817                    | 0.893                    | <.0001  | 31034.0 |
|                                                                                              | AGE              | 0.995      | 0.994                    | 0.996                    | <.0001  |         |
|                                                                                              | Female vs. Male  | 1.102      | 1.066                    | 1.139                    | <.0001  |         |
|                                                                                              | SOFA             | 0.861      | 0.836                    | 0.886                    | <.0001  |         |
|                                                                                              | PLAT_COUNT       | 1.001      | 1.000                    | 1.001                    | <.0001  |         |
|                                                                                              | SEPSIS           | 0.843      | 0.816                    | 0.872                    | <.0001  |         |
|                                                                                              | INR              | 0.920      | 0.906                    | 0.935                    | <.0001  |         |
|                                                                                              | HAEMOGLOBIN      | 1.006      | 1.005                    | 1.007                    | <.0001  |         |
|                                                                                              | WHITE_CELL_COUNT | 1.000      | 0.999                    | 1.001                    | 0.5521  |         |
|                                                                                              | ALBUMIN          | 1.029      | 1.027                    | 1.032                    | <.0001  |         |
|                                                                                              | Trt: High vs. Lo | 0.943      | 0.914                    | 0.973                    | 0.0002  |         |
|                                                                                              |                  |            |                          |                          |         |         |

## Top models for NADIR\_GE100 predicting HOSP\_free\_days

| Model Variables                                                                    | Predictor        | Odds Ratio | OR 95% CI<br>Lower Bound | OR 95% CI<br>Upper Bound | p-value | AIC     |
|------------------------------------------------------------------------------------|------------------|------------|--------------------------|--------------------------|---------|---------|
| NADIR_GE100 AGE SEX SOFA SEPSIS INR<br>HAEMOGLOBIN ALBUMIN TRT                     | NADIR_GE100      | 1.390      | 1.343                    | 1.439                    | <.0001  | 30804.3 |
|                                                                                    | AGE              | 0.994      | 0.993                    | 0.995                    | <.0001  |         |
|                                                                                    | Female vs. Male  | 1.109      | 1.073                    | 1.146                    | <.0001  |         |
|                                                                                    | SOFA             | 0.902      | 0.877                    | 0.928                    | <.0001  |         |
|                                                                                    | SEPSIS           | 0.855      | 0.828                    | 0.883                    | <.0001  |         |
|                                                                                    | INR              | 0.925      | 0.911                    | 0.940                    | <.0001  |         |
|                                                                                    | HAEMOGLOBIN      | 1.006      | 1.005                    | 1.007                    | <.0001  |         |
|                                                                                    | ALBUMIN          | 1.030      | 1.027                    | 1.032                    | <.0001  |         |
|                                                                                    | Trt: High vs. Lo | 0.925      | 0.896                    | 0.954                    | <.0001  |         |
| NADIR_GE100 AGE SEX SOFA PLAT_COUNT<br>SEPSIS INR HAEMOGLOBIN ALBUMIN TRT          | NADIR_GE100      | 1.402      | 1.347                    | 1.459                    | <.0001  | 30805.6 |
|                                                                                    | AGE              | 0.994      | 0.993                    | 0.995                    | <.0001  |         |
|                                                                                    | Female vs. Male  | 1.109      | 1.073                    | 1.147                    | <.0001  |         |
|                                                                                    | SOFA             | 0.900      | 0.874                    | 0.927                    | <.0001  |         |
|                                                                                    | PLAT_COUNT       | 1.000      | 1.000                    | 1.000                    | 0.4062  |         |
|                                                                                    | SEPSIS           | 0.857      | 0.829                    | 0.885                    | <.0001  |         |
|                                                                                    | INR              | 0.926      | 0.911                    | 0.941                    | <.0001  |         |
|                                                                                    | HAEMOGLOBIN      | 1.006      | 1.005                    | 1.007                    | <.0001  |         |
|                                                                                    | ALBUMIN          | 1.030      | 1.027                    | 1.032                    | <.0001  |         |
|                                                                                    | Trt: High vs. Lo | 0.925      | 0.896                    | 0.954                    | <.0001  |         |
| NADIR_GE100 AGE SEX SOFA SEPSIS INR<br>HAEMOGLOBIN WHITE_CELL_COUNT<br>ALBUMIN TRT | NADIR_GE100      | 1.390      | 1.342                    | 1.439                    | <.0001  | 30806.0 |
|                                                                                    | AGE              | 0.994      | 0.993                    | 0.995                    | <.0001  |         |
|                                                                                    | Female vs. Male  | 1.108      | 1.072                    | 1.146                    | <.0001  |         |
|                                                                                    | SOFA             | 0.902      | 0.877                    | 0.928                    | <.0001  |         |
|                                                                                    | SEPSIS           | 0.854      | 0.827                    | 0.883                    | <.0001  |         |
|                                                                                    | INR              | 0.925      | 0.911                    | 0.941                    | <.0001  |         |
|                                                                                    | HAEMOGLOBIN      | 1.006      | 1.005                    | 1.007                    | <.0001  |         |
|                                                                                    | WHITE_CELL_COUNT | 1.000      | 0.999                    | 1.001                    | 0.5839  |         |
|                                                                                    | ALBUMIN          | 1.030      | 1.027                    | 1.032                    | <.0001  |         |
|                                                                                    | Trt: High vs. Lo | 0.925      | 0.896                    | 0.955                    | <.0001  |         |

## Top models for PCT\_CHG\_30 predicting ICU\_free\_days

| Model Variables                                                                              | Predictor        | Odds Ratio | OR 95% CI<br>Lower Bound | OR 95% CI<br>Upper Bound | p-value | AIC     |
|----------------------------------------------------------------------------------------------|------------------|------------|--------------------------|--------------------------|---------|---------|
| PCT_CHG_30 AGE SEX SOFA PLAT_COUNT<br>SEPSIS INR HAEMOGLOBIN<br>WHITE_CELL_COUNT ALBUMIN TRT | PCT_CHG_30       | 0.822      | 0.790                    | 0.856                    | <.0001  | 26365.6 |
|                                                                                              | AGE              | 1.003      | 1.002                    | 1.004                    | <.0001  |         |
|                                                                                              | Female vs. Male  | 1.101      | 1.058                    | 1.147                    | <.0001  |         |
|                                                                                              | SOFA             | 0.722      | 0.698                    | 0.747                    | <.0001  |         |
|                                                                                              | PLAT_COUNT       | 1.001      | 1.001                    | 1.001                    | <.0001  |         |
|                                                                                              | SEPSIS           | 0.894      | 0.860                    | 0.931                    | <.0001  |         |
|                                                                                              | INR              | 0.977      | 0.959                    | 0.996                    | 0.0198  |         |
|                                                                                              | HAEMOGLOBIN      | 1.007      | 1.006                    | 1.008                    | <.0001  |         |
|                                                                                              | WHITE_CELL_COUNT | 0.998      | 0.997                    | 0.999                    | 0.0023  |         |
|                                                                                              | ALBUMIN          | 1.015      | 1.012                    | 1.018                    | <.0001  |         |
|                                                                                              | Trt: High vs. Lo | 0.937      | 0.903                    | 0.974                    | 0.0008  |         |

## Top models for PCT\_CHG\_40 predicting ICU\_free\_days

| Model Variables                                                                              | Predictor        | Odds Ratio | OR 95% CI<br>Lower Bound | OR 95% CI<br>Upper Bound | p-value | AIC     |
|----------------------------------------------------------------------------------------------|------------------|------------|--------------------------|--------------------------|---------|---------|
| PCT_CHG_40 AGE SEX SOFA PLAT_COUNT<br>SEPSIS INR HAEMOGLOBIN<br>WHITE_CELL_COUNT ALBUMIN TRT | PCT_CHG_40       | 0.757      | 0.727                    | 0.789                    | <.0001  | 26284.5 |
|                                                                                              | AGE              | 1.003      | 1.002                    | 1.004                    | <.0001  |         |
|                                                                                              | Female vs. Male  | 1.114      | 1.070                    | 1.160                    | <.0001  |         |
|                                                                                              | SOFA             | 0.731      | 0.707                    | 0.757                    | <.0001  |         |
|                                                                                              | PLAT_COUNT       | 1.001      | 1.001                    | 1.001                    | <.0001  |         |
|                                                                                              | SEPSIS           | 0.901      | 0.866                    | 0.937                    | <.0001  |         |
|                                                                                              | INR              | 0.980      | 0.961                    | 0.999                    | 0.0414  |         |
|                                                                                              | HAEMOGLOBIN      | 1.007      | 1.006                    | 1.008                    | <.0001  |         |
|                                                                                              | WHITE_CELL_COUNT | 0.998      | 0.997                    | 0.999                    | 0.0029  |         |
|                                                                                              | ALBUMIN          | 1.014      | 1.011                    | 1.017                    | <.0001  |         |
|                                                                                              | Trt: High vs. Lo | 0.928      | 0.894                    | 0.964                    | 0.0001  |         |

## Top models for PCT\_CHG\_50 predicting ICU\_free\_days

| Model Variables                                                                              | Predictor        | Odds Ratio | OR 95% CI<br>Lower Bound | OR 95% CI<br>Upper Bound | p-value | AIC     |
|----------------------------------------------------------------------------------------------|------------------|------------|--------------------------|--------------------------|---------|---------|
| PCT_CHG_50 AGE SEX SOFA PLAT_COUNT<br>SEPSIS HAEMOGLOBIN<br>WHITE_CELL_COUNT ALBUMIN TRT     | PCT_CHG_50       | 0.681      | 0.652                    | 0.712                    | <.0001  | 26175.3 |
|                                                                                              | AGE              | 1.003      | 1.001                    | 1.004                    | <.0001  |         |
|                                                                                              | Female vs. Male  | 1.111      | 1.067                    | 1.156                    | <.0001  |         |
|                                                                                              | SOFA             | 0.732      | 0.707                    | 0.757                    | <.0001  |         |
|                                                                                              | PLAT_COUNT       | 1.001      | 1.001                    | 1.001                    | <.0001  |         |
|                                                                                              | SEPSIS           | 0.903      | 0.868                    | 0.939                    | <.0001  |         |
|                                                                                              | HAEMOGLOBIN      | 1.007      | 1.006                    | 1.008                    | <.0001  |         |
|                                                                                              | WHITE_CELL_COUNT | 0.999      | 0.997                    | 1.000                    | 0.0131  |         |
|                                                                                              | ALBUMIN          | 1.014      | 1.011                    | 1.017                    | <.0001  |         |
|                                                                                              | Trt: High vs. Lo | 0.942      | 0.907                    | 0.978                    | 0.0020  |         |
| PCT_CHG_50 AGE SEX SOFA PLAT_COUNT<br>SEPSIS INR HAEMOGLOBIN<br>WHITE_CELL_COUNT ALBUMIN TRT | PCT_CHG_50       | 0.684      | 0.654                    | 0.715                    | <.0001  | 26175.6 |
|                                                                                              | AGE              | 1.003      | 1.001                    | 1.004                    | <.0001  |         |
|                                                                                              | Female vs. Male  | 1.113      | 1.070                    | 1.159                    | <.0001  |         |
|                                                                                              | SOFA             | 0.732      | 0.708                    | 0.757                    | <.0001  |         |
|                                                                                              | PLAT_COUNT       | 1.001      | 1.001                    | 1.001                    | <.0001  |         |
|                                                                                              | SEPSIS           | 0.903      | 0.868                    | 0.940                    | <.0001  |         |
|                                                                                              | INR              | 0.987      | 0.968                    | 1.006                    | 0.1905  |         |
|                                                                                              | HAEMOGLOBIN      | 1.007      | 1.006                    | 1.008                    | <.0001  |         |
|                                                                                              | WHITE_CELL_COUNT | 0.999      | 0.997                    | 1.000                    | 0.0122  |         |
|                                                                                              | ALBUMIN          | 1.014      | 1.011                    | 1.017                    | <.0001  |         |
|                                                                                              | Trt: High vs. Lo | 0.941      | 0.906                    | 0.977                    | 0.0017  |         |

## Top models for PCT\_CHG\_60 predicting ICU\_free\_days

| Model Variables                                                                              | Predictor        | Odds Ratio | OR 95% CI<br>Lower Bound | OR 95% CI<br>Upper Bound | p-value | AIC     |
|----------------------------------------------------------------------------------------------|------------------|------------|--------------------------|--------------------------|---------|---------|
| PCT_CHG_60 AGE SEX SOFA PLAT_COUNT<br>SEPSIS INR HAEMOGLOBIN<br>WHITE_CELL_COUNT ALBUMIN TRT | PCT_CHG_60       | 0.715      | 0.680                    | 0.752                    | <.0001  | 26292.2 |
|                                                                                              | AGE              | 1.003      | 1.002                    | 1.004                    | <.0001  |         |
|                                                                                              | Female vs. Male  | 1.113      | 1.069                    | 1.159                    | <.0001  |         |
|                                                                                              | SOFA             | 0.714      | 0.690                    | 0.738                    | <.0001  |         |
|                                                                                              | PLAT_COUNT       | 1.001      | 1.001                    | 1.001                    | <.0001  |         |
|                                                                                              | SEPSIS           | 0.904      | 0.869                    | 0.941                    | <.0001  |         |
|                                                                                              | INR              | 0.981      | 0.962                    | 1.000                    | 0.0522  |         |
|                                                                                              | HAEMOGLOBIN      | 1.007      | 1.006                    | 1.008                    | <.0001  |         |
|                                                                                              | WHITE_CELL_COUNT | 0.998      | 0.997                    | 0.999                    | 0.0040  |         |
|                                                                                              | ALBUMIN          | 1.014      | 1.011                    | 1.017                    | <.0001  |         |
|                                                                                              | Trt: High vs. Lo | 0.939      | 0.904                    | 0.975                    | 0.0011  |         |
| PCT_CHG_60 AGE SEX SOFA PLAT_COUNT<br>SEPSIS HAEMOGLOBIN<br>WHITE_CELL_COUNT ALBUMIN TRT     | PCT_CHG_60       | 0.711      | 0.676                    | 0.748                    | <.0001  | 26293.9 |
|                                                                                              | AGE              | 1.003      | 1.002                    | 1.004                    | <.0001  |         |
|                                                                                              | Female vs. Male  | 1.109      | 1.066                    | 1.155                    | <.0001  |         |
|                                                                                              | SOFA             | 0.712      | 0.689                    | 0.737                    | <.0001  |         |
|                                                                                              | PLAT_COUNT       | 1.001      | 1.001                    | 1.001                    | <.0001  |         |
|                                                                                              | SEPSIS           | 0.904      | 0.869                    | 0.940                    | <.0001  |         |
|                                                                                              | HAEMOGLOBIN      | 1.006      | 1.005                    | 1.007                    | <.0001  |         |
|                                                                                              | WHITE_CELL_COUNT | 0.998      | 0.997                    | 0.999                    | 0.0045  |         |
|                                                                                              | ALBUMIN          | 1.014      | 1.011                    | 1.016                    | <.0001  |         |
|                                                                                              | Trt: High vs. Lo | 0.940      | 0.905                    | 0.976                    | 0.0014  |         |

## Top models for NADIR\_GE100 predicting ICU\_free\_days

| Model Variables                                                                               | Predictor        | Odds Ratio | OR 95% CI<br>Lower Bound | OR 95% CI<br>Upper Bound | p-value | AIC     |
|-----------------------------------------------------------------------------------------------|------------------|------------|--------------------------|--------------------------|---------|---------|
| NADIR_GE100 AGE SEX SOFA SEPSIS INR<br>HAEMOGLOBIN WHITE_CELL_COUNT<br>ALBUMIN TRT            | NADIR_GE100      | 1.490      | 1.429                    | 1.554                    | <.0001  | 26210.7 |
|                                                                                               | AGE              | 1.002      | 1.001                    | 1.003                    | 0.0016  |         |
|                                                                                               | Female vs. Male  | 1.112      | 1.068                    | 1.157                    | <.0001  |         |
|                                                                                               | SOFA             | 0.748      | 0.723                    | 0.774                    | <.0001  |         |
|                                                                                               | SEPSIS           | 0.905      | 0.870                    | 0.941                    | <.0001  |         |
|                                                                                               | INR              | 0.983      | 0.964                    | 1.002                    | 0.0752  |         |
|                                                                                               | HAEMOGLOBIN      | 1.006      | 1.005                    | 1.007                    | <.0001  |         |
|                                                                                               | WHITE_CELL_COUNT | 0.998      | 0.997                    | 0.999                    | 0.0015  |         |
|                                                                                               | ALBUMIN          | 1.015      | 1.012                    | 1.018                    | <.0001  |         |
|                                                                                               | Trt: High vs. Lo | 0.927      | 0.892                    | 0.962                    | <.0001  |         |
| NADIR_GE100 AGE SEX SOFA SEPSIS<br>HAEMOGLOBIN WHITE_CELL_COUNT<br>ALBUMIN TRT                | NADIR_GE100      | 1.494      | 1.433                    | 1.558                    | <.0001  | 26211.8 |
|                                                                                               | AGE              | 1.002      | 1.001                    | 1.003                    | 0.0014  |         |
|                                                                                               | Female vs. Male  | 1.108      | 1.065                    | 1.153                    | <.0001  |         |
|                                                                                               | SOFA             | 0.748      | 0.723                    | 0.773                    | <.0001  |         |
|                                                                                               | SEPSIS           | 0.905      | 0.870                    | 0.941                    | <.0001  |         |
|                                                                                               | HAEMOGLOBIN      | 1.006      | 1.005                    | 1.007                    | <.0001  |         |
|                                                                                               | WHITE_CELL_COUNT | 0.998      | 0.997                    | 0.999                    | 0.0015  |         |
|                                                                                               | ALBUMIN          | 1.015      | 1.012                    | 1.017                    | <.0001  |         |
|                                                                                               | Trt: High vs. Lo | 0.928      | 0.893                    | 0.963                    | 0.0001  |         |
| NADIR_GE100 AGE SEX SOFA PLAT_COUNT<br>SEPSIS INR HAEMOGLOBIN<br>WHITE_CELL_COUNT ALBUMIN TRT | NADIR_GE100      | 1.477      | 1.407                    | 1.551                    | <.0001  | 26212.3 |
|                                                                                               | AGE              | 1.002      | 1.001                    | 1.003                    | 0.0015  |         |
|                                                                                               | Female vs. Male  | 1.111      | 1.067                    | 1.156                    | <.0001  |         |
|                                                                                               | SOFA             | 0.750      | 0.724                    | 0.776                    | <.0001  |         |
|                                                                                               | PLAT_COUNT       | 1.000      | 1.000                    | 1.000                    | 0.4923  |         |
|                                                                                               | SEPSIS           | 0.904      | 0.869                    | 0.941                    | <.0001  |         |
|                                                                                               | INR              | 0.982      | 0.964                    | 1.001                    | 0.0675  |         |
|                                                                                               | HAEMOGLOBIN      | 1.006      | 1.005                    | 1.007                    | <.0001  |         |
|                                                                                               | WHITE_CELL_COUNT | 0.998      | 0.997                    | 0.999                    | 0.0012  |         |
|                                                                                               | ALBUMIN          | 1.015      | 1.012                    | 1.018                    | <.0001  |         |
|                                                                                               | Trt: High vs. Lo | 0.926      | 0.892                    | 0.962                    | <.0001  |         |

| Model Variables                                      | Predictor        | Odds Ratio | OR 95% CI<br>Lower Bound | OR 95% CI<br>Upper Bound | p-value | AIC    |
|------------------------------------------------------|------------------|------------|--------------------------|--------------------------|---------|--------|
| PCT_CHG_30 SEX PLAT_COUNT SEPSIS<br>HAEMOGLOBIN      | PCT_CHG_30       | 1.187      | 0.607                    | 2.325                    | 0.6164  | 303.53 |
|                                                      | Female vs. Male  | 0.508      | 0.233                    | 1.108                    | 0.0892  |        |
|                                                      | PLAT_COUNT       | 1.002      | 1.000                    | 1.004                    | 0.0410  |        |
|                                                      | SEPSIS           | 0.369      | 0.175                    | 0.780                    | 0.0093  |        |
|                                                      | HAEMOGLOBIN      | 0.986      | 0.970                    | 1.003                    | 0.1155  |        |
| PCT_CHG_30 SEX SOFA PLAT_COUNT<br>SEPSIS HAEMOGLOBIN | PCT_CHG_30       | 1.267      | 0.642                    | 2.502                    | 0.4952  | 304.21 |
|                                                      | Female vs. Male  | 0.511      | 0.234                    | 1.113                    | 0.0912  |        |
|                                                      | SOFA             | 0.703      | 0.382                    | 1.294                    | 0.2578  |        |
|                                                      | PLAT_COUNT       | 1.002      | 0.999                    | 1.004                    | 0.1308  |        |
|                                                      | SEPSIS           | 0.388      | 0.182                    | 0.826                    | 0.0142  |        |
|                                                      | HAEMOGLOBIN      | 0.986      | 0.970                    | 1.003                    | 0.1088  |        |
| PCT_CHG_30 SEX PLAT_COUNT SEPSIS                     | PCT_CHG_30       | 1.062      | 0.548                    | 2.058                    | 0.8577  | 304.24 |
|                                                      | Female vs. Male  | 0.514      | 0.237                    | 1.114                    | 0.0923  |        |
|                                                      | PLAT_COUNT       | 1.002      | 1.000                    | 1.004                    | 0.0341  |        |
|                                                      | SEPSIS           | 0.356      | 0.169                    | 0.747                    | 0.0065  |        |
| PCT_CHG_30 SEX SOFA SEPSIS<br>HAEMOGLOBIN            | PCT_CHG_30       | 1.396      | 0.720                    | 2.708                    | 0.3241  | 304.31 |
|                                                      | Female vs. Male  | 0.537      | 0.248                    | 1.160                    | 0.1140  |        |
|                                                      | SOFA             | 0.601      | 0.334                    | 1.080                    | 0.0890  |        |
|                                                      | SEPSIS           | 0.424      | 0.201                    | 0.894                    | 0.0245  |        |
|                                                      | HAEMOGLOBIN      | 0.986      | 0.969                    | 1.003                    | 0.0991  |        |
| PCT_CHG_30 SEX PLAT_COUNT SEPSIS<br>HAEMOGLOBIN TRT  | PCT_CHG_30       | 1.202      | 0.612                    | 2.358                    | 0.5933  | 304.48 |
|                                                      | Female vs. Male  | 0.514      | 0.236                    | 1.122                    | 0.0954  |        |
|                                                      | PLAT_COUNT       | 1.002      | 1.000                    | 1.004                    | 0.0532  |        |
|                                                      | SEPSIS           | 0.365      | 0.173                    | 0.771                    | 0.0084  |        |
|                                                      | HAEMOGLOBIN      | 0.987      | 0.970                    | 1.004                    | 0.1263  |        |
|                                                      | Trt: High vs. Lo | 1.407      | 0.730                    | 2.713                    | 0.3082  |        |
| PCT_CHG_30 PLAT_COUNT SEPSIS<br>HAEMOGLOBIN          | PCT_CHG_30       | 1.122      | 0.574                    | 2.195                    | 0.7363  | 304.73 |
|                                                      | PLAT_COUNT       | 1.002      | 1.000                    | 1.004                    | 0.0609  |        |
|                                                      | SEPSIS           | 0.358      | 0.171                    | 0.753                    | 0.0069  |        |
|                                                      | HAEMOGLOBIN      | 0.987      | 0.970                    | 1.004                    | 0.1198  |        |



| Model Variables                                       | Predictor        | Odds Ratio | OR 95% CI<br>Lower Bound | OR 95% CI<br>Upper Bound | p-value | AIC    |
|-------------------------------------------------------|------------------|------------|--------------------------|--------------------------|---------|--------|
| PCT_CHG_30 SEX SOFA PLAT_COUNT SEPSIS                 | PCT_CHG_30       | 1.128      | 0.578                    | 2.203                    | 0.7243  | 305.02 |
|                                                       | Female vs. Male  | 0.512      | 0.236                    | 1.110                    | 0.0903  |        |
|                                                       | SOFA             | 0.717      | 0.395                    | 1.304                    | 0.2767  |        |
|                                                       | PLAT_COUNT       | 1.002      | 1.000                    | 1.004                    | 0.1139  |        |
|                                                       | SEPSIS           | 0.371      | 0.175                    | 0.786                    | 0.0098  |        |
| PCT_CHG_30 SEX PLAT_COUNT SEPSIS TRT                  | PCT_CHG_30       | 1.077      | 0.555                    | 2.091                    | 0.8270  | 305.03 |
|                                                       | Female vs. Male  | 0.520      | 0.240                    | 1.127                    | 0.0978  |        |
|                                                       | PLAT_COUNT       | 1.002      | 1.000                    | 1.004                    | 0.0413  |        |
|                                                       | SEPSIS           | 0.351      | 0.167                    | 0.739                    | 0.0060  |        |
|                                                       | Trt: High vs. Lo | 1.440      | 0.749                    | 2.766                    | 0.2746  |        |
| PCT_CHG_30 SOFA SEPSIS HAEMOGLOBIN                    | PCT_CHG_30       | 1.329      | 0.688                    | 2.565                    | 0.3974  | 305.05 |
|                                                       | SOFA             | 0.614      | 0.347                    | 1.086                    | 0.0940  |        |
|                                                       | SEPSIS           | 0.403      | 0.192                    | 0.846                    | 0.0166  |        |
|                                                       | HAEMOGLOBIN      | 0.985      | 0.969                    | 1.002                    | 0.0936  |        |
| PCT_CHG_30 SEX SOFA SEPSIS HAEMOGLOBIN TRT            | PCT_CHG_30       | 1.419      | 0.730                    | 2.760                    | 0.3024  | 305.13 |
|                                                       | Female vs. Male  | 0.542      | 0.250                    | 1.171                    | 0.1196  |        |
|                                                       | SOFA             | 0.613      | 0.341                    | 1.103                    | 0.1032  |        |
|                                                       | SEPSIS           | 0.414      | 0.196                    | 0.876                    | 0.0214  |        |
|                                                       | HAEMOGLOBIN      | 0.986      | 0.969                    | 1.003                    | 0.1002  |        |
|                                                       | Trt: High vs. Lo | 1.437      | 0.746                    | 2.768                    | 0.2787  |        |
| PCT_CHG_30 SEX SOFA PLAT_COUNT SEPSIS HAEMOGLOBIN TRT | PCT_CHG_30       | 1.286      | 0.649                    | 2.549                    | 0.4710  | 305.18 |
|                                                       | Female vs. Male  | 0.517      | 0.237                    | 1.127                    | 0.0973  |        |
|                                                       | SOFA             | 0.705      | 0.384                    | 1.295                    | 0.2604  |        |
|                                                       | PLAT_COUNT       | 1.002      | 0.999                    | 1.004                    | 0.1466  |        |
|                                                       | SEPSIS           | 0.383      | 0.180                    | 0.815                    | 0.0130  |        |
|                                                       | HAEMOGLOBIN      | 0.986      | 0.970                    | 1.003                    | 0.1161  |        |
|                                                       | Trt: High vs. Lo | 1.404      | 0.728                    | 2.706                    | 0.3114  |        |
| PCT_CHG_30 SEX PLAT_COUNT SEPSIS HAEMOGLOBIN ALBUMIN  | PCT_CHG_30       | 1.174      | 0.599                    | 2.300                    | 0.6408  | 305.23 |
|                                                       | Female vs. Male  | 0.509      | 0.234                    | 1.110                    | 0.0899  |        |
|                                                       | PLAT_COUNT       | 1.002      | 1.000                    | 1.004                    | 0.0424  |        |
|                                                       | SEPSIS           | 0.387      | 0.180                    | 0.831                    | 0.0152  |        |
|                                                       | HAEMOGLOBIN      | 0.986      | 0.969                    | 1.003                    | 0.0992  |        |
|                                                       | ALBUMIN          | 1.014      | 0.967                    | 1.063                    | 0.5785  |        |

| Model Variables                                                  | Predictor        | Odds Ratio | OR 95% CI<br>Lower Bound | OR 95% CI<br>Upper Bound | p-value | AIC    |
|------------------------------------------------------------------|------------------|------------|--------------------------|--------------------------|---------|--------|
| PCT_CHG_30 SEX PLAT_COUNT SEPSIS<br>HAEMOGLOBIN WHITE_CELL_COUNT | PCT_CHG_30       | 1.210      | 0.616                    | 2.379                    | 0.5805  | 305.29 |
|                                                                  | Female vs. Male  | 0.506      | 0.232                    | 1.105                    | 0.0877  |        |
|                                                                  | PLAT_COUNT       | 1.002      | 1.000                    | 1.005                    | 0.0370  |        |
|                                                                  | SEPSIS           | 0.378      | 0.178                    | 0.801                    | 0.0113  |        |
|                                                                  | HAEMOGLOBIN      | 0.987      | 0.970                    | 1.004                    | 0.1249  |        |
|                                                                  | WHITE_CELL_COUNT | 0.991      | 0.954                    | 1.030                    | 0.6446  |        |
| PCT_CHG_30 SEX SOFA SEPSIS                                       | PCT_CHG_30       | 1.242      | 0.647                    | 2.385                    | 0.5151  | 305.30 |
|                                                                  | Female vs. Male  | 0.533      | 0.247                    | 1.149                    | 0.1087  |        |
|                                                                  | SOFA             | 0.611      | 0.344                    | 1.084                    | 0.0923  |        |
|                                                                  | SEPSIS           | 0.404      | 0.192                    | 0.848                    | 0.0169  |        |
| PCT_CHG_30 SEX SEPSIS HAEMOGLOBIN                                | PCT_CHG_30       | 1.318      | 0.684                    | 2.542                    | 0.4098  | 305.32 |
|                                                                  | Female vs. Male  | 0.544      | 0.253                    | 1.171                    | 0.1202  |        |
|                                                                  | SEPSIS           | 0.396      | 0.189                    | 0.830                    | 0.0144  |        |
|                                                                  | HAEMOGLOBIN      | 0.986      | 0.969                    | 1.003                    | 0.1026  |        |
| PCT_CHG_30 SOFA PLAT_COUNT SEPSIS<br>HAEMOGLOBIN                 | PCT_CHG_30       | 1.199      | 0.608                    | 2.366                    | 0.6003  | 305.36 |
|                                                                  | SOFA             | 0.705      | 0.388                    | 1.279                    | 0.2499  |        |
|                                                                  | PLAT_COUNT       | 1.002      | 0.999                    | 1.004                    | 0.1782  |        |
|                                                                  | SEPSIS           | 0.376      | 0.178                    | 0.795                    | 0.0107  |        |
|                                                                  | HAEMOGLOBIN      | 0.986      | 0.969                    | 1.003                    | 0.1073  |        |
| PCT_CHG_30 PLAT_COUNT SEPSIS                                     | PCT_CHG_30       | 1.009      | 0.521                    | 1.955                    | 0.9785  | 305.37 |
|                                                                  | PLAT_COUNT       | 1.002      | 1.000                    | 1.004                    | 0.0484  |        |
|                                                                  | SEPSIS           | 0.349      | 0.167                    | 0.730                    | 0.0054  |        |
| PCT_CHG_30 AGE SEX PLAT_COUNT SEPSIS<br>HAEMOGLOBIN              | PCT_CHG_30       | 1.176      | 0.598                    | 2.314                    | 0.6387  | 305.48 |
|                                                                  | AGE              | 0.998      | 0.977                    | 1.018                    | 0.8102  |        |
|                                                                  | Female vs. Male  | 0.506      | 0.232                    | 1.104                    | 0.0874  |        |
|                                                                  | PLAT_COUNT       | 1.002      | 1.000                    | 1.004                    | 0.0404  |        |
|                                                                  | SEPSIS           | 0.369      | 0.175                    | 0.779                    | 0.0091  |        |
|                                                                  | HAEMOGLOBIN      | 0.987      | 0.970                    | 1.003                    | 0.1146  |        |
| PCT_CHG_30 SEX PLAT_COUNT SEPSIS INR<br>HAEMOGLOBIN              | PCT_CHG_30       | 1.175      | 0.596                    | 2.319                    | 0.6414  | 305.49 |
|                                                                  | Female vs. Male  | 0.503      | 0.229                    | 1.105                    | 0.0874  |        |
|                                                                  | PLAT_COUNT       | 1.002      | 1.000                    | 1.004                    | 0.0408  |        |
|                                                                  | SEPSIS           | 0.369      | 0.175                    | 0.780                    | 0.0092  |        |
|                                                                  | INR              | 1.036      | 0.748                    | 1.435                    | 0.8324  |        |
|                                                                  | HAEMOGLOBIN      | 0.986      | 0.970                    | 1.003                    | 0.1137  |        |

| Model Variables                                     | Predictor        | Odds Ratio | OR 95% CI<br>Lower Bound | OR 95% CI<br>Upper Bound | p-value | AIC    |
|-----------------------------------------------------|------------------|------------|--------------------------|--------------------------|---------|--------|
| PCT_CHG_40 SEX PLAT_COUNT SEPSIS                    | PCT_CHG_40       | 0.547      | 0.249                    | 1.205                    | 0.1349  | 301.83 |
|                                                     | Female vs. Male  | 0.549      | 0.254                    | 1.190                    | 0.1291  |        |
|                                                     | PLAT_COUNT       | 1.003      | 1.001                    | 1.005                    | 0.0157  |        |
|                                                     | SEPSIS           | 0.369      | 0.175                    | 0.780                    | 0.0092  |        |
| PCT_CHG_40 SEX PLAT_COUNT SEPSIS<br>HAEMOGLOBIN     | PCT_CHG_40       | 0.599      | 0.269                    | 1.335                    | 0.2105  | 302.10 |
|                                                     | Female vs. Male  | 0.549      | 0.253                    | 1.196                    | 0.1315  |        |
|                                                     | PLAT_COUNT       | 1.003      | 1.000                    | 1.005                    | 0.0179  |        |
|                                                     | SEPSIS           | 0.380      | 0.179                    | 0.806                    | 0.0119  |        |
|                                                     | HAEMOGLOBIN      | 0.989      | 0.972                    | 1.006                    | 0.2037  |        |
| PCT_CHG_40 PLAT_COUNT SEPSIS                        | PCT_CHG_40       | 0.514      | 0.234                    | 1.129                    | 0.0979  | 302.35 |
|                                                     | PLAT_COUNT       | 1.003      | 1.000                    | 1.005                    | 0.0202  |        |
|                                                     | SEPSIS           | 0.364      | 0.173                    | 0.765                    | 0.0078  |        |
| PCT_CHG_40 PLAT_COUNT SEPSIS<br>HAEMOGLOBIN         | PCT_CHG_40       | 0.555      | 0.250                    | 1.235                    | 0.1497  | 302.58 |
|                                                     | PLAT_COUNT       | 1.002      | 1.000                    | 1.005                    | 0.0233  |        |
|                                                     | SEPSIS           | 0.372      | 0.176                    | 0.784                    | 0.0095  |        |
|                                                     | HAEMOGLOBIN      | 0.989      | 0.971                    | 1.006                    | 0.1994  |        |
| PCT_CHG_40 SEX PLAT_COUNT SEPSIS TRT                | PCT_CHG_40       | 0.558      | 0.253                    | 1.231                    | 0.1487  | 302.81 |
|                                                     | Female vs. Male  | 0.555      | 0.256                    | 1.203                    | 0.1363  |        |
|                                                     | PLAT_COUNT       | 1.003      | 1.000                    | 1.005                    | 0.0186  |        |
|                                                     | SEPSIS           | 0.365      | 0.172                    | 0.771                    | 0.0084  |        |
|                                                     | Trt: High vs. Lo | 1.399      | 0.727                    | 2.690                    | 0.3151  |        |
| PCT_CHG_40 SEX PLAT_COUNT SEPSIS<br>HAEMOGLOBIN TRT | PCT_CHG_40       | 0.608      | 0.272                    | 1.358                    | 0.2253  | 303.19 |
|                                                     | Female vs. Male  | 0.555      | 0.255                    | 1.209                    | 0.1388  |        |
|                                                     | PLAT_COUNT       | 1.003      | 1.000                    | 1.005                    | 0.0225  |        |
|                                                     | SEPSIS           | 0.376      | 0.177                    | 0.797                    | 0.0109  |        |
|                                                     | HAEMOGLOBIN      | 0.989      | 0.972                    | 1.007                    | 0.2188  |        |
|                                                     | Trt: High vs. Lo | 1.374      | 0.713                    | 2.648                    | 0.3434  |        |
| PCT_CHG_40 SEX SOFA PLAT_COUNT<br>SEPSIS            | PCT_CHG_40       | 0.579      | 0.260                    | 1.289                    | 0.1813  | 303.22 |
|                                                     | Female vs. Male  | 0.547      | 0.252                    | 1.184                    | 0.1261  |        |
|                                                     | SOFA             | 0.790      | 0.435                    | 1.435                    | 0.4382  |        |
|                                                     | PLAT_COUNT       | 1.002      | 1.000                    | 1.005                    | 0.0510  |        |
|                                                     | SEPSIS           | 0.380      | 0.179                    | 0.808                    | 0.0122  |        |

| Model Variables                                   | Predictor        | Odds Ratio | OR 95% CI<br>Lower Bound | OR 95% CI<br>Upper Bound | p-value | AIC    |
|---------------------------------------------------|------------------|------------|--------------------------|--------------------------|---------|--------|
| PCT_CHG_40 PLAT_COUNT SEPSIS TRT                  | PCT_CHG_40       | 0.523      | 0.237                    | 1.154                    | 0.1088  | 303.23 |
|                                                   | PLAT_COUNT       | 1.003      | 1.000                    | 1.005                    | 0.0231  |        |
|                                                   | SEPSIS           | 0.357      | 0.170                    | 0.752                    | 0.0069  |        |
|                                                   | Trt: High vs. Lo | 1.419      | 0.739                    | 2.727                    | 0.2935  |        |
| PCT_CHG_40 SEX SOFA PLAT_COUNT SEPSIS HAEMOGLOBIN | PCT_CHG_40       | 0.639      | 0.283                    | 1.445                    | 0.2824  | 303.45 |
|                                                   | Female vs. Male  | 0.549      | 0.252                    | 1.194                    | 0.1306  |        |
|                                                   | SOFA             | 0.781      | 0.426                    | 1.433                    | 0.4256  |        |
|                                                   | PLAT_COUNT       | 1.002      | 1.000                    | 1.005                    | 0.0562  |        |
|                                                   | SEPSIS           | 0.393      | 0.184                    | 0.839                    | 0.0160  |        |
|                                                   | HAEMOGLOBIN      | 0.989      | 0.971                    | 1.006                    | 0.1991  |        |
| PCT_CHG_40 PLAT_COUNT SEPSIS HAEMOGLOBIN TRT      | PCT_CHG_40       | 0.565      | 0.253                    | 1.259                    | 0.1628  | 303.58 |
|                                                   | PLAT_COUNT       | 1.002      | 1.000                    | 1.005                    | 0.0286  |        |
|                                                   | SEPSIS           | 0.365      | 0.173                    | 0.771                    | 0.0084  |        |
|                                                   | HAEMOGLOBIN      | 0.989      | 0.972                    | 1.006                    | 0.2143  |        |
|                                                   | Trt: High vs. Lo | 1.395      | 0.725                    | 2.685                    | 0.3195  |        |
| PCT_CHG_40 SEX PLAT_COUNT SEPSIS WHITE_CELL_COUNT | PCT_CHG_40       | 0.558      | 0.252                    | 1.236                    | 0.1511  | 303.69 |
|                                                   | Female vs. Male  | 0.549      | 0.253                    | 1.189                    | 0.1288  |        |
|                                                   | PLAT_COUNT       | 1.003      | 1.001                    | 1.005                    | 0.0152  |        |
|                                                   | SEPSIS           | 0.376      | 0.177                    | 0.799                    | 0.0111  |        |
|                                                   | WHITE_CELL_COUNT | 0.993      | 0.955                    | 1.032                    | 0.7171  |        |
| PCT_CHG_40 SEX PLAT_COUNT SEPSIS ALBUMIN          | PCT_CHG_40       | 0.543      | 0.247                    | 1.196                    | 0.1303  | 303.70 |
|                                                   | Female vs. Male  | 0.549      | 0.254                    | 1.189                    | 0.1290  |        |
|                                                   | PLAT_COUNT       | 1.003      | 1.001                    | 1.005                    | 0.0160  |        |
|                                                   | SEPSIS           | 0.378      | 0.177                    | 0.808                    | 0.0123  |        |
|                                                   | ALBUMIN          | 1.009      | 0.963                    | 1.056                    | 0.7195  |        |
| PCT_CHG_40 AGE SEX PLAT_COUNT SEPSIS              | PCT_CHG_40       | 0.541      | 0.245                    | 1.195                    | 0.1293  | 303.70 |
|                                                   | AGE              | 0.996      | 0.976                    | 1.017                    | 0.7199  |        |
|                                                   | Female vs. Male  | 0.546      | 0.252                    | 1.183                    | 0.1256  |        |
|                                                   | PLAT_COUNT       | 1.003      | 1.001                    | 1.005                    | 0.0151  |        |
|                                                   | SEPSIS           | 0.367      | 0.174                    | 0.776                    | 0.0088  |        |
| PCT_CHG_40 SEX PLAT_COUNT SEPSIS INR              | PCT_CHG_40       | 0.538      | 0.242                    | 1.193                    | 0.1275  | 303.72 |
|                                                   | Female vs. Male  | 0.540      | 0.247                    | 1.179                    | 0.1224  |        |
|                                                   | PLAT_COUNT       | 1.003      | 1.001                    | 1.005                    | 0.0155  |        |
|                                                   | SEPSIS           | 0.369      | 0.174                    | 0.779                    | 0.0091  |        |
|                                                   | INR              | 1.058      | 0.775                    | 1.445                    | 0.7211  |        |

| Model Variables                                         | Predictor       | Odds Ratio | OR 95% CI<br>Lower Bound | OR 95% CI<br>Upper Bound | p-value | AIC    |
|---------------------------------------------------------|-----------------|------------|--------------------------|--------------------------|---------|--------|
| PCT_CHG_40 SEX PLAT_COUNT SEPSIS<br>HAEMOGLOBIN ALBUMIN | PCT_CHG_40      | 0.597      | 0.268                    | 1.332                    | 0.2082  | 303.74 |
|                                                         | Female vs. Male | 0.547      | 0.251                    | 1.191                    | 0.1293  |        |
|                                                         | PLAT_COUNT      | 1.003      | 1.000                    | 1.005                    | 0.0188  |        |
|                                                         | SEPSIS          | 0.398      | 0.185                    | 0.855                    | 0.0184  |        |
|                                                         | HAEMOGLOBIN     | 0.988      | 0.971                    | 1.005                    | 0.1754  |        |
|                                                         | ALBUMIN         | 1.015      | 0.968                    | 1.064                    | 0.5478  |        |
| PCT_CHG_40 SOFA PLAT_COUNT SEPSIS                       | PCT_CHG_40      | 0.542      | 0.244                    | 1.205                    | 0.1337  | 303.78 |
|                                                         | SOFA            | 0.800      | 0.446                    | 1.434                    | 0.4539  |        |
|                                                         | PLAT_COUNT      | 1.002      | 1.000                    | 1.005                    | 0.0603  |        |
|                                                         | SEPSIS          | 0.374      | 0.177                    | 0.790                    | 0.0102  |        |

| Model Variables                                     | Predictor        | Odds Ratio | OR 95% CI<br>Lower Bound | OR 95% CI<br>Upper Bound | p-value | AIC    |
|-----------------------------------------------------|------------------|------------|--------------------------|--------------------------|---------|--------|
| PCT_CHG_50 SEX PLAT_COUNT SEPSIS                    | PCT_CHG_50       | 0.534      | 0.214                    | 1.332                    | 0.1791  | 302.23 |
|                                                     | Female vs. Male  | 0.543      | 0.251                    | 1.174                    | 0.1209  |        |
|                                                     | PLAT_COUNT       | 1.003      | 1.000                    | 1.005                    | 0.0181  |        |
|                                                     | SEPSIS           | 0.366      | 0.174                    | 0.773                    | 0.0086  |        |
| PCT_CHG_50 SEX PLAT_COUNT SEPSIS<br>HAEMOGLOBIN     | PCT_CHG_50       | 0.584      | 0.230                    | 1.478                    | 0.2565  | 302.36 |
|                                                     | Female vs. Male  | 0.544      | 0.250                    | 1.182                    | 0.1247  |        |
|                                                     | PLAT_COUNT       | 1.003      | 1.000                    | 1.005                    | 0.0195  |        |
|                                                     | SEPSIS           | 0.378      | 0.179                    | 0.801                    | 0.0113  |        |
|                                                     | HAEMOGLOBIN      | 0.988      | 0.971                    | 1.006                    | 0.1868  |        |
| PCT_CHG_50 PLAT_COUNT SEPSIS                        | PCT_CHG_50       | 0.501      | 0.200                    | 1.251                    | 0.1393  | 302.87 |
|                                                     | PLAT_COUNT       | 1.002      | 1.000                    | 1.005                    | 0.0236  |        |
|                                                     | SEPSIS           | 0.361      | 0.172                    | 0.759                    | 0.0074  |        |
| PCT_CHG_50 PLAT_COUNT SEPSIS<br>HAEMOGLOBIN         | PCT_CHG_50       | 0.539      | 0.213                    | 1.367                    | 0.1934  | 302.94 |
|                                                     | PLAT_COUNT       | 1.002      | 1.000                    | 1.005                    | 0.0258  |        |
|                                                     | SEPSIS           | 0.370      | 0.176                    | 0.780                    | 0.0091  |        |
|                                                     | HAEMOGLOBIN      | 0.988      | 0.971                    | 1.006                    | 0.1804  |        |
| PCT_CHG_50 SEX PLAT_COUNT SEPSIS TRT                | PCT_CHG_50       | 0.537      | 0.215                    | 1.341                    | 0.1833  | 303.08 |
|                                                     | Female vs. Male  | 0.549      | 0.254                    | 1.188                    | 0.1286  |        |
|                                                     | PLAT_COUNT       | 1.003      | 1.000                    | 1.005                    | 0.0215  |        |
|                                                     | SEPSIS           | 0.361      | 0.171                    | 0.763                    | 0.0078  |        |
|                                                     | Trt: High vs. Lo | 1.428      | 0.742                    | 2.745                    | 0.2862  |        |
| PCT_CHG_50 SEX PLAT_COUNT SEPSIS<br>HAEMOGLOBIN TRT | PCT_CHG_50       | 0.585      | 0.231                    | 1.483                    | 0.2593  | 303.36 |
|                                                     | Female vs. Male  | 0.551      | 0.253                    | 1.198                    | 0.1329  |        |
|                                                     | PLAT_COUNT       | 1.002      | 1.000                    | 1.005                    | 0.0248  |        |
|                                                     | SEPSIS           | 0.373      | 0.176                    | 0.791                    | 0.0103  |        |
|                                                     | HAEMOGLOBIN      | 0.989      | 0.971                    | 1.006                    | 0.2052  |        |
|                                                     | Trt: High vs. Lo | 1.395      | 0.724                    | 2.689                    | 0.3204  |        |
| PCT_CHG_50 SEX SOFA PLAT_COUNT<br>SEPSIS            | PCT_CHG_50       | 0.565      | 0.225                    | 1.420                    | 0.2254  | 303.51 |
|                                                     | Female vs. Male  | 0.541      | 0.250                    | 1.171                    | 0.1192  |        |
|                                                     | SOFA             | 0.773      | 0.425                    | 1.407                    | 0.3997  |        |
|                                                     | PLAT_COUNT       | 1.002      | 1.000                    | 1.005                    | 0.0588  |        |
|                                                     | SEPSIS           | 0.379      | 0.179                    | 0.806                    | 0.0119  |        |

| Model Variables                                      | Predictor        | Odds Ratio | OR 95% CI Lower Bound | OR 95% CI Upper Bound | p-value | AIC    |
|------------------------------------------------------|------------------|------------|-----------------------|-----------------------|---------|--------|
| PCT_CHG_50 PLAT_COUNT SEPSIS TRT                     | PCT_CHG_50       | 0.504      | 0.202                 | 1.260                 | 0.1432  | 303.61 |
|                                                      | PLAT_COUNT       | 1.002      | 1.000                 | 1.005                 | 0.0271  |        |
|                                                      | SEPSIS           | 0.354      | 0.168                 | 0.745                 | 0.0063  |        |
|                                                      | Trt: High vs. Lo | 1.450      | 0.755                 | 2.785                 | 0.2644  |        |
| PCT_CHG_50 SEX SOFA PLAT_COUNT SEPSIS HAEMOGLOBIN    | PCT_CHG_50       | 0.624      | 0.244                 | 1.594                 | 0.3245  | 303.62 |
|                                                      | Female vs. Male  | 0.545      | 0.251                 | 1.184                 | 0.1255  |        |
|                                                      | SOFA             | 0.768      | 0.419                 | 1.409                 | 0.3945  |        |
|                                                      | PLAT_COUNT       | 1.002      | 1.000                 | 1.005                 | 0.0615  |        |
|                                                      | SEPSIS           | 0.392      | 0.184                 | 0.837                 | 0.0158  |        |
|                                                      | HAEMOGLOBIN      | 0.988      | 0.971                 | 1.006                 | 0.1847  |        |
| PCT_CHG_50 PLAT_COUNT SEPSIS HAEMOGLOBIN TRT         | PCT_CHG_50       | 0.542      | 0.214                 | 1.374                 | 0.1973  | 303.83 |
|                                                      | PLAT_COUNT       | 1.002      | 1.000                 | 1.005                 | 0.0319  |        |
|                                                      | SEPSIS           | 0.363      | 0.172                 | 0.765                 | 0.0079  |        |
|                                                      | HAEMOGLOBIN      | 0.988      | 0.971                 | 1.006                 | 0.1976  |        |
|                                                      | Trt: High vs. Lo | 1.420      | 0.738                 | 2.733                 | 0.2944  |        |
| PCT_CHG_50 SEX PLAT_COUNT SEPSIS HAEMOGLOBIN ALBUMIN | PCT_CHG_50       | 0.579      | 0.228                 | 1.469                 | 0.2507  | 303.98 |
|                                                      | Female vs. Male  | 0.542      | 0.250                 | 1.178                 | 0.1226  |        |
|                                                      | PLAT_COUNT       | 1.003      | 1.000                 | 1.005                 | 0.0204  |        |
|                                                      | SEPSIS           | 0.396      | 0.185                 | 0.851                 | 0.0178  |        |
|                                                      | HAEMOGLOBIN      | 0.987      | 0.970                 | 1.005                 | 0.1605  |        |
|                                                      | ALBUMIN          | 1.015      | 0.968                 | 1.064                 | 0.5377  |        |
| PCT_CHG_50 AGE SEX PLAT_COUNT SEPSIS                 | PCT_CHG_50       | 0.524      | 0.209                 | 1.314                 | 0.1688  | 304.08 |
|                                                      | AGE              | 0.996      | 0.976                 | 1.016                 | 0.6911  |        |
|                                                      | Female vs. Male  | 0.539      | 0.249                 | 1.167                 | 0.1171  |        |
|                                                      | PLAT_COUNT       | 1.003      | 1.000                 | 1.005                 | 0.0172  |        |
|                                                      | SEPSIS           | 0.364      | 0.173                 | 0.769                 | 0.0082  |        |
| PCT_CHG_50 SEX PLAT_COUNT SEPSIS WHITE_CELL_COUNT    | PCT_CHG_50       | 0.547      | 0.217                 | 1.376                 | 0.2003  | 304.09 |
|                                                      | Female vs. Male  | 0.542      | 0.251                 | 1.174                 | 0.1210  |        |
|                                                      | PLAT_COUNT       | 1.003      | 1.000                 | 1.005                 | 0.0174  |        |
|                                                      | SEPSIS           | 0.374      | 0.176                 | 0.793                 | 0.0105  |        |
|                                                      | WHITE_CELL_COUNT | 0.993      | 0.955                 | 1.032                 | 0.7166  |        |

| Model Variables                                     | Predictor       | Odds Ratio | OR 95% CI<br>Lower Bound | OR 95% CI<br>Upper Bound | p-value | AIC    |
|-----------------------------------------------------|-----------------|------------|--------------------------|--------------------------|---------|--------|
| PCT_CHG_50 SEX PLAT_COUNT SEPSIS<br>ALBUMIN         | PCT_CHG_50      | 0.528      | 0.211                    | 1.319                    | 0.1719  | 304.09 |
|                                                     | Female vs. Male | 0.543      | 0.251                    | 1.174                    | 0.1209  |        |
|                                                     | PLAT_COUNT      | 1.003      | 1.000                    | 1.005                    | 0.0183  |        |
|                                                     | SEPSIS          | 0.376      | 0.176                    | 0.802                    | 0.0116  |        |
|                                                     | ALBUMIN         | 1.009      | 0.963                    | 1.057                    | 0.7079  |        |
| PCT_CHG_50 SEX PLAT_COUNT SEPSIS INR                | PCT_CHG_50      | 0.522      | 0.207                    | 1.317                    | 0.1692  | 304.12 |
|                                                     | Female vs. Male | 0.533      | 0.245                    | 1.163                    | 0.1146  |        |
|                                                     | PLAT_COUNT      | 1.003      | 1.000                    | 1.005                    | 0.0178  |        |
|                                                     | SEPSIS          | 0.366      | 0.173                    | 0.772                    | 0.0085  |        |
|                                                     | INR             | 1.059      | 0.772                    | 1.453                    | 0.7204  |        |
| PCT_CHG_50 SEX PLAT_COUNT SEPSIS INR<br>HAEMOGLOBIN | PCT_CHG_50      | 0.565      | 0.220                    | 1.450                    | 0.2352  | 304.14 |
|                                                     | Female vs. Male | 0.532      | 0.243                    | 1.166                    | 0.1154  |        |
|                                                     | PLAT_COUNT      | 1.003      | 1.000                    | 1.005                    | 0.0191  |        |
|                                                     | SEPSIS          | 0.378      | 0.179                    | 0.800                    | 0.0112  |        |
|                                                     | INR             | 1.083      | 0.790                    | 1.486                    | 0.6189  |        |
|                                                     | HAEMOGLOBIN     | 0.988      | 0.971                    | 1.005                    | 0.1761  |        |
| PCT_CHG_50 SOFA PLAT_COUNT SEPSIS                   | PCT_CHG_50      | 0.529      | 0.211                    | 1.331                    | 0.1767  | 304.17 |
|                                                     | SOFA            | 0.781      | 0.435                    | 1.402                    | 0.4076  |        |
|                                                     | PLAT_COUNT      | 1.002      | 1.000                    | 1.004                    | 0.0712  |        |
|                                                     | SEPSIS          | 0.373      | 0.177                    | 0.789                    | 0.0100  |        |
| PCT_CHG_50 SOFA PLAT_COUNT SEPSIS<br>HAEMOGLOBIN    | PCT_CHG_50      | 0.577      | 0.226                    | 1.477                    | 0.2521  | 304.19 |
|                                                     | SOFA            | 0.771      | 0.425                    | 1.396                    | 0.3908  |        |
|                                                     | PLAT_COUNT      | 1.002      | 1.000                    | 1.004                    | 0.0765  |        |
|                                                     | SEPSIS          | 0.384      | 0.181                    | 0.813                    | 0.0126  |        |
|                                                     | HAEMOGLOBIN     | 0.988      | 0.971                    | 1.005                    | 0.1744  |        |
| PCT_CHG_50 AGE SEX PLAT_COUNT SEPSIS<br>HAEMOGLOBIN | PCT_CHG_50      | 0.574      | 0.225                    | 1.460                    | 0.2442  | 304.20 |
|                                                     | AGE             | 0.996      | 0.976                    | 1.016                    | 0.6812  |        |
|                                                     | Female vs. Male | 0.539      | 0.248                    | 1.174                    | 0.1202  |        |
|                                                     | PLAT_COUNT      | 1.003      | 1.000                    | 1.005                    | 0.0188  |        |
|                                                     | SEPSIS          | 0.376      | 0.178                    | 0.796                    | 0.0108  |        |
|                                                     | HAEMOGLOBIN     | 0.988      | 0.971                    | 1.006                    | 0.1857  |        |



| Model Variables                                      | Predictor        | Odds Ratio | OR 95% CI<br>Lower Bound | OR 95% CI<br>Upper Bound | p-value | AIC    |
|------------------------------------------------------|------------------|------------|--------------------------|--------------------------|---------|--------|
| PCT_CHG_60 SEX PLAT_COUNT SEPSIS<br>HAEMOGLOBIN      | PCT_CHG_60       | 0.750      | 0.253                    | 2.227                    | 0.6045  | 303.50 |
|                                                      | Female vs. Male  | 0.529      | 0.243                    | 1.152                    | 0.1095  |        |
|                                                      | PLAT_COUNT       | 1.002      | 1.000                    | 1.004                    | 0.0270  |        |
|                                                      | SEPSIS           | 0.377      | 0.178                    | 0.797                    | 0.0109  |        |
|                                                      | HAEMOGLOBIN      | 0.987      | 0.971                    | 1.004                    | 0.1450  |        |
| PCT_CHG_60 SEX PLAT_COUNT SEPSIS                     | PCT_CHG_60       | 0.703      | 0.240                    | 2.060                    | 0.5208  | 303.82 |
|                                                      | Female vs. Male  | 0.530      | 0.245                    | 1.147                    | 0.1074  |        |
|                                                      | PLAT_COUNT       | 1.002      | 1.000                    | 1.004                    | 0.0264  |        |
|                                                      | SEPSIS           | 0.364      | 0.173                    | 0.767                    | 0.0080  |        |
| PCT_CHG_60 PLAT_COUNT SEPSIS<br>HAEMOGLOBIN          | PCT_CHG_60       | 0.680      | 0.229                    | 2.016                    | 0.4871  | 304.32 |
|                                                      | PLAT_COUNT       | 1.002      | 1.000                    | 1.004                    | 0.0386  |        |
|                                                      | SEPSIS           | 0.368      | 0.175                    | 0.775                    | 0.0087  |        |
|                                                      | HAEMOGLOBIN      | 0.987      | 0.970                    | 1.004                    | 0.1420  |        |
| PCT_CHG_60 SEX PLAT_COUNT SEPSIS<br>HAEMOGLOBIN TRT  | PCT_CHG_60       | 0.746      | 0.251                    | 2.222                    | 0.5991  | 304.47 |
|                                                      | Female vs. Male  | 0.536      | 0.246                    | 1.168                    | 0.1172  |        |
|                                                      | PLAT_COUNT       | 1.002      | 1.000                    | 1.004                    | 0.0339  |        |
|                                                      | SEPSIS           | 0.372      | 0.176                    | 0.787                    | 0.0099  |        |
|                                                      | HAEMOGLOBIN      | 0.988      | 0.971                    | 1.005                    | 0.1613  |        |
|                                                      | Trt: High vs. Lo | 1.401      | 0.727                    | 2.699                    | 0.3140  |        |
| PCT_CHG_60 SEX SOFA PLAT_COUNT<br>SEPSIS HAEMOGLOBIN | PCT_CHG_60       | 0.790      | 0.266                    | 2.343                    | 0.6707  | 304.49 |
|                                                      | Female vs. Male  | 0.532      | 0.245                    | 1.157                    | 0.1120  |        |
|                                                      | SOFA             | 0.738      | 0.405                    | 1.344                    | 0.3211  |        |
|                                                      | PLAT_COUNT       | 1.002      | 1.000                    | 1.004                    | 0.0836  |        |
|                                                      | SEPSIS           | 0.393      | 0.184                    | 0.837                    | 0.0158  |        |
|                                                      | HAEMOGLOBIN      | 0.987      | 0.971                    | 1.004                    | 0.1463  |        |
| PCT_CHG_60 SEX PLAT_COUNT SEPSIS TRT                 | PCT_CHG_60       | 0.698      | 0.238                    | 2.049                    | 0.5129  | 304.61 |
|                                                      | Female vs. Male  | 0.536      | 0.248                    | 1.162                    | 0.1146  |        |
|                                                      | PLAT_COUNT       | 1.002      | 1.000                    | 1.004                    | 0.0309  |        |
|                                                      | SEPSIS           | 0.359      | 0.170                    | 0.757                    | 0.0073  |        |
|                                                      | Trt: High vs. Lo | 1.440      | 0.750                    | 2.766                    | 0.2741  |        |
| PCT_CHG_60 PLAT_COUNT SEPSIS                         | PCT_CHG_60       | 0.648      | 0.222                    | 1.894                    | 0.4284  | 304.68 |
|                                                      | PLAT_COUNT       | 1.002      | 1.000                    | 1.004                    | 0.0371  |        |
|                                                      | SEPSIS           | 0.359      | 0.171                    | 0.753                    | 0.0069  |        |

| Model Variables                                               | Predictor        | Odds Ratio | OR 95% CI<br>Lower Bound | OR 95% CI<br>Upper Bound | p-value | AIC    |
|---------------------------------------------------------------|------------------|------------|--------------------------|--------------------------|---------|--------|
| PCT_CHG_60 SEX SOFA PLAT_COUNT SEPSIS                         | PCT_CHG_60       | 0.731      | 0.249                    | 2.141                    | 0.5673  | 304.79 |
|                                                               | Female vs. Male  | 0.528      | 0.244                    | 1.144                    | 0.1061  |        |
|                                                               | SOFA             | 0.740      | 0.410                    | 1.334                    | 0.3168  |        |
|                                                               | PLAT_COUNT       | 1.002      | 1.000                    | 1.004                    | 0.0851  |        |
|                                                               | SEPSIS           | 0.379      | 0.178                    | 0.804                    | 0.0117  |        |
| PCT_CHG_60 SEX PLAT_COUNT SEPSIS HAEMOGLOBIN ALBUMIN          | PCT_CHG_60       | 0.751      | 0.253                    | 2.231                    | 0.6062  | 305.16 |
|                                                               | Female vs. Male  | 0.528      | 0.243                    | 1.149                    | 0.1080  |        |
|                                                               | PLAT_COUNT       | 1.002      | 1.000                    | 1.004                    | 0.0286  |        |
|                                                               | SEPSIS           | 0.395      | 0.184                    | 0.848                    | 0.0174  |        |
|                                                               | HAEMOGLOBIN      | 0.987      | 0.970                    | 1.004                    | 0.1232  |        |
|                                                               | ALBUMIN          | 1.014      | 0.967                    | 1.063                    | 0.5602  |        |
| PCT_CHG_60 PLAT_COUNT SEPSIS HAEMOGLOBIN TRT                  | PCT_CHG_60       | 0.679      | 0.228                    | 2.020                    | 0.4865  | 305.17 |
|                                                               | PLAT_COUNT       | 1.002      | 1.000                    | 1.004                    | 0.0468  |        |
|                                                               | SEPSIS           | 0.361      | 0.171                    | 0.761                    | 0.0075  |        |
|                                                               | HAEMOGLOBIN      | 0.988      | 0.971                    | 1.005                    | 0.1575  |        |
|                                                               | Trt: High vs. Lo | 1.428      | 0.742                    | 2.746                    | 0.2866  |        |
| PCT_CHG_60 SEX SOFA SEPSIS HAEMOGLOBIN                        | PCT_CHG_60       | 0.844      | 0.287                    | 2.479                    | 0.7576  | 305.18 |
|                                                               | Female vs. Male  | 0.560      | 0.259                    | 1.209                    | 0.1401  |        |
|                                                               | SOFA             | 0.623      | 0.349                    | 1.112                    | 0.1096  |        |
|                                                               | SEPSIS           | 0.437      | 0.207                    | 0.922                    | 0.0300  |        |
|                                                               | HAEMOGLOBIN      | 0.987      | 0.970                    | 1.005                    | 0.1494  |        |
| PCT_CHG_60 SOFA PLAT_COUNT SEPSIS HAEMOGLOBIN                 | PCT_CHG_60       | 0.720      | 0.243                    | 2.132                    | 0.5533  | 305.26 |
|                                                               | SOFA             | 0.738      | 0.411                    | 1.328                    | 0.3111  |        |
|                                                               | PLAT_COUNT       | 1.002      | 1.000                    | 1.004                    | 0.1118  |        |
|                                                               | SEPSIS           | 0.384      | 0.181                    | 0.813                    | 0.0127  |        |
|                                                               | HAEMOGLOBIN      | 0.987      | 0.970                    | 1.004                    | 0.1380  |        |
| PCT_CHG_60 SEX PLAT_COUNT SEPSIS HAEMOGLOBIN WHITE_CELL_COUNT | PCT_CHG_60       | 0.761      | 0.255                    | 2.266                    | 0.6233  | 305.34 |
|                                                               | Female vs. Male  | 0.528      | 0.242                    | 1.151                    | 0.1089  |        |
|                                                               | PLAT_COUNT       | 1.002      | 1.000                    | 1.005                    | 0.0260  |        |
|                                                               | SEPSIS           | 0.384      | 0.181                    | 0.816                    | 0.0130  |        |
|                                                               | HAEMOGLOBIN      | 0.988      | 0.971                    | 1.005                    | 0.1552  |        |
|                                                               | WHITE_CELL_COUNT | 0.993      | 0.956                    | 1.031                    | 0.7069  |        |

| Model Variables                                          | Predictor        | Odds Ratio | OR 95% CI<br>Lower Bound | OR 95% CI<br>Upper Bound | p-value | AIC    |
|----------------------------------------------------------|------------------|------------|--------------------------|--------------------------|---------|--------|
| PCT_CHG_60 PLAT_COUNT SEPSIS TRT                         | PCT_CHG_60       | 0.644      | 0.220                    | 1.887                    | 0.4230  | 305.34 |
|                                                          | PLAT_COUNT       | 1.002      | 1.000                    | 1.004                    | 0.0416  |        |
|                                                          | SEPSIS           | 0.351      | 0.167                    | 0.738                    | 0.0059  |        |
|                                                          | Trt: High vs. Lo | 1.464      | 0.763                    | 2.810                    | 0.2518  |        |
| PCT_CHG_60 SEX PLAT_COUNT SEPSIS INR<br>HAEMOGLOBIN      | PCT_CHG_60       | 0.735      | 0.246                    | 2.201                    | 0.5826  | 305.39 |
|                                                          | Female vs. Male  | 0.520      | 0.237                    | 1.142                    | 0.1038  |        |
|                                                          | PLAT_COUNT       | 1.002      | 1.000                    | 1.004                    | 0.0270  |        |
|                                                          | SEPSIS           | 0.377      | 0.178                    | 0.797                    | 0.0109  |        |
|                                                          | INR              | 1.060      | 0.768                    | 1.463                    | 0.7246  |        |
|                                                          | HAEMOGLOBIN      | 0.987      | 0.970                    | 1.004                    | 0.1390  |        |
| PCT_CHG_60 AGE SEX PLAT_COUNT SEPSIS<br>HAEMOGLOBIN      | PCT_CHG_60       | 0.743      | 0.249                    | 2.211                    | 0.5930  | 305.39 |
|                                                          | AGE              | 0.997      | 0.977                    | 1.017                    | 0.7425  |        |
|                                                          | Female vs. Male  | 0.526      | 0.241                    | 1.146                    | 0.1062  |        |
|                                                          | PLAT_COUNT       | 1.002      | 1.000                    | 1.004                    | 0.0266  |        |
|                                                          | SEPSIS           | 0.375      | 0.177                    | 0.794                    | 0.0106  |        |
|                                                          | HAEMOGLOBIN      | 0.987      | 0.971                    | 1.004                    | 0.1429  |        |
| PCT_CHG_60 SEX SOFA SEPSIS                               | PCT_CHG_60       | 0.764      | 0.262                    | 2.226                    | 0.6213  | 305.46 |
|                                                          | Female vs. Male  | 0.552      | 0.256                    | 1.190                    | 0.1300  |        |
|                                                          | SOFA             | 0.626      | 0.355                    | 1.105                    | 0.1065  |        |
|                                                          | SEPSIS           | 0.419      | 0.199                    | 0.880                    | 0.0220  |        |
| PCT_CHG_60 SEX SOFA PLAT_COUNT<br>SEPSIS HAEMOGLOBIN TRT | PCT_CHG_60       | 0.786      | 0.264                    | 2.339                    | 0.6656  | 305.50 |
|                                                          | Female vs. Male  | 0.539      | 0.248                    | 1.173                    | 0.1198  |        |
|                                                          | SOFA             | 0.743      | 0.410                    | 1.349                    | 0.3300  |        |
|                                                          | PLAT_COUNT       | 1.002      | 1.000                    | 1.004                    | 0.0906  |        |
|                                                          | SEPSIS           | 0.387      | 0.182                    | 0.826                    | 0.0143  |        |
|                                                          | HAEMOGLOBIN      | 0.988      | 0.971                    | 1.005                    | 0.1596  |        |
|                                                          | Trt: High vs. Lo | 1.392      | 0.723                    | 2.682                    | 0.3227  |        |

| Model Variables                                  | Predictor        | Odds Ratio | OR 95% CI<br>Lower Bound | OR 95% CI<br>Upper Bound | p-value | AIC    |
|--------------------------------------------------|------------------|------------|--------------------------|--------------------------|---------|--------|
| NADIR_GE100 SEX SEPSIS HAEMOGLOBIN               | NADIR_GE100      | 2.209      | 1.056                    | 4.618                    | 0.0356  | 301.10 |
|                                                  | Female vs. Male  | 0.578      | 0.268                    | 1.246                    | 0.1626  |        |
|                                                  | SEPSIS           | 0.418      | 0.199                    | 0.875                    | 0.0209  |        |
|                                                  | HAEMOGLOBIN      | 0.987      | 0.970                    | 1.005                    | 0.1567  |        |
| NADIR_GE100 SEPSIS HAEMOGLOBIN                   | NADIR_GE100      | 2.261      | 1.083                    | 4.720                    | 0.0301  | 301.21 |
|                                                  | SEPSIS           | 0.400      | 0.191                    | 0.834                    | 0.0148  |        |
|                                                  | HAEMOGLOBIN      | 0.987      | 0.970                    | 1.004                    | 0.1429  |        |
| NADIR_GE100 SEX SEPSIS                           | NADIR_GE100      | 2.254      | 1.079                    | 4.707                    | 0.0308  | 301.30 |
|                                                  | Female vs. Male  | 0.569      | 0.265                    | 1.223                    | 0.1490  |        |
|                                                  | SEPSIS           | 0.404      | 0.193                    | 0.843                    | 0.0160  |        |
| NADIR_GE100 SEPSIS                               | NADIR_GE100      | 2.295      | 1.100                    | 4.786                    | 0.0271  | 301.56 |
|                                                  | SEPSIS           | 0.389      | 0.187                    | 0.810                    | 0.0119  |        |
| NADIR_GE100 SEX PLAT_COUNT SEPSIS<br>HAEMOGLOBIN | NADIR_GE100      | 1.783      | 0.778                    | 4.083                    | 0.1719  | 301.83 |
|                                                  | Female vs. Male  | 0.546      | 0.251                    | 1.187                    | 0.1272  |        |
|                                                  | PLAT_COUNT       | 1.001      | 0.999                    | 1.004                    | 0.2423  |        |
|                                                  | SEPSIS           | 0.391      | 0.185                    | 0.828                    | 0.0144  |        |
|                                                  | HAEMOGLOBIN      | 0.987      | 0.970                    | 1.004                    | 0.1464  |        |
| NADIR_GE100 SEX PLAT_COUNT SEPSIS                | NADIR_GE100      | 1.830      | 0.797                    | 4.201                    | 0.1543  | 302.15 |
|                                                  | Female vs. Male  | 0.542      | 0.250                    | 1.173                    | 0.1205  |        |
|                                                  | PLAT_COUNT       | 1.001      | 0.999                    | 1.004                    | 0.2644  |        |
|                                                  | SEPSIS           | 0.379      | 0.180                    | 0.801                    | 0.0112  |        |
| NADIR_GE100 SEX SEPSIS HAEMOGLOBIN<br>TRT        | NADIR_GE100      | 2.138      | 1.019                    | 4.485                    | 0.0449  | 302.21 |
|                                                  | Female vs. Male  | 0.583      | 0.270                    | 1.258                    | 0.1696  |        |
|                                                  | SEPSIS           | 0.411      | 0.196                    | 0.861                    | 0.0188  |        |
|                                                  | HAEMOGLOBIN      | 0.988      | 0.970                    | 1.005                    | 0.1661  |        |
|                                                  | Trt: High vs. Lo | 1.369      | 0.710                    | 2.639                    | 0.3490  |        |
| NADIR_GE100 SEPSIS HAEMOGLOBIN TRT               | NADIR_GE100      | 2.190      | 1.046                    | 4.586                    | 0.0380  | 302.26 |
|                                                  | SEPSIS           | 0.391      | 0.187                    | 0.818                    | 0.0128  |        |
|                                                  | HAEMOGLOBIN      | 0.987      | 0.970                    | 1.005                    | 0.1518  |        |
|                                                  | Trt: High vs. Lo | 1.385      | 0.719                    | 2.667                    | 0.3302  |        |
| NADIR_GE100 SEX SEPSIS TRT                       | NADIR_GE100      | 2.186      | 1.044                    | 4.578                    | 0.0385  | 302.31 |
|                                                  | Female vs. Male  | 0.574      | 0.267                    | 1.235                    | 0.1558  |        |
|                                                  | SEPSIS           | 0.397      | 0.190                    | 0.831                    | 0.0144  |        |
|                                                  | Trt: High vs. Lo | 1.391      | 0.723                    | 2.677                    | 0.3229  |        |

| Model Variables                               | Predictor        | Odds Ratio | OR 95% CI<br>Lower Bound | OR 95% CI<br>Upper Bound | p-value | AIC    |
|-----------------------------------------------|------------------|------------|--------------------------|--------------------------|---------|--------|
| NADIR_GE100 SEX SOFA SEPSIS<br>HAEMOGLOBIN    | NADIR_GE100      | 1.952      | 0.886                    | 4.299                    | 0.0973  | 302.35 |
|                                               | Female vs. Male  | 0.574      | 0.266                    | 1.239                    | 0.1580  |        |
|                                               | SOFA             | 0.763      | 0.411                    | 1.416                    | 0.3912  |        |
|                                               | SEPSIS           | 0.430      | 0.205                    | 0.905                    | 0.0264  |        |
|                                               | HAEMOGLOBIN      | 0.987      | 0.970                    | 1.005                    | 0.1579  |        |
| NADIR_GE100 PLAT_COUNT SEPSIS<br>HAEMOGLOBIN  | NADIR_GE100      | 1.906      | 0.836                    | 4.344                    | 0.1255  | 302.37 |
|                                               | PLAT_COUNT       | 1.001      | 0.999                    | 1.004                    | 0.3450  |        |
|                                               | SEPSIS           | 0.380      | 0.181                    | 0.801                    | 0.0112  |        |
|                                               | HAEMOGLOBIN      | 0.987      | 0.970                    | 1.004                    | 0.1381  |        |
| NADIR_GE100 SEPSIS TRT                        | NADIR_GE100      | 2.229      | 1.066                    | 4.660                    | 0.0335  | 302.50 |
|                                               | SEPSIS           | 0.381      | 0.182                    | 0.795                    | 0.0103  |        |
|                                               | Trt: High vs. Lo | 1.408      | 0.733                    | 2.706                    | 0.3047  |        |
| NADIR_GE100 SOFA SEPSIS HAEMOGLOBIN           | NADIR_GE100      | 2.012      | 0.917                    | 4.414                    | 0.0815  | 302.51 |
|                                               | SOFA             | 0.775      | 0.424                    | 1.416                    | 0.4067  |        |
|                                               | SEPSIS           | 0.410      | 0.196                    | 0.859                    | 0.0185  |        |
|                                               | HAEMOGLOBIN      | 0.987      | 0.970                    | 1.004                    | 0.1408  |        |
| NADIR_GE100 SEX SOFA SEPSIS                   | NADIR_GE100      | 1.997      | 0.910                    | 4.380                    | 0.0849  | 302.54 |
|                                               | Female vs. Male  | 0.562      | 0.261                    | 1.211                    | 0.1416  |        |
|                                               | SOFA             | 0.766      | 0.418                    | 1.404                    | 0.3881  |        |
|                                               | SEPSIS           | 0.415      | 0.198                    | 0.869                    | 0.0201  |        |
| NADIR_GE100 SEX SEPSIS HAEMOGLOBIN<br>ALBUMIN | NADIR_GE100      | 2.205      | 1.054                    | 4.610                    | 0.0360  | 302.71 |
|                                               | Female vs. Male  | 0.578      | 0.268                    | 1.245                    | 0.1617  |        |
|                                               | SEPSIS           | 0.437      | 0.206                    | 0.929                    | 0.0317  |        |
|                                               | HAEMOGLOBIN      | 0.986      | 0.969                    | 1.004                    | 0.1299  |        |
|                                               | ALBUMIN          | 1.015      | 0.968                    | 1.064                    | 0.5342  |        |
| NADIR_GE100 AGE SEX SEPSIS<br>HAEMOGLOBIN     | NADIR_GE100      | 2.287      | 1.084                    | 4.824                    | 0.0302  | 302.72 |
|                                               | AGE              | 0.994      | 0.974                    | 1.014                    | 0.5330  |        |
|                                               | Female vs. Male  | 0.574      | 0.266                    | 1.237                    | 0.1569  |        |
|                                               | SEPSIS           | 0.412      | 0.197                    | 0.864                    | 0.0192  |        |
|                                               | HAEMOGLOBIN      | 0.987      | 0.970                    | 1.005                    | 0.1490  |        |
| NADIR_GE100 PLAT_COUNT SEPSIS                 | NADIR_GE100      | 1.938      | 0.848                    | 4.431                    | 0.1172  | 302.79 |
|                                               | PLAT_COUNT       | 1.001      | 0.999                    | 1.004                    | 0.3621  |        |
|                                               | SEPSIS           | 0.371      | 0.177                    | 0.780                    | 0.0091  |        |

| Model Variables                                     | Predictor        | Odds Ratio | OR 95% CI Lower Bound | OR 95% CI Upper Bound | p-value | AIC    |
|-----------------------------------------------------|------------------|------------|-----------------------|-----------------------|---------|--------|
| NADIR_GE100 SEX SEPSIS INR HAEMOGLOBIN              | NADIR_GE100      | 2.254      | 1.073                 | 4.733                 | 0.0321  | 302.82 |
|                                                     | Female vs. Male  | 0.563      | 0.259                 | 1.224                 | 0.1475  |        |
|                                                     | SEPSIS           | 0.416      | 0.198                 | 0.871                 | 0.0202  |        |
|                                                     | INR              | 1.096      | 0.800                 | 1.503                 | 0.5684  |        |
|                                                     | HAEMOGLOBIN      | 0.987      | 0.969                 | 1.005                 | 0.1445  |        |
| NADIR_GE100 SEPSIS HAEMOGLOBIN ALBUMIN              | NADIR_GE100      | 2.259      | 1.082                 | 4.717                 | 0.0303  | 302.84 |
|                                                     | SEPSIS           | 0.418      | 0.197                 | 0.884                 | 0.0228  |        |
|                                                     | HAEMOGLOBIN      | 0.986      | 0.969                 | 1.004                 | 0.1202  |        |
|                                                     | ALBUMIN          | 1.015      | 0.969                 | 1.063                 | 0.5389  |        |
| NADIR_GE100 SOFA SEPSIS                             | NADIR_GE100      | 2.053      | 0.939                 | 4.488                 | 0.0719  | 302.89 |
|                                                     | SOFA             | 0.783      | 0.434                 | 1.413                 | 0.4168  |        |
|                                                     | SEPSIS           | 0.398      | 0.191                 | 0.832                 | 0.0145  |        |
| NADIR_GE100 AGE SEPSIS HAEMOGLOBIN                  | NADIR_GE100      | 2.342      | 1.110                 | 4.940                 | 0.0258  | 302.89 |
|                                                     | AGE              | 0.994      | 0.974                 | 1.014                 | 0.5677  |        |
|                                                     | SEPSIS           | 0.395      | 0.189                 | 0.825                 | 0.0137  |        |
|                                                     | HAEMOGLOBIN      | 0.987      | 0.970                 | 1.004                 | 0.1371  |        |
| NADIR_GE100 SEX PLAT_COUNT SEPSIS HAEMOGLOBIN TRT   | NADIR_GE100      | 1.737      | 0.758                 | 3.981                 | 0.1921  | 302.99 |
|                                                     | Female vs. Male  | 0.551      | 0.253                 | 1.201                 | 0.1341  |        |
|                                                     | PLAT_COUNT       | 1.001      | 0.999                 | 1.004                 | 0.2521  |        |
|                                                     | SEPSIS           | 0.385      | 0.182                 | 0.817                 | 0.0131  |        |
|                                                     | HAEMOGLOBIN      | 0.988      | 0.971                 | 1.005                 | 0.1601  |        |
|                                                     | Trt: High vs. Lo | 1.358      | 0.704                 | 2.621                 | 0.3616  |        |
| NADIR_GE100 AGE SEX SEPSIS                          | NADIR_GE100      | 2.322      | 1.103                 | 4.890                 | 0.0269  | 303.00 |
|                                                     | AGE              | 0.994      | 0.975                 | 1.015                 | 0.5829  |        |
|                                                     | Female vs. Male  | 0.565      | 0.263                 | 1.216                 | 0.1450  |        |
|                                                     | SEPSIS           | 0.400      | 0.191                 | 0.836                 | 0.0151  |        |
| NADIR_GE100 SEX SEPSIS HAEMOGLOBIN WHITE_CELL_COUNT | NADIR_GE100      | 2.209      | 1.057                 | 4.620                 | 0.0355  | 303.10 |
|                                                     | Female vs. Male  | 0.579      | 0.268                 | 1.249                 | 0.1638  |        |
|                                                     | SEPSIS           | 0.419      | 0.198                 | 0.884                 | 0.0228  |        |
|                                                     | HAEMOGLOBIN      | 0.987      | 0.970                 | 1.005                 | 0.1581  |        |
|                                                     | WHITE_CELL_COUNT | 0.999      | 0.968                 | 1.031                 | 0.9711  |        |

| Model Variables                                                                        | Predictor        | Odds Ratio | OR 95% CI Lower Bound | OR 95% CI Upper Bound | p-value | AIC     |
|----------------------------------------------------------------------------------------|------------------|------------|-----------------------|-----------------------|---------|---------|
| PCT_CHG_30 AGE SEX SOFA PLAT_COUNT SEPSIS HAEMOGLOBIN WHITE_CELL_COUNT ALBUMIN TRT     | PCT_CHG_30       | 0.965      | 0.931                 | 1.000                 | 0.0487  | 8536.73 |
|                                                                                        | AGE              | 1.006      | 1.005                 | 1.007                 | <.0001  |         |
|                                                                                        | Female vs. Male  | 1.032      | 0.996                 | 1.069                 | 0.0810  |         |
|                                                                                        | SOFA             | 0.929      | 0.900                 | 0.958                 | <.0001  |         |
|                                                                                        | PLAT_COUNT       | 1.000      | 1.000                 | 1.000                 | 0.0311  |         |
|                                                                                        | SEPSIS           | 1.054      | 1.018                 | 1.092                 | 0.0036  |         |
|                                                                                        | HAEMOGLOBIN      | 1.001      | 1.000                 | 1.001                 | 0.1513  |         |
|                                                                                        | WHITE_CELL_COUNT | 0.999      | 0.997                 | 1.000                 | 0.0896  |         |
|                                                                                        | ALBUMIN          | 1.002      | 1.000                 | 1.005                 | 0.0584  |         |
|                                                                                        | Trt: High vs. Lo | 0.963      | 0.931                 | 0.996                 | 0.0302  |         |
| PCT_CHG_30 AGE SEX SOFA PLAT_COUNT SEPSIS WHITE_CELL_COUNT ALBUMIN TRT                 | PCT_CHG_30       | 0.970      | 0.936                 | 1.004                 | 0.0859  | 8536.79 |
|                                                                                        | AGE              | 1.006      | 1.005                 | 1.007                 | <.0001  |         |
|                                                                                        | Female vs. Male  | 1.031      | 0.995                 | 1.068                 | 0.0894  |         |
|                                                                                        | SOFA             | 0.928      | 0.900                 | 0.957                 | <.0001  |         |
|                                                                                        | PLAT_COUNT       | 1.000      | 1.000                 | 1.000                 | 0.0326  |         |
|                                                                                        | SEPSIS           | 1.056      | 1.020                 | 1.094                 | 0.0024  |         |
|                                                                                        | WHITE_CELL_COUNT | 0.999      | 0.997                 | 1.000                 | 0.0993  |         |
|                                                                                        | ALBUMIN          | 1.003      | 1.000                 | 1.005                 | 0.0279  |         |
|                                                                                        | Trt: High vs. Lo | 0.963      | 0.931                 | 0.996                 | 0.0294  |         |
| PCT_CHG_30 AGE SEX SOFA PLAT_COUNT SEPSIS ALBUMIN TRT                                  | PCT_CHG_30       | 0.967      | 0.934                 | 1.001                 | 0.0582  | 8537.56 |
|                                                                                        | AGE              | 1.006      | 1.005                 | 1.007                 | <.0001  |         |
|                                                                                        | Female vs. Male  | 1.031      | 0.995                 | 1.068                 | 0.0909  |         |
|                                                                                        | SOFA             | 0.927      | 0.899                 | 0.956                 | <.0001  |         |
|                                                                                        | PLAT_COUNT       | 1.000      | 1.000                 | 1.000                 | 0.0610  |         |
|                                                                                        | SEPSIS           | 1.053      | 1.017                 | 1.091                 | 0.0040  |         |
|                                                                                        | ALBUMIN          | 1.003      | 1.000                 | 1.005                 | 0.0303  |         |
|                                                                                        | Trt: High vs. Lo | 0.963      | 0.931                 | 0.996                 | 0.0302  |         |
| PCT_CHG_30 AGE SEX SOFA PLAT_COUNT SEPSIS INR HAEMOGLOBIN WHITE_CELL_COUNT ALBUMIN TRT | PCT_CHG_30       | 0.967      | 0.933                 | 1.003                 | 0.0687  | 8537.60 |
|                                                                                        | AGE              | 1.006      | 1.005                 | 1.007                 | <.0001  |         |
|                                                                                        | Female vs. Male  | 1.034      | 0.998                 | 1.071                 | 0.0673  |         |
|                                                                                        | SOFA             | 0.929      | 0.901                 | 0.959                 | <.0001  |         |
|                                                                                        | PLAT_COUNT       | 1.000      | 1.000                 | 1.000                 | 0.0301  |         |
|                                                                                        | SEPSIS           | 1.054      | 1.018                 | 1.092                 | 0.0034  |         |
|                                                                                        | INR              | 0.991      | 0.973                 | 1.008                 | 0.2914  |         |

| Model Variables                                                                              | Predictor        | Odds Ratio | OR 95% CI Lower Bound | OR 95% CI Upper Bound | p-value | AIC     |
|----------------------------------------------------------------------------------------------|------------------|------------|-----------------------|-----------------------|---------|---------|
| PCT_CHG_30 AGE SEX SOFA PLAT_COUNT<br>SEPSIS INR HAEMOGLOBIN<br>WHITE_CELL_COUNT ALBUMIN TRT | HAEMOGLOBIN      | 1.001      | 1.000                 | 1.002                 | 0.1381  | 8537.60 |
|                                                                                              | WHITE_CELL_COUNT | 0.999      | 0.997                 | 1.000                 | 0.0849  |         |
|                                                                                              | ALBUMIN          | 1.002      | 1.000                 | 1.005                 | 0.0514  |         |
|                                                                                              | Trt: High vs. Lo | 0.963      | 0.931                 | 0.996                 | 0.0278  |         |
| PCT_CHG_30 AGE SEX SOFA PLAT_COUNT<br>SEPSIS HAEMOGLOBIN ALBUMIN TRT                         | PCT_CHG_30       | 0.962      | 0.928                 | 0.997                 | 0.0327  | 8537.67 |
|                                                                                              | AGE              | 1.006      | 1.005                 | 1.007                 | <.0001  |         |
|                                                                                              | Female vs. Male  | 1.032      | 0.996                 | 1.069                 | 0.0827  |         |
|                                                                                              | SOFA             | 0.927      | 0.899                 | 0.956                 | <.0001  |         |
|                                                                                              | PLAT_COUNT       | 1.000      | 1.000                 | 1.000                 | 0.0597  |         |
|                                                                                              | SEPSIS           | 1.051      | 1.015                 | 1.089                 | 0.0059  |         |
|                                                                                              | HAEMOGLOBIN      | 1.001      | 1.000                 | 1.001                 | 0.1692  |         |
|                                                                                              | ALBUMIN          | 1.002      | 1.000                 | 1.005                 | 0.0613  |         |
|                                                                                              | Trt: High vs. Lo | 0.964      | 0.932                 | 0.997                 | 0.0310  |         |
| PCT_CHG_30 AGE SOFA PLAT_COUNT<br>SEPSIS WHITE_CELL_COUNT ALBUMIN TRT                        | PCT_CHG_30       | 0.972      | 0.939                 | 1.007                 | 0.1113  | 8537.67 |
|                                                                                              | AGE              | 1.006      | 1.005                 | 1.007                 | <.0001  |         |
|                                                                                              | SOFA             | 0.928      | 0.900                 | 0.957                 | <.0001  |         |
|                                                                                              | PLAT_COUNT       | 1.000      | 1.000                 | 1.000                 | 0.0288  |         |
|                                                                                              | SEPSIS           | 1.058      | 1.021                 | 1.096                 | 0.0018  |         |
|                                                                                              | WHITE_CELL_COUNT | 0.999      | 0.997                 | 1.000                 | 0.1009  |         |
|                                                                                              | ALBUMIN          | 1.003      | 1.000                 | 1.005                 | 0.0339  |         |
|                                                                                              | Trt: High vs. Lo | 0.963      | 0.931                 | 0.996                 | 0.0303  |         |
| PCT_CHG_30 AGE SOFA PLAT_COUNT<br>SEPSIS HAEMOGLOBIN<br>WHITE_CELL_COUNT ALBUMIN TRT         | PCT_CHG_30       | 0.967      | 0.933                 | 1.002                 | 0.0665  | 8537.77 |
|                                                                                              | AGE              | 1.006      | 1.005                 | 1.007                 | <.0001  |         |
|                                                                                              | SOFA             | 0.928      | 0.900                 | 0.957                 | <.0001  |         |
|                                                                                              | PLAT_COUNT       | 1.000      | 1.000                 | 1.000                 | 0.0275  |         |
|                                                                                              | SEPSIS           | 1.056      | 1.019                 | 1.094                 | 0.0026  |         |
|                                                                                              | HAEMOGLOBIN      | 1.001      | 1.000                 | 1.001                 | 0.1682  |         |
|                                                                                              | WHITE_CELL_COUNT | 0.999      | 0.997                 | 1.000                 | 0.0916  |         |
|                                                                                              | ALBUMIN          | 1.002      | 1.000                 | 1.005                 | 0.0682  |         |
|                                                                                              | Trt: High vs. Lo | 0.964      | 0.932                 | 0.997                 | 0.0311  |         |



| Model Variables                                                            | Predictor        | Odds Ratio | OR 95% CI Lower Bound | OR 95% CI Upper Bound | p-value | AIC     |
|----------------------------------------------------------------------------|------------------|------------|-----------------------|-----------------------|---------|---------|
| PCT_CHG_30 AGE SEX SOFA PLAT_COUNT SEPSIS INR WHITE_CELL_COUNT ALBUMIN TRT | PCT_CHG_30       | 0.972      | 0.938                 | 1.007                 | 0.1181  | 8537.80 |
|                                                                            | AGE              | 1.006      | 1.005                 | 1.007                 | <.0001  |         |
|                                                                            | Female vs. Male  | 1.033      | 0.997                 | 1.070                 | 0.0757  |         |
|                                                                            | SOFA             | 0.929      | 0.901                 | 0.958                 | <.0001  |         |
|                                                                            | PLAT_COUNT       | 1.000      | 1.000                 | 1.000                 | 0.0317  |         |
|                                                                            | SEPSIS           | 1.057      | 1.020                 | 1.095                 | 0.0023  |         |
|                                                                            | INR              | 0.991      | 0.974                 | 1.009                 | 0.3233  |         |
|                                                                            | WHITE_CELL_COUNT | 0.999      | 0.997                 | 1.000                 | 0.0947  |         |
|                                                                            | ALBUMIN          | 1.003      | 1.000                 | 1.005                 | 0.0240  |         |
|                                                                            | Trt: High vs. Lo | 0.963      | 0.931                 | 0.996                 | 0.0272  |         |
| PCT_CHG_30 AGE SEX SOFA PLAT_COUNT SEPSIS HAEMOGLOBIN WHITE_CELL_COUNT TRT | PCT_CHG_30       | 0.965      | 0.931                 | 1.001                 | 0.0538  | 8538.31 |
|                                                                            | AGE              | 1.006      | 1.005                 | 1.007                 | <.0001  |         |
|                                                                            | Female vs. Male  | 1.031      | 0.995                 | 1.068                 | 0.0949  |         |
|                                                                            | SOFA             | 0.927      | 0.899                 | 0.956                 | <.0001  |         |
|                                                                            | PLAT_COUNT       | 1.000      | 1.000                 | 1.000                 | 0.0347  |         |
|                                                                            | SEPSIS           | 1.046      | 1.011                 | 1.083                 | 0.0107  |         |
|                                                                            | HAEMOGLOBIN      | 1.001      | 1.000                 | 1.002                 | 0.0687  |         |
|                                                                            | WHITE_CELL_COUNT | 0.999      | 0.997                 | 1.000                 | 0.0942  |         |
|                                                                            | Trt: High vs. Lo | 0.963      | 0.931                 | 0.996                 | 0.0293  |         |
| PCT_CHG_30 AGE SOFA PLAT_COUNT SEPSIS ALBUMIN TRT                          | PCT_CHG_30       | 0.969      | 0.936                 | 1.003                 | 0.0769  | 8538.42 |
|                                                                            | AGE              | 1.006      | 1.005                 | 1.007                 | <.0001  |         |
|                                                                            | SOFA             | 0.927      | 0.898                 | 0.956                 | <.0001  |         |
|                                                                            | PLAT_COUNT       | 1.000      | 1.000                 | 1.000                 | 0.0544  |         |
|                                                                            | SEPSIS           | 1.055      | 1.018                 | 1.092                 | 0.0030  |         |
|                                                                            | ALBUMIN          | 1.003      | 1.000                 | 1.005                 | 0.0367  |         |
|                                                                            | Trt: High vs. Lo | 0.964      | 0.932                 | 0.997                 | 0.0312  |         |
| PCT_CHG_30 AGE SEX SOFA PLAT_COUNT SEPSIS INR HAEMOGLOBIN ALBUMIN TRT      | PCT_CHG_30       | 0.964      | 0.930                 | 0.999                 | 0.0464  | 8538.63 |
|                                                                            | AGE              | 1.006      | 1.005                 | 1.007                 | <.0001  |         |
|                                                                            | Female vs. Male  | 1.034      | 0.997                 | 1.071                 | 0.0694  |         |
|                                                                            | SOFA             | 0.928      | 0.900                 | 0.957                 | <.0001  |         |
|                                                                            | PLAT_COUNT       | 1.000      | 1.000                 | 1.000                 | 0.0587  |         |
|                                                                            | SEPSIS           | 1.051      | 1.015                 | 1.089                 | 0.0057  |         |
|                                                                            | INR              | 0.991      | 0.974                 | 1.009                 | 0.3116  |         |
|                                                                            | HAEMOGLOBIN      | 1.001      | 1.000                 | 1.001                 | 0.1557  |         |

| Model Variables                                                          | Predictor        | Odds Ratio | OR 95% CI<br>Lower Bound | OR 95% CI<br>Upper Bound | p-value | AIC     |
|--------------------------------------------------------------------------|------------------|------------|--------------------------|--------------------------|---------|---------|
| PCT_CHG_30 AGE SEX SOFA PLAT_COUNT<br>SEPSIS INR HAEMOGLOBIN ALBUMIN TRT | ALBUMIN          | 1.002      | 1.000                    | 1.005                    | 0.0544  | 8538.63 |
|                                                                          | Trt: High vs. Lo | 0.963      | 0.931                    | 0.996                    | 0.0287  |         |
| PCT_CHG_30 AGE SEX SOFA PLAT_COUNT<br>SEPSIS INR ALBUMIN TRT             | PCT_CHG_30       | 0.969      | 0.936                    | 1.004                    | 0.0809  | 8538.65 |
|                                                                          | AGE              | 1.006      | 1.005                    | 1.007                    | <.0001  |         |
|                                                                          | Female vs. Male  | 1.033      | 0.997                    | 1.070                    | 0.0776  |         |
|                                                                          | SOFA             | 0.928      | 0.900                    | 0.957                    | <.0001  |         |
|                                                                          | PLAT_COUNT       | 1.000      | 1.000                    | 1.000                    | 0.0600  |         |
|                                                                          | SEPSIS           | 1.053      | 1.017                    | 1.091                    | 0.0039  |         |
|                                                                          | INR              | 0.992      | 0.974                    | 1.009                    | 0.3428  |         |
|                                                                          | ALBUMIN          | 1.003      | 1.000                    | 1.005                    | 0.0263  |         |
|                                                                          | Trt: High vs. Lo | 0.963      | 0.931                    | 0.996                    | 0.0280  |         |
|                                                                          |                  |            |                          |                          |         |         |
| PCT_CHG_30 AGE SOFA PLAT_COUNT<br>SEPSIS HAEMOGLOBIN ALBUMIN TRT         | PCT_CHG_30       | 0.964      | 0.931                    | 0.999                    | 0.0455  | 8538.68 |
|                                                                          | AGE              | 1.006      | 1.005                    | 1.007                    | <.0001  |         |
|                                                                          | SOFA             | 0.927      | 0.899                    | 0.956                    | <.0001  |         |
|                                                                          | PLAT_COUNT       | 1.000      | 1.000                    | 1.000                    | 0.0532  |         |
|                                                                          | SEPSIS           | 1.053      | 1.016                    | 1.090                    | 0.0043  |         |
|                                                                          | HAEMOGLOBIN      | 1.001      | 1.000                    | 1.001                    | 0.1874  |         |
|                                                                          | ALBUMIN          | 1.002      | 1.000                    | 1.005                    | 0.0715  |         |
|                                                                          | Trt: High vs. Lo | 0.964      | 0.932                    | 0.997                    | 0.0320  |         |

| Model Variables                                                                          | Predictor        | Odds Ratio | OR 95% CI<br>Lower Bound | OR 95% CI<br>Upper Bound | p-value | AIC     |
|------------------------------------------------------------------------------------------|------------------|------------|--------------------------|--------------------------|---------|---------|
| PCT_CHG_40 AGE SEX SOFA PLAT_COUNT<br>SEPSIS HAEMOGLOBIN<br>WHITE_CELL_COUNT ALBUMIN TRT | PCT_CHG_40       | 0.933      | 0.899                    | 0.969                    | 0.0003  | 8527.61 |
|                                                                                          | AGE              | 1.006      | 1.005                    | 1.007                    | <.0001  |         |
|                                                                                          | Female vs. Male  | 1.036      | 1.000                    | 1.073                    | 0.0516  |         |
|                                                                                          | SOFA             | 0.933      | 0.905                    | 0.962                    | <.0001  |         |
|                                                                                          | PLAT_COUNT       | 1.000      | 1.000                    | 1.000                    | 0.0174  |         |
|                                                                                          | SEPSIS           | 1.057      | 1.020                    | 1.095                    | 0.0023  |         |
|                                                                                          | HAEMOGLOBIN      | 1.001      | 1.000                    | 1.002                    | 0.0788  |         |
|                                                                                          | WHITE_CELL_COUNT | 0.999      | 0.997                    | 1.000                    | 0.0989  |         |
|                                                                                          | ALBUMIN          | 1.002      | 1.000                    | 1.005                    | 0.0828  |         |
|                                                                                          | Trt: High vs. Lo | 0.962      | 0.930                    | 0.995                    | 0.0232  |         |
| PCT_CHG_40 AGE SEX SOFA PLAT_COUNT<br>SEPSIS HAEMOGLOBIN ALBUMIN TRT                     | PCT_CHG_40       | 0.931      | 0.897                    | 0.967                    | 0.0002  | 8528.39 |
|                                                                                          | AGE              | 1.006      | 1.005                    | 1.007                    | <.0001  |         |
|                                                                                          | Female vs. Male  | 1.036      | 1.000                    | 1.073                    | 0.0532  |         |
|                                                                                          | SOFA             | 0.932      | 0.903                    | 0.961                    | <.0001  |         |
|                                                                                          | PLAT_COUNT       | 1.000      | 1.000                    | 1.000                    | 0.0348  |         |
|                                                                                          | SEPSIS           | 1.054      | 1.017                    | 1.091                    | 0.0038  |         |
|                                                                                          | HAEMOGLOBIN      | 1.001      | 1.000                    | 1.002                    | 0.0909  |         |
|                                                                                          | ALBUMIN          | 1.002      | 1.000                    | 1.005                    | 0.0879  |         |
|                                                                                          | Trt: High vs. Lo | 0.962      | 0.930                    | 0.995                    | 0.0238  |         |
| PCT_CHG_40 AGE SEX SOFA PLAT_COUNT<br>SEPSIS HAEMOGLOBIN<br>WHITE_CELL_COUNT TRT         | PCT_CHG_40       | 0.932      | 0.898                    | 0.968                    | 0.0003  | 8528.63 |
|                                                                                          | AGE              | 1.006      | 1.005                    | 1.007                    | <.0001  |         |
|                                                                                          | Female vs. Male  | 1.035      | 0.999                    | 1.072                    | 0.0592  |         |
|                                                                                          | SOFA             | 0.932      | 0.904                    | 0.961                    | <.0001  |         |
|                                                                                          | PLAT_COUNT       | 1.000      | 1.000                    | 1.000                    | 0.0187  |         |
|                                                                                          | SEPSIS           | 1.049      | 1.014                    | 1.086                    | 0.0062  |         |
|                                                                                          | HAEMOGLOBIN      | 1.001      | 1.000                    | 1.002                    | 0.0322  |         |
|                                                                                          | WHITE_CELL_COUNT | 0.999      | 0.997                    | 1.000                    | 0.1050  |         |
|                                                                                          | Trt: High vs. Lo | 0.961      | 0.930                    | 0.994                    | 0.0224  |         |
| PCT_CHG_40 AGE SEX SOFA PLAT_COUNT<br>SEPSIS WHITE_CELL_COUNT ALBUMIN TRT                | PCT_CHG_40       | 0.940      | 0.906                    | 0.975                    | 0.0009  | 8528.70 |
|                                                                                          | AGE              | 1.006      | 1.005                    | 1.007                    | <.0001  |         |
|                                                                                          | Female vs. Male  | 1.035      | 0.999                    | 1.072                    | 0.0596  |         |
|                                                                                          | SOFA             | 0.933      | 0.904                    | 0.962                    | <.0001  |         |
|                                                                                          | PLAT_COUNT       | 1.000      | 1.000                    | 1.000                    | 0.0183  |         |
|                                                                                          | SEPSIS           | 1.059      | 1.023                    | 1.097                    | 0.0014  |         |

| Model Variables                                                                              | Predictor        | Odds Ratio | OR 95% CI<br>Lower Bound | OR 95% CI<br>Upper Bound | p-value | AIC     |
|----------------------------------------------------------------------------------------------|------------------|------------|--------------------------|--------------------------|---------|---------|
| PCT_CHG_40 AGE SEX SOFA PLAT_COUNT<br>SEPSIS WHITE_CELL_COUNT ALBUMIN TRT                    | WHITE_CELL_COUNT | 0.999      | 0.997                    | 1.000                    | 0.1138  | 8528.70 |
|                                                                                              | ALBUMIN          | 1.003      | 1.000                    | 1.005                    | 0.0338  |         |
|                                                                                              | Trt: High vs. Lo | 0.962      | 0.930                    | 0.994                    | 0.0228  |         |
| PCT_CHG_40 AGE SEX SOFA PLAT_COUNT<br>SEPSIS INR HAEMOGLOBIN<br>WHITE_CELL_COUNT ALBUMIN TRT | PCT_CHG_40       | 0.935      | 0.900                    | 0.971                    | 0.0005  | 8528.72 |
|                                                                                              | AGE              | 1.006      | 1.005                    | 1.007                    | <.0001  |         |
|                                                                                              | Female vs. Male  | 1.037      | 1.001                    | 1.075                    | 0.0433  |         |
|                                                                                              | SOFA             | 0.934      | 0.905                    | 0.963                    | <.0001  |         |
|                                                                                              | PLAT_COUNT       | 1.000      | 1.000                    | 1.000                    | 0.0167  |         |
|                                                                                              | SEPSIS           | 1.057      | 1.020                    | 1.095                    | 0.0022  |         |
|                                                                                              | INR              | 0.992      | 0.974                    | 1.009                    | 0.3468  |         |
|                                                                                              | HAEMOGLOBIN      | 1.001      | 1.000                    | 1.002                    | 0.0711  |         |
|                                                                                              | WHITE_CELL_COUNT | 0.999      | 0.997                    | 1.000                    | 0.0952  |         |
|                                                                                              | ALBUMIN          | 1.002      | 1.000                    | 1.005                    | 0.0736  |         |
|                                                                                              | Trt: High vs. Lo | 0.961      | 0.929                    | 0.994                    | 0.0216  |         |
| PCT_CHG_40 AGE SEX SOFA PLAT_COUNT<br>SEPSIS ALBUMIN TRT                                     | PCT_CHG_40       | 0.938      | 0.904                    | 0.973                    | 0.0006  | 8529.25 |
|                                                                                              | AGE              | 1.006      | 1.005                    | 1.007                    | <.0001  |         |
|                                                                                              | Female vs. Male  | 1.035      | 0.998                    | 1.072                    | 0.0609  |         |
|                                                                                              | SOFA             | 0.931      | 0.903                    | 0.961                    | <.0001  |         |
|                                                                                              | PLAT_COUNT       | 1.000      | 1.000                    | 1.000                    | 0.0352  |         |
|                                                                                              | SEPSIS           | 1.056      | 1.020                    | 1.094                    | 0.0024  |         |
|                                                                                              | ALBUMIN          | 1.003      | 1.000                    | 1.005                    | 0.0373  |         |
|                                                                                              | Trt: High vs. Lo | 0.962      | 0.930                    | 0.995                    | 0.0233  |         |
| PCT_CHG_40 AGE SEX SOFA PLAT_COUNT<br>SEPSIS HAEMOGLOBIN TRT                                 | PCT_CHG_40       | 0.930      | 0.896                    | 0.966                    | 0.0002  | 8529.31 |
|                                                                                              | AGE              | 1.006      | 1.005                    | 1.007                    | <.0001  |         |
|                                                                                              | Female vs. Male  | 1.035      | 0.998                    | 1.072                    | 0.0608  |         |
|                                                                                              | SOFA             | 0.931      | 0.902                    | 0.960                    | <.0001  |         |
|                                                                                              | PLAT_COUNT       | 1.000      | 1.000                    | 1.000                    | 0.0366  |         |
|                                                                                              | SEPSIS           | 1.046      | 1.011                    | 1.083                    | 0.0098  |         |
|                                                                                              | HAEMOGLOBIN      | 1.001      | 1.000                    | 1.002                    | 0.0384  |         |
|                                                                                              | Trt: High vs. Lo | 0.962      | 0.930                    | 0.995                    | 0.0230  |         |

| Model Variables                                                                      | Predictor        | Odds Ratio | OR 95% CI<br>Lower Bound | OR 95% CI<br>Upper Bound | p-value | AIC     |
|--------------------------------------------------------------------------------------|------------------|------------|--------------------------|--------------------------|---------|---------|
| PCT_CHG_40 AGE SOFA PLAT_COUNT<br>SEPSIS HAEMOGLOBIN<br>WHITE_CELL_COUNT ALBUMIN TRT | PCT_CHG_40       | 0.937      | 0.902                    | 0.973                    | 0.0006  | 8529.40 |
|                                                                                      | AGE              | 1.006      | 1.005                    | 1.007                    | <.0001  |         |
|                                                                                      | SOFA             | 0.932      | 0.904                    | 0.962                    | <.0001  |         |
|                                                                                      | PLAT_COUNT       | 1.000      | 1.000                    | 1.000                    | 0.0152  |         |
|                                                                                      | SEPSIS           | 1.059      | 1.022                    | 1.097                    | 0.0016  |         |
|                                                                                      | HAEMOGLOBIN      | 1.001      | 1.000                    | 1.002                    | 0.0914  |         |
|                                                                                      | WHITE_CELL_COUNT | 0.999      | 0.997                    | 1.000                    | 0.1020  |         |
|                                                                                      | ALBUMIN          | 1.002      | 1.000                    | 1.005                    | 0.0954  |         |
|                                                                                      | Trt: High vs. Lo | 0.962      | 0.930                    | 0.995                    | 0.0243  |         |
| PCT_CHG_40 AGE SEX SOFA PLAT_COUNT<br>SEPSIS INR HAEMOGLOBIN ALBUMIN TRT             | PCT_CHG_40       | 0.933      | 0.899                    | 0.969                    | 0.0003  | 8529.56 |
|                                                                                      | AGE              | 1.006      | 1.005                    | 1.007                    | <.0001  |         |
|                                                                                      | Female vs. Male  | 1.037      | 1.001                    | 1.075                    | 0.0450  |         |
|                                                                                      | SOFA             | 0.932      | 0.904                    | 0.962                    | <.0001  |         |
|                                                                                      | PLAT_COUNT       | 1.000      | 1.000                    | 1.000                    | 0.0337  |         |
|                                                                                      | SEPSIS           | 1.054      | 1.017                    | 1.092                    | 0.0036  |         |
|                                                                                      | INR              | 0.992      | 0.975                    | 1.009                    | 0.3645  |         |
|                                                                                      | HAEMOGLOBIN      | 1.001      | 1.000                    | 1.002                    | 0.0826  |         |
|                                                                                      | ALBUMIN          | 1.002      | 1.000                    | 1.005                    | 0.0786  |         |
|                                                                                      | Trt: High vs. Lo | 0.961      | 0.929                    | 0.994                    | 0.0222  |         |

| Model Variables                                                                              | Predictor        | Odds Ratio | OR 95% CI<br>Lower Bound | OR 95% CI<br>Upper Bound | p-value | AIC     |
|----------------------------------------------------------------------------------------------|------------------|------------|--------------------------|--------------------------|---------|---------|
| PCT_CHG_50 AGE SEX SOFA PLAT_COUNT<br>SEPSIS HAEMOGLOBIN<br>WHITE_CELL_COUNT ALBUMIN TRT     | PCT_CHG_50       | 0.914      | 0.877                    | 0.953                    | <.0001  | 8522.40 |
|                                                                                              | AGE              | 1.006      | 1.005                    | 1.007                    | <.0001  |         |
|                                                                                              | Female vs. Male  | 1.036      | 1.000                    | 1.073                    | 0.0525  |         |
|                                                                                              | SOFA             | 0.933      | 0.904                    | 0.962                    | <.0001  |         |
|                                                                                              | PLAT_COUNT       | 1.000      | 1.000                    | 1.000                    | 0.0188  |         |
|                                                                                              | SEPSIS           | 1.058      | 1.021                    | 1.096                    | 0.0020  |         |
|                                                                                              | HAEMOGLOBIN      | 1.001      | 1.000                    | 1.002                    | 0.0629  |         |
|                                                                                              | WHITE_CELL_COUNT | 0.999      | 0.997                    | 1.000                    | 0.1201  |         |
|                                                                                              | ALBUMIN          | 1.002      | 1.000                    | 1.005                    | 0.0824  |         |
|                                                                                              | Trt: High vs. Lo | 0.964      | 0.932                    | 0.997                    | 0.0347  |         |
| PCT_CHG_50 AGE SEX SOFA PLAT_COUNT<br>SEPSIS HAEMOGLOBIN ALBUMIN TRT                         | PCT_CHG_50       | 0.912      | 0.875                    | 0.950                    | <.0001  | 8522.86 |
|                                                                                              | AGE              | 1.006      | 1.005                    | 1.007                    | <.0001  |         |
|                                                                                              | Female vs. Male  | 1.035      | 0.999                    | 1.073                    | 0.0541  |         |
|                                                                                              | SOFA             | 0.931      | 0.903                    | 0.961                    | <.0001  |         |
|                                                                                              | PLAT_COUNT       | 1.000      | 1.000                    | 1.000                    | 0.0358  |         |
|                                                                                              | SEPSIS           | 1.055      | 1.018                    | 1.092                    | 0.0032  |         |
|                                                                                              | HAEMOGLOBIN      | 1.001      | 1.000                    | 1.002                    | 0.0719  |         |
|                                                                                              | ALBUMIN          | 1.002      | 1.000                    | 1.005                    | 0.0871  |         |
|                                                                                              | Trt: High vs. Lo | 0.965      | 0.933                    | 0.998                    | 0.0359  |         |
| PCT_CHG_50 AGE SEX SOFA PLAT_COUNT<br>SEPSIS HAEMOGLOBIN<br>WHITE_CELL_COUNT TRT             | PCT_CHG_50       | 0.913      | 0.876                    | 0.952                    | <.0001  | 8523.42 |
|                                                                                              | AGE              | 1.006      | 1.005                    | 1.007                    | <.0001  |         |
|                                                                                              | Female vs. Male  | 1.035      | 0.999                    | 1.072                    | 0.0603  |         |
|                                                                                              | SOFA             | 0.932      | 0.904                    | 0.961                    | <.0001  |         |
|                                                                                              | PLAT_COUNT       | 1.000      | 1.000                    | 1.000                    | 0.0203  |         |
|                                                                                              | SEPSIS           | 1.050      | 1.015                    | 1.087                    | 0.0055  |         |
|                                                                                              | HAEMOGLOBIN      | 1.001      | 1.000                    | 1.002                    | 0.0248  |         |
|                                                                                              | WHITE_CELL_COUNT | 0.999      | 0.997                    | 1.000                    | 0.1271  |         |
|                                                                                              | Trt: High vs. Lo | 0.964      | 0.932                    | 0.997                    | 0.0336  |         |
| PCT_CHG_50 AGE SEX SOFA PLAT_COUNT<br>SEPSIS INR HAEMOGLOBIN<br>WHITE_CELL_COUNT ALBUMIN TRT | PCT_CHG_50       | 0.916      | 0.879                    | 0.955                    | <.0001  | 8523.77 |
|                                                                                              | AGE              | 1.006      | 1.005                    | 1.007                    | <.0001  |         |
|                                                                                              | Female vs. Male  | 1.037      | 1.001                    | 1.075                    | 0.0455  |         |
|                                                                                              | SOFA             | 0.933      | 0.905                    | 0.963                    | <.0001  |         |
|                                                                                              | PLAT_COUNT       | 1.000      | 1.000                    | 1.000                    | 0.0180  |         |

| Model Variables                                                                              | Predictor        | Odds Ratio | OR 95% CI<br>Lower Bound | OR 95% CI<br>Upper Bound | p-value | AIC     |
|----------------------------------------------------------------------------------------------|------------------|------------|--------------------------|--------------------------|---------|---------|
| PCT_CHG_50 AGE SEX SOFA PLAT_COUNT<br>SEPSIS INR HAEMOGLOBIN<br>WHITE_CELL_COUNT ALBUMIN TRT | SEPSIS           | 1.058      | 1.021                    | 1.096                    | 0.0019  | 8523.77 |
|                                                                                              | INR              | 0.993      | 0.976                    | 1.011                    | 0.4311  |         |
|                                                                                              | HAEMOGLOBIN      | 1.001      | 1.000                    | 1.002                    | 0.0578  |         |
|                                                                                              | WHITE_CELL_COUNT | 0.999      | 0.997                    | 1.000                    | 0.1159  |         |
|                                                                                              | ALBUMIN          | 1.002      | 1.000                    | 1.005                    | 0.0748  |         |
|                                                                                              | Trt: High vs. Lo | 0.964      | 0.932                    | 0.997                    | 0.0324  |         |
| PCT_CHG_50 AGE SEX SOFA PLAT_COUNT<br>SEPSIS HAEMOGLOBIN TRT                                 | PCT_CHG_50       | 0.911      | 0.874                    | 0.949                    | <.0001  | 8523.79 |
|                                                                                              | AGE              | 1.006      | 1.005                    | 1.007                    | <.0001  |         |
|                                                                                              | Female vs. Male  | 1.034      | 0.998                    | 1.072                    | 0.0620  |         |
|                                                                                              | SOFA             | 0.930      | 0.902                    | 0.960                    | <.0001  |         |
|                                                                                              | PLAT_COUNT       | 1.000      | 1.000                    | 1.000                    | 0.0379  |         |
|                                                                                              | SEPSIS           | 1.047      | 1.012                    | 1.084                    | 0.0085  |         |
|                                                                                              | HAEMOGLOBIN      | 1.001      | 1.000                    | 1.002                    | 0.0293  |         |
|                                                                                              | Trt: High vs. Lo | 0.964      | 0.932                    | 0.997                    | 0.0348  |         |
| PCT_CHG_50 AGE SEX SOFA PLAT_COUNT<br>SEPSIS WHITE_CELL_COUNT ALBUMIN TRT                    | PCT_CHG_50       | 0.921      | 0.884                    | 0.959                    | <.0001  | 8523.86 |
|                                                                                              | AGE              | 1.006      | 1.005                    | 1.007                    | <.0001  |         |
|                                                                                              | Female vs. Male  | 1.035      | 0.999                    | 1.072                    | 0.0600  |         |
|                                                                                              | SOFA             | 0.933      | 0.904                    | 0.962                    | <.0001  |         |
|                                                                                              | PLAT_COUNT       | 1.000      | 1.000                    | 1.000                    | 0.0190  |         |
|                                                                                              | SEPSIS           | 1.060      | 1.023                    | 1.098                    | 0.0012  |         |
|                                                                                              | WHITE_CELL_COUNT | 0.999      | 0.997                    | 1.000                    | 0.1377  |         |
|                                                                                              | ALBUMIN          | 1.003      | 1.000                    | 1.005                    | 0.0322  |         |
|                                                                                              | Trt: High vs. Lo | 0.964      | 0.932                    | 0.997                    | 0.0326  |         |
| PCT_CHG_50 AGE SEX SOFA PLAT_COUNT<br>SEPSIS ALBUMIN TRT                                     | PCT_CHG_50       | 0.919      | 0.882                    | 0.957                    | <.0001  | 8524.10 |
|                                                                                              | AGE              | 1.006      | 1.005                    | 1.007                    | <.0001  |         |
|                                                                                              | Female vs. Male  | 1.034      | 0.998                    | 1.072                    | 0.0615  |         |
|                                                                                              | SOFA             | 0.931      | 0.903                    | 0.960                    | <.0001  |         |
|                                                                                              | PLAT_COUNT       | 1.000      | 1.000                    | 1.000                    | 0.0350  |         |
|                                                                                              | SEPSIS           | 1.057      | 1.021                    | 1.095                    | 0.0019  |         |
|                                                                                              | ALBUMIN          | 1.003      | 1.000                    | 1.005                    | 0.0353  |         |
|                                                                                              | Trt: High vs. Lo | 0.964      | 0.932                    | 0.997                    | 0.0337  |         |

| Model Variables                                                                      | Predictor        | Odds Ratio | OR 95% CI<br>Lower Bound | OR 95% CI<br>Upper Bound | p-value | AIC     |
|--------------------------------------------------------------------------------------|------------------|------------|--------------------------|--------------------------|---------|---------|
| PCT_CHG_50 AGE SOFA PLAT_COUNT<br>SEPSIS HAEMOGLOBIN<br>WHITE_CELL_COUNT ALBUMIN TRT | PCT_CHG_50       | 0.917      | 0.880                    | 0.956                    | <.0001  | 8524.16 |
|                                                                                      | AGE              | 1.006      | 1.005                    | 1.007                    | <.0001  |         |
|                                                                                      | SOFA             | 0.932      | 0.904                    | 0.961                    | <.0001  |         |
|                                                                                      | PLAT_COUNT       | 1.000      | 1.000                    | 1.000                    | 0.0160  |         |
|                                                                                      | SEPSIS           | 1.060      | 1.023                    | 1.098                    | 0.0014  |         |
|                                                                                      | HAEMOGLOBIN      | 1.001      | 1.000                    | 1.002                    | 0.0720  |         |
|                                                                                      | WHITE_CELL_COUNT | 0.999      | 0.997                    | 1.000                    | 0.1240  |         |
|                                                                                      | ALBUMIN          | 1.002      | 1.000                    | 1.005                    | 0.0951  |         |
|                                                                                      | Trt: High vs. Lo | 0.964      | 0.933                    | 0.997                    | 0.0354  |         |
| PCT_CHG_50 AGE SEX SOFA PLAT_COUNT<br>SEPSIS INR HAEMOGLOBIN ALBUMIN TRT             | PCT_CHG_50       | 0.914      | 0.876                    | 0.952                    | <.0001  | 8524.29 |
|                                                                                      | AGE              | 1.006      | 1.005                    | 1.007                    | <.0001  |         |
|                                                                                      | Female vs. Male  | 1.037      | 1.000                    | 1.074                    | 0.0473  |         |
|                                                                                      | SOFA             | 0.932      | 0.904                    | 0.961                    | <.0001  |         |
|                                                                                      | PLAT_COUNT       | 1.000      | 1.000                    | 1.000                    | 0.0348  |         |
|                                                                                      | SEPSIS           | 1.055      | 1.018                    | 1.092                    | 0.0031  |         |
|                                                                                      | INR              | 0.993      | 0.976                    | 1.011                    | 0.4528  |         |
|                                                                                      | HAEMOGLOBIN      | 1.001      | 1.000                    | 1.002                    | 0.0665  |         |
|                                                                                      | ALBUMIN          | 1.002      | 1.000                    | 1.005                    | 0.0796  |         |
|                                                                                      | Trt: High vs. Lo | 0.964      | 0.932                    | 0.997                    | 0.0337  |         |



| Model Variables                                                                    | Predictor        | Odds Ratio | OR 95% CI Lower Bound | OR 95% CI Upper Bound | p-value | AIC     |
|------------------------------------------------------------------------------------|------------------|------------|-----------------------|-----------------------|---------|---------|
| PCT_CHG_60 AGE SEX SOFA PLAT_COUNT SEPSIS HAEMOGLOBIN WHITE_CELL_COUNT ALBUMIN TRT | PCT_CHG_60       | 0.940      | 0.896                 | 0.986                 | 0.0120  | 8534.24 |
|                                                                                    | AGE              | 1.006      | 1.005                 | 1.007                 | <.0001  |         |
|                                                                                    | Female vs. Male  | 1.034      | 0.998                 | 1.071                 | 0.0678  |         |
|                                                                                    | SOFA             | 0.927      | 0.899                 | 0.955                 | <.0001  |         |
|                                                                                    | PLAT_COUNT       | 1.000      | 1.000                 | 1.000                 | 0.0509  |         |
|                                                                                    | SEPSIS           | 1.056      | 1.019                 | 1.094                 | 0.0027  |         |
|                                                                                    | HAEMOGLOBIN      | 1.001      | 1.000                 | 1.001                 | 0.1553  |         |
|                                                                                    | WHITE_CELL_COUNT | 0.999      | 0.997                 | 1.000                 | 0.0834  |         |
|                                                                                    | ALBUMIN          | 1.002      | 1.000                 | 1.005                 | 0.0949  |         |
|                                                                                    | Trt: High vs. Lo | 0.964      | 0.932                 | 0.997                 | 0.0344  |         |
| PCT_CHG_60 AGE SEX SOFA PLAT_COUNT SEPSIS WHITE_CELL_COUNT ALBUMIN TRT             | PCT_CHG_60       | 0.945      | 0.901                 | 0.991                 | 0.0198  | 8534.26 |
|                                                                                    | AGE              | 1.006      | 1.005                 | 1.007                 | <.0001  |         |
|                                                                                    | Female vs. Male  | 1.033      | 0.997                 | 1.070                 | 0.0745  |         |
|                                                                                    | SOFA             | 0.927      | 0.899                 | 0.956                 | <.0001  |         |
|                                                                                    | PLAT_COUNT       | 1.000      | 1.000                 | 1.000                 | 0.0484  |         |
|                                                                                    | SEPSIS           | 1.058      | 1.021                 | 1.096                 | 0.0018  |         |
|                                                                                    | WHITE_CELL_COUNT | 0.999      | 0.997                 | 1.000                 | 0.0949  |         |
|                                                                                    | ALBUMIN          | 1.002      | 1.000                 | 1.005                 | 0.0455  |         |
|                                                                                    | Trt: High vs. Lo | 0.964      | 0.932                 | 0.997                 | 0.0328  |         |
| PCT_CHG_60 AGE SEX SOFA PLAT_COUNT SEPSIS HAEMOGLOBIN WHITE_CELL_COUNT TRT         | PCT_CHG_60       | 0.937      | 0.893                 | 0.983                 | 0.0085  | 8535.04 |
|                                                                                    | AGE              | 1.006      | 1.005                 | 1.007                 | <.0001  |         |
|                                                                                    | Female vs. Male  | 1.033      | 0.997                 | 1.070                 | 0.0758  |         |
|                                                                                    | SOFA             | 0.926      | 0.898                 | 0.954                 | <.0001  |         |
|                                                                                    | PLAT_COUNT       | 1.000      | 1.000                 | 1.000                 | 0.0543  |         |
|                                                                                    | SEPSIS           | 1.049      | 1.013                 | 1.086                 | 0.0070  |         |
|                                                                                    | HAEMOGLOBIN      | 1.001      | 1.000                 | 1.002                 | 0.0721  |         |
|                                                                                    | WHITE_CELL_COUNT | 0.999      | 0.997                 | 1.000                 | 0.0892  |         |
|                                                                                    | Trt: High vs. Lo | 0.964      | 0.932                 | 0.997                 | 0.0333  |         |
| PCT_CHG_60 AGE SEX SOFA PLAT_COUNT SEPSIS ALBUMIN TRT                              | PCT_CHG_60       | 0.942      | 0.898                 | 0.988                 | 0.0144  | 8535.11 |
|                                                                                    | AGE              | 1.006      | 1.005                 | 1.007                 | <.0001  |         |
|                                                                                    | Female vs. Male  | 1.033      | 0.997                 | 1.070                 | 0.0764  |         |
|                                                                                    | SOFA             | 0.925      | 0.897                 | 0.954                 | <.0001  |         |
|                                                                                    | PLAT_COUNT       | 1.000      | 1.000                 | 1.000                 | 0.0927  |         |
|                                                                                    | SEPSIS           | 1.055      | 1.018                 | 1.092                 | 0.0032  |         |

| Model Variables                                                                        | Predictor        | Odds Ratio | OR 95% CI Lower Bound | OR 95% CI Upper Bound | p-value | AIC     |
|----------------------------------------------------------------------------------------|------------------|------------|-----------------------|-----------------------|---------|---------|
| PCT_CHG_60 AGE SEX SOFA PLAT_COUNT SEPSIS ALBUMIN TRT                                  | ALBUMIN          | 1.002      | 1.000                 | 1.005                 | 0.0509  | 8535.11 |
|                                                                                        | Trt: High vs. Lo | 0.964      | 0.932                 | 0.997                 | 0.0342  |         |
| PCT_CHG_60 AGE SEX SOFA PLAT_COUNT SEPSIS INR HAEMOGLOBIN WHITE_CELL_COUNT ALBUMIN TRT | PCT_CHG_60       | 0.942      | 0.898                 | 0.989                 | 0.0167  | 8535.14 |
|                                                                                        | AGE              | 1.006      | 1.005                 | 1.007                 | <.0001  |         |
|                                                                                        | Female vs. Male  | 1.035      | 0.999                 | 1.073                 | 0.0561  |         |
|                                                                                        | SOFA             | 0.928      | 0.900                 | 0.956                 | <.0001  |         |
|                                                                                        | PLAT_COUNT       | 1.000      | 1.000                 | 1.000                 | 0.0474  |         |
|                                                                                        | SEPSIS           | 1.056      | 1.019                 | 1.094                 | 0.0026  |         |
|                                                                                        | INR              | 0.991      | 0.973                 | 1.008                 | 0.2955  |         |
|                                                                                        | HAEMOGLOBIN      | 1.001      | 1.000                 | 1.002                 | 0.1388  |         |
|                                                                                        | WHITE_CELL_COUNT | 0.999      | 0.997                 | 1.000                 | 0.0799  |         |
|                                                                                        | ALBUMIN          | 1.002      | 1.000                 | 1.005                 | 0.0828  |         |
|                                                                                        | Trt: High vs. Lo | 0.964      | 0.932                 | 0.997                 | 0.0315  |         |
| PCT_CHG_60 AGE SEX SOFA PLAT_COUNT SEPSIS HAEMOGLOBIN ALBUMIN TRT                      | PCT_CHG_60       | 0.938      | 0.894                 | 0.984                 | 0.0088  | 8535.30 |
|                                                                                        | AGE              | 1.006      | 1.005                 | 1.007                 | <.0001  |         |
|                                                                                        | Female vs. Male  | 1.033      | 0.997                 | 1.071                 | 0.0700  |         |
|                                                                                        | SOFA             | 0.925      | 0.897                 | 0.954                 | <.0001  |         |
|                                                                                        | PLAT_COUNT       | 1.000      | 1.000                 | 1.000                 | 0.0993  |         |
|                                                                                        | SEPSIS           | 1.052      | 1.016                 | 1.090                 | 0.0046  |         |
|                                                                                        | HAEMOGLOBIN      | 1.001      | 1.000                 | 1.001                 | 0.1791  |         |
|                                                                                        | ALBUMIN          | 1.002      | 1.000                 | 1.005                 | 0.1016  |         |
|                                                                                        | Trt: High vs. Lo | 0.965      | 0.933                 | 0.998                 | 0.0358  |         |
| PCT_CHG_60 AGE SEX SOFA PLAT_COUNT SEPSIS INR WHITE_CELL_COUNT ALBUMIN TRT             | PCT_CHG_60       | 0.947      | 0.903                 | 0.994                 | 0.0272  | 8535.33 |
|                                                                                        | AGE              | 1.006      | 1.005                 | 1.007                 | <.0001  |         |
|                                                                                        | Female vs. Male  | 1.034      | 0.998                 | 1.072                 | 0.0631  |         |
|                                                                                        | SOFA             | 0.928      | 0.900                 | 0.957                 | <.0001  |         |
|                                                                                        | PLAT_COUNT       | 1.000      | 1.000                 | 1.000                 | 0.0453  |         |
|                                                                                        | SEPSIS           | 1.058      | 1.021                 | 1.096                 | 0.0017  |         |
|                                                                                        | INR              | 0.991      | 0.974                 | 1.009                 | 0.3361  |         |
|                                                                                        | WHITE_CELL_COUNT | 0.999      | 0.997                 | 1.000                 | 0.0918  |         |
|                                                                                        | ALBUMIN          | 1.003      | 1.000                 | 1.005                 | 0.0386  |         |
|                                                                                        | Trt: High vs. Lo | 0.963      | 0.931                 | 0.996                 | 0.0302  |         |

| Model Variables                                                                      | Predictor        | Odds Ratio | OR 95% CI<br>Lower Bound | OR 95% CI<br>Upper Bound | p-value | AIC     |
|--------------------------------------------------------------------------------------|------------------|------------|--------------------------|--------------------------|---------|---------|
| PCT_CHG_60 AGE SOFA PLAT_COUNT<br>SEPSIS WHITE_CELL_COUNT ALBUMIN TRT                | PCT_CHG_60       | 0.949      | 0.905                    | 0.995                    | 0.0297  | 8535.45 |
|                                                                                      | AGE              | 1.006      | 1.005                    | 1.007                    | <.0001  |         |
|                                                                                      | SOFA             | 0.926      | 0.899                    | 0.955                    | <.0001  |         |
|                                                                                      | PLAT_COUNT       | 1.000      | 1.000                    | 1.000                    | 0.0412  |         |
|                                                                                      | SEPSIS           | 1.060      | 1.023                    | 1.098                    | 0.0014  |         |
|                                                                                      | WHITE_CELL_COUNT | 0.999      | 0.997                    | 1.000                    | 0.0974  |         |
|                                                                                      | ALBUMIN          | 1.002      | 1.000                    | 1.005                    | 0.0530  |         |
|                                                                                      | Trt: High vs. Lo | 0.964      | 0.932                    | 0.997                    | 0.0336  |         |
| PCT_CHG_60 AGE SOFA PLAT_COUNT<br>SEPSIS HAEMOGLOBIN<br>WHITE_CELL_COUNT ALBUMIN TRT | PCT_CHG_60       | 0.944      | 0.900                    | 0.990                    | 0.0188  | 8535.58 |
|                                                                                      | AGE              | 1.006      | 1.005                    | 1.007                    | <.0001  |         |
|                                                                                      | SOFA             | 0.926      | 0.898                    | 0.955                    | <.0001  |         |
|                                                                                      | PLAT_COUNT       | 1.000      | 1.000                    | 1.000                    | 0.0431  |         |
|                                                                                      | SEPSIS           | 1.058      | 1.021                    | 1.096                    | 0.0020  |         |
|                                                                                      | HAEMOGLOBIN      | 1.001      | 1.000                    | 1.001                    | 0.1721  |         |
|                                                                                      | WHITE_CELL_COUNT | 0.999      | 0.997                    | 1.000                    | 0.0862  |         |
|                                                                                      | ALBUMIN          | 1.002      | 1.000                    | 1.005                    | 0.1064  |         |
|                                                                                      | Trt: High vs. Lo | 0.964      | 0.932                    | 0.997                    | 0.0352  |         |
| PCT_CHG_60 AGE SEX SOFA SEPSIS<br>ALBUMIN TRT                                        | PCT_CHG_60       | 0.944      | 0.900                    | 0.990                    | 0.0180  | 8535.93 |
|                                                                                      | AGE              | 1.006      | 1.005                    | 1.007                    | <.0001  |         |
|                                                                                      | Female vs. Male  | 1.034      | 0.998                    | 1.071                    | 0.0660  |         |
|                                                                                      | SOFA             | 0.916      | 0.891                    | 0.943                    | <.0001  |         |
|                                                                                      | SEPSIS           | 1.058      | 1.021                    | 1.095                    | 0.0018  |         |
|                                                                                      | ALBUMIN          | 1.002      | 1.000                    | 1.005                    | 0.0527  |         |
|                                                                                      | Trt: High vs. Lo | 0.965      | 0.933                    | 0.998                    | 0.0365  |         |
| PCT_CHG_60 AGE SEX SOFA PLAT_COUNT<br>SEPSIS HAEMOGLOBIN TRT                         | PCT_CHG_60       | 0.935      | 0.891                    | 0.981                    | 0.0062  | 8535.99 |
|                                                                                      | AGE              | 1.006      | 1.005                    | 1.007                    | <.0001  |         |
|                                                                                      | Female vs. Male  | 1.032      | 0.996                    | 1.070                    | 0.0781  |         |
|                                                                                      | SOFA             | 0.924      | 0.896                    | 0.953                    | <.0001  |         |
|                                                                                      | PLAT_COUNT       | 1.000      | 1.000                    | 1.000                    | 0.1040  |         |
|                                                                                      | SEPSIS           | 1.046      | 1.010                    | 1.082                    | 0.0112  |         |
|                                                                                      | HAEMOGLOBIN      | 1.001      | 1.000                    | 1.002                    | 0.0864  |         |
|                                                                                      | Trt: High vs. Lo | 0.964      | 0.932                    | 0.997                    | 0.0347  |         |

| Model Variables                                                                | Predictor        | Odds Ratio | OR 95% CI Lower Bound | OR 95% CI Upper Bound | p-value | AIC     |
|--------------------------------------------------------------------------------|------------------|------------|-----------------------|-----------------------|---------|---------|
| PCT_CHG_60 AGE SEX SOFA SEPSIS HAEMOGLOBIN ALBUMIN TRT                         | PCT_CHG_60       | 0.939      | 0.895                 | 0.986                 | 0.0108  | 8536.01 |
|                                                                                | AGE              | 1.006      | 1.005                 | 1.007                 | <.0001  |         |
|                                                                                | Female vs. Male  | 1.035      | 0.999                 | 1.072                 | 0.0604  |         |
|                                                                                | SOFA             | 0.916      | 0.891                 | 0.942                 | <.0001  |         |
|                                                                                | SEPSIS           | 1.055      | 1.019                 | 1.093                 | 0.0027  |         |
|                                                                                | HAEMOGLOBIN      | 1.001      | 1.000                 | 1.001                 | 0.1664  |         |
|                                                                                | ALBUMIN          | 1.002      | 1.000                 | 1.005                 | 0.1064  |         |
|                                                                                | Trt: High vs. Lo | 0.965      | 0.933                 | 0.998                 | 0.0381  |         |
| PCT_CHG_60 AGE SEX SOFA SEPSIS HAEMOGLOBIN WHITE_CELL_COUNT ALBUMIN TRT        | PCT_CHG_60       | 0.941      | 0.897                 | 0.988                 | 0.0143  | 8536.05 |
|                                                                                | AGE              | 1.006      | 1.005                 | 1.007                 | <.0001  |         |
|                                                                                | Female vs. Male  | 1.035      | 0.999                 | 1.072                 | 0.0573  |         |
|                                                                                | SOFA             | 0.916      | 0.890                 | 0.942                 | <.0001  |         |
|                                                                                | SEPSIS           | 1.058      | 1.022                 | 1.097                 | 0.0017  |         |
|                                                                                | HAEMOGLOBIN      | 1.001      | 1.000                 | 1.001                 | 0.1471  |         |
|                                                                                | WHITE_CELL_COUNT | 0.999      | 0.998                 | 1.000                 | 0.1642  |         |
|                                                                                | ALBUMIN          | 1.002      | 1.000                 | 1.005                 | 0.1015  |         |
|                                                                                | Trt: High vs. Lo | 0.965      | 0.933                 | 0.998                 | 0.0374  |         |
| PCT_CHG_60 AGE SEX SOFA SEPSIS WHITE_CELL_COUNT ALBUMIN TRT                    | PCT_CHG_60       | 0.946      | 0.902                 | 0.993                 | 0.0238  | 8536.15 |
|                                                                                | AGE              | 1.006      | 1.005                 | 1.007                 | <.0001  |         |
|                                                                                | Female vs. Male  | 1.034      | 0.998                 | 1.072                 | 0.0631  |         |
|                                                                                | SOFA             | 0.916      | 0.890                 | 0.942                 | <.0001  |         |
|                                                                                | SEPSIS           | 1.061      | 1.024                 | 1.099                 | 0.0011  |         |
|                                                                                | WHITE_CELL_COUNT | 0.999      | 0.998                 | 1.000                 | 0.1856  |         |
|                                                                                | ALBUMIN          | 1.002      | 1.000                 | 1.005                 | 0.0486  |         |
|                                                                                | Trt: High vs. Lo | 0.965      | 0.933                 | 0.998                 | 0.0358  |         |
| PCT_CHG_60 AGE SEX SOFA PLAT_COUNT SEPSIS INR HAEMOGLOBIN WHITE_CELL_COUNT TRT | PCT_CHG_60       | 0.939      | 0.895                 | 0.986                 | 0.0114  | 8536.15 |
|                                                                                | AGE              | 1.006      | 1.005                 | 1.007                 | <.0001  |         |
|                                                                                | Female vs. Male  | 1.034      | 0.998                 | 1.072                 | 0.0646  |         |
|                                                                                | SOFA             | 0.926      | 0.899                 | 0.955                 | <.0001  |         |
|                                                                                | PLAT_COUNT       | 1.000      | 1.000                 | 1.000                 | 0.0511  |         |
|                                                                                | SEPSIS           | 1.049      | 1.013                 | 1.086                 | 0.0070  |         |
|                                                                                | INR              | 0.992      | 0.974                 | 1.009                 | 0.3488  |         |
|                                                                                | HAEMOGLOBIN      | 1.001      | 1.000                 | 1.002                 | 0.0626  |         |
|                                                                                | WHITE_CELL_COUNT | 0.999      | 0.997                 | 1.000                 | 0.0860  |         |

| Model Variables                                                                      | Predictor        | Odds Ratio | OR 95% CI<br>Lower Bound | OR 95% CI<br>Upper Bound | p-value | AIC     |
|--------------------------------------------------------------------------------------|------------------|------------|--------------------------|--------------------------|---------|---------|
| PCT_CHG_60 AGE SEX SOFA PLAT_COUNT<br>SEPSIS INR HAEMOGLOBIN<br>WHITE_CELL_COUNT TRT | Trt: High vs. Lo | 0.963      | 0.932                    | 0.997                    | 0.0307  | 8536.15 |
| PCT_CHG_60 AGE SOFA PLAT_COUNT<br>SEPSIS HAEMOGLOBIN<br>WHITE_CELL_COUNT TRT         | PCT_CHG_60       | 0.941      | 0.897                    | 0.988                    | 0.0135  | 8536.19 |
|                                                                                      | AGE              | 1.006      | 1.005                    | 1.007                    | <.0001  |         |
|                                                                                      | SOFA             | 0.925      | 0.897                    | 0.954                    | <.0001  |         |
|                                                                                      | PLAT_COUNT       | 1.000      | 1.000                    | 1.000                    | 0.0462  |         |
|                                                                                      | SEPSIS           | 1.051      | 1.015                    | 1.088                    | 0.0050  |         |
|                                                                                      | HAEMOGLOBIN      | 1.001      | 1.000                    | 1.002                    | 0.0830  |         |
|                                                                                      | WHITE_CELL_COUNT | 0.999      | 0.997                    | 1.000                    | 0.0918  |         |
|                                                                                      | Trt: High vs. Lo | 0.964      | 0.932                    | 0.997                    | 0.0341  |         |
| PCT_CHG_60 AGE SEX SOFA PLAT_COUNT<br>SEPSIS INR ALBUMIN TRT                         | PCT_CHG_60       | 0.945      | 0.900                    | 0.991                    | 0.0199  | 8536.23 |
|                                                                                      | AGE              | 1.006      | 1.005                    | 1.007                    | <.0001  |         |
|                                                                                      | Female vs. Male  | 1.034      | 0.998                    | 1.072                    | 0.0651  |         |
|                                                                                      | SOFA             | 0.926      | 0.898                    | 0.955                    | <.0001  |         |
|                                                                                      | PLAT_COUNT       | 1.000      | 1.000                    | 1.000                    | 0.0879  |         |
|                                                                                      | SEPSIS           | 1.055      | 1.018                    | 1.093                    | 0.0030  |         |
|                                                                                      | INR              | 0.992      | 0.974                    | 1.009                    | 0.3507  |         |
|                                                                                      | ALBUMIN          | 1.003      | 1.000                    | 1.005                    | 0.0435  |         |
|                                                                                      | Trt: High vs. Lo | 0.964      | 0.932                    | 0.997                    | 0.0315  |         |

| Model Variables                                                                | Predictor        | Odds Ratio | OR 95% CI<br>Lower Bound | OR 95% CI<br>Upper Bound | p-value | AIC     |
|--------------------------------------------------------------------------------|------------------|------------|--------------------------|--------------------------|---------|---------|
| NADIR_GE100 AGE SEX SOFA SEPSIS<br>WHITE_CELL_COUNT ALBUMIN TRT                | NADIR_GE100      | 1.068      | 1.029                    | 1.109                    | 0.0006  | 8529.35 |
|                                                                                | AGE              | 1.006      | 1.005                    | 1.007                    | <.0001  |         |
|                                                                                | Female vs. Male  | 1.033      | 0.997                    | 1.070                    | 0.0734  |         |
|                                                                                | SOFA             | 0.934      | 0.906                    | 0.963                    | <.0001  |         |
|                                                                                | SEPSIS           | 1.059      | 1.022                    | 1.097                    | 0.0014  |         |
|                                                                                | WHITE_CELL_COUNT | 0.999      | 0.997                    | 1.000                    | 0.0884  |         |
|                                                                                | ALBUMIN          | 1.003      | 1.000                    | 1.005                    | 0.0384  |         |
|                                                                                | Trt: High vs. Lo | 0.961      | 0.929                    | 0.994                    | 0.0205  |         |
| NADIR_GE100 AGE SEX SOFA SEPSIS<br>HAEMOGLOBIN WHITE_CELL_COUNT<br>ALBUMIN TRT | NADIR_GE100      | 1.070      | 1.030                    | 1.111                    | 0.0004  | 8529.67 |
|                                                                                | AGE              | 1.006      | 1.005                    | 1.007                    | <.0001  |         |
|                                                                                | Female vs. Male  | 1.033      | 0.997                    | 1.070                    | 0.0699  |         |
|                                                                                | SOFA             | 0.934      | 0.906                    | 0.963                    | <.0001  |         |
|                                                                                | SEPSIS           | 1.057      | 1.020                    | 1.095                    | 0.0022  |         |
|                                                                                | HAEMOGLOBIN      | 1.001      | 1.000                    | 1.001                    | 0.1954  |         |
|                                                                                | WHITE_CELL_COUNT | 0.999      | 0.997                    | 1.000                    | 0.0750  |         |
|                                                                                | ALBUMIN          | 1.002      | 1.000                    | 1.005                    | 0.0755  |         |
|                                                                                | Trt: High vs. Lo | 0.961      | 0.929                    | 0.994                    | 0.0211  |         |
| NADIR_GE100 AGE SEX SOFA SEPSIS<br>ALBUMIN TRT                                 | NADIR_GE100      | 1.066      | 1.027                    | 1.107                    | 0.0008  | 8530.31 |
|                                                                                | AGE              | 1.006      | 1.005                    | 1.007                    | <.0001  |         |
|                                                                                | Female vs. Male  | 1.032      | 0.996                    | 1.069                    | 0.0804  |         |
|                                                                                | SOFA             | 0.933      | 0.905                    | 0.962                    | <.0001  |         |
|                                                                                | SEPSIS           | 1.055      | 1.019                    | 1.092                    | 0.0028  |         |
|                                                                                | ALBUMIN          | 1.003      | 1.000                    | 1.005                    | 0.0424  |         |
|                                                                                | Trt: High vs. Lo | 0.961      | 0.929                    | 0.994                    | 0.0215  |         |
| NADIR_GE100 AGE SEX SOFA SEPSIS INR<br>WHITE_CELL_COUNT ALBUMIN TRT            | NADIR_GE100      | 1.067      | 1.028                    | 1.108                    | 0.0007  | 8530.50 |
|                                                                                | AGE              | 1.006      | 1.005                    | 1.007                    | <.0001  |         |
|                                                                                | Female vs. Male  | 1.034      | 0.998                    | 1.072                    | 0.0618  |         |
|                                                                                | SOFA             | 0.934      | 0.906                    | 0.963                    | <.0001  |         |
|                                                                                | SEPSIS           | 1.059      | 1.023                    | 1.097                    | 0.0013  |         |
|                                                                                | INR              | 0.992      | 0.975                    | 1.009                    | 0.3605  |         |
|                                                                                | WHITE_CELL_COUNT | 0.999      | 0.997                    | 1.000                    | 0.0886  |         |
|                                                                                | ALBUMIN          | 1.003      | 1.000                    | 1.005                    | 0.0331  |         |
|                                                                                | Trt: High vs. Lo | 0.960      | 0.928                    | 0.993                    | 0.0190  |         |

| Model Variables                                                                    | Predictor        | Odds Ratio | OR 95% CI<br>Lower Bound | OR 95% CI<br>Upper Bound | p-value | AIC     |
|------------------------------------------------------------------------------------|------------------|------------|--------------------------|--------------------------|---------|---------|
| NADIR_GE100 AGE SOFA SEPSIS<br>WHITE_CELL_COUNT ALBUMIN TRT                        | NADIR_GE100      | 1.067      | 1.028                    | 1.108                    | 0.0007  | 8530.55 |
|                                                                                    | AGE              | 1.006      | 1.005                    | 1.007                    | <.0001  |         |
|                                                                                    | SOFA             | 0.933      | 0.905                    | 0.962                    | <.0001  |         |
|                                                                                    | SEPSIS           | 1.061      | 1.024                    | 1.099                    | 0.0010  |         |
|                                                                                    | WHITE_CELL_COUNT | 0.999      | 0.997                    | 1.000                    | 0.0967  |         |
|                                                                                    | ALBUMIN          | 1.002      | 1.000                    | 1.005                    | 0.0460  |         |
|                                                                                    | Trt: High vs. Lo | 0.961      | 0.929                    | 0.994                    | 0.0212  |         |
| NADIR_GE100 AGE SEX SOFA SEPSIS INR<br>HAEMOGLOBIN WHITE_CELL_COUNT<br>ALBUMIN TRT | NADIR_GE100      | 1.069      | 1.029                    | 1.110                    | 0.0006  | 8530.65 |
|                                                                                    | AGE              | 1.006      | 1.005                    | 1.007                    | <.0001  |         |
|                                                                                    | Female vs. Male  | 1.035      | 0.999                    | 1.072                    | 0.0574  |         |
|                                                                                    | SOFA             | 0.934      | 0.906                    | 0.963                    | <.0001  |         |
|                                                                                    | SEPSIS           | 1.057      | 1.021                    | 1.095                    | 0.0020  |         |
|                                                                                    | INR              | 0.991      | 0.974                    | 1.009                    | 0.3136  |         |
|                                                                                    | HAEMOGLOBIN      | 1.001      | 1.000                    | 1.001                    | 0.1728  |         |
|                                                                                    | WHITE_CELL_COUNT | 0.999      | 0.997                    | 1.000                    | 0.0745  |         |
|                                                                                    | ALBUMIN          | 1.002      | 1.000                    | 1.005                    | 0.0669  |         |
|                                                                                    | Trt: High vs. Lo | 0.961      | 0.929                    | 0.993                    | 0.0195  |         |
| NADIR_GE100 AGE SEX SOFA SEPSIS<br>HAEMOGLOBIN WHITE_CELL_COUNT TRT                | NADIR_GE100      | 1.070      | 1.031                    | 1.111                    | 0.0004  | 8530.84 |
|                                                                                    | AGE              | 1.006      | 1.005                    | 1.007                    | <.0001  |         |
|                                                                                    | Female vs. Male  | 1.032      | 0.996                    | 1.069                    | 0.0811  |         |
|                                                                                    | SOFA             | 0.933      | 0.905                    | 0.962                    | <.0001  |         |
|                                                                                    | SEPSIS           | 1.049      | 1.014                    | 1.086                    | 0.0063  |         |
|                                                                                    | HAEMOGLOBIN      | 1.001      | 1.000                    | 1.002                    | 0.0938  |         |
|                                                                                    | WHITE_CELL_COUNT | 0.999      | 0.997                    | 1.000                    | 0.0782  |         |
|                                                                                    | Trt: High vs. Lo | 0.961      | 0.929                    | 0.994                    | 0.0203  |         |
| NADIR_GE100 AGE SEX SOFA SEPSIS<br>HAEMOGLOBIN ALBUMIN TRT                         | NADIR_GE100      | 1.068      | 1.028                    | 1.108                    | 0.0007  | 8530.91 |
|                                                                                    | AGE              | 1.006      | 1.005                    | 1.007                    | <.0001  |         |
|                                                                                    | Female vs. Male  | 1.032      | 0.997                    | 1.070                    | 0.0772  |         |
|                                                                                    | SOFA             | 0.933      | 0.905                    | 0.962                    | <.0001  |         |
|                                                                                    | SEPSIS           | 1.052      | 1.016                    | 1.090                    | 0.0043  |         |
|                                                                                    | HAEMOGLOBIN      | 1.001      | 1.000                    | 1.001                    | 0.2366  |         |
|                                                                                    | ALBUMIN          | 1.002      | 1.000                    | 1.005                    | 0.0788  |         |
|                                                                                    | Trt: High vs. Lo | 0.961      | 0.929                    | 0.994                    | 0.0222  |         |

| Model Variables                                                            | Predictor        | Odds Ratio | OR 95% CI<br>Lower Bound | OR 95% CI<br>Upper Bound | p-value | AIC     |
|----------------------------------------------------------------------------|------------------|------------|--------------------------|--------------------------|---------|---------|
| NADIR_GE100 AGE SOFA SEPSIS<br>HAEMOGLOBIN WHITE_CELL_COUNT<br>ALBUMIN TRT | NADIR_GE100      | 1.068      | 1.029                    | 1.109                    | 0.0006  | 8530.96 |
|                                                                            | AGE              | 1.006      | 1.005                    | 1.007                    | <.0001  |         |
|                                                                            | SOFA             | 0.933      | 0.905                    | 0.962                    | <.0001  |         |
|                                                                            | SEPSIS           | 1.059      | 1.022                    | 1.097                    | 0.0015  |         |
|                                                                            | HAEMOGLOBIN      | 1.001      | 1.000                    | 1.001                    | 0.2067  |         |
|                                                                            | WHITE_CELL_COUNT | 0.999      | 0.997                    | 1.000                    | 0.0827  |         |
|                                                                            | ALBUMIN          | 1.002      | 1.000                    | 1.005                    | 0.0877  |         |
|                                                                            | Trt: High vs. Lo | 0.961      | 0.929                    | 0.994                    | 0.0219  |         |
| NADIR_GE100 AGE SEX SOFA PLAT_COUNT<br>SEPSIS WHITE_CELL_COUNT ALBUMIN TRT | NADIR_GE100      | 1.066      | 1.021                    | 1.113                    | 0.0037  | 8531.29 |
|                                                                            | AGE              | 1.006      | 1.005                    | 1.007                    | <.0001  |         |
|                                                                            | Female vs. Male  | 1.033      | 0.997                    | 1.070                    | 0.0768  |         |
|                                                                            | SOFA             | 0.934      | 0.906                    | 0.964                    | <.0001  |         |
|                                                                            | PLAT_COUNT       | 1.000      | 1.000                    | 1.000                    | 0.8154  |         |
|                                                                            | SEPSIS           | 1.059      | 1.022                    | 1.097                    | 0.0016  |         |
|                                                                            | WHITE_CELL_COUNT | 0.999      | 0.997                    | 1.000                    | 0.0862  |         |
|                                                                            | ALBUMIN          | 1.003      | 1.000                    | 1.005                    | 0.0381  |         |
|                                                                            | Trt: High vs. Lo | 0.961      | 0.929                    | 0.994                    | 0.0207  |         |
